# Supplementary material for: Reprogramming mRNA Expression in Response to Defect in RNA Polymerase III Assembly in the Yeast Saccharomyces cerevisiae
Source: MDPI journal article supplement (doi:10.3390/ijms22147298), 2021-07-07
Supplement: s1 [file s1]

| Gene         | Forward               | Reverse              |
|--------------|-----------------------|----------------------|
| <i>ACT1</i>  | CATGTTCCCAGGTATTGCCGA | GTCAAAGAAGCCAAGATAGA |
| <i>ARG1</i>  | CAGATACCACCCACCAAAG   | TGACTGGAAGACCACGTTCA |
| <i>ARG3</i>  | TGTATTTTTGCCCCGTGTGAA | TCACAAATTGCTTGCAAAGG |
| <i>BAT1</i>  | TCTTGACCCATCTGCTTGTG  | TACGGGCCATGTTCTTATCC |
| <i>HXT7</i>  | AGCCTCCCCTCGGTTTTAT   | AACGACAGGTTCGTGCTCTT |
| <i>HXT10</i> | CGGAATCGCCCAGATATTTA  | CTCAAAAACAACGCCTGGAT |
| <i>OAC1</i>  | GCCGCATCTGGTATAATTGG  | CGGTGTAGTGCGTTTGTTCA |
