# Supplementary material for: Reprogramming mRNA Expression in Response to Defect in RNA Polymerase III Assembly in the Yeast Saccharomyces cerevisiae
Source: Int J Mol Sci. 2021 Jul 7;22(14):7298. doi: 10.3390/ijms22147298 (PMC8306304; doi:10.3390/ijms22147298)
Supplement: Supplementary file 1 [file ijms-22-07298-s001.zip]

Archive with 6 entries (6 files):
- Fig S1.tif
- Fig S2.tif
- Fig S3.tif
- Legends to Supplementary Figures and Tables.pdf
- Table S1.pdf
- table S2.xlsx
