# Supplementary material for: Reprogramming mRNA Expression in Response to Defect in RNA Polymerase III Assembly in the Yeast Saccharomyces cerevisiae
Source: Int J Mol Sci. 2021 Jul 7;22(14):7298. doi: 10.3390/ijms22147298 (PMC8306304; doi:10.3390/ijms22147298)
Supplement: Supplementary file 1 [file ijms-22-07298-s001.zip › table S2.xlsx]

## Sheet: tabelas1-1
ORF, systematic name	ORF, standard name	description(SGD)	rpc128-1007_wt_FoldChange	rpc128-1007[PRT1]_rpc128-1007_FoldChange,	rpc128-1007[RBS1]_rpc128-1007_FoldChange,	rpc128-1007[RBS1-R3H]_rpc128-1007_FoldChange,	rpc128-1007[PRT1]_wt_FoldChange,	rpc128-1007[RBS1]_wt_FoldChange,	rpc128-1007[RBS1-R3H]_wt_FoldChange,	rpc128-1007_wt_p-adjustment	rpc128-1007[PRT1]_rpc128-1007_p-adjustment	rpc128-1007[RBS1]_rpc128-1007_p-adjustment	rpc128-1007[RBS1-R3H]_rpc128-1007_padjustment	rpc128-1007[PRT1]_wt_p-adjustment	rpc128-1007[RBS1]_wt_p-adjustment	rpc128-1007[RBS1-R3H]_wt_padjustment,	Gcn4
YAL001C	TFC3	Subunit of RNA polymerase III transcription initiation factor complex; part of the TauB domain of TFIIIC that binds DNA at the BoxB promoter sites of tRNA and similar genes; cooperates with Tfc6p in DNA binding; largest of six subunits of the RNA polymerase III transcription initiation factor complex (TFIIIC)	1.41804	0.68455	0.698294	1.03872	0.970717	0.990207	1.47294	0.000284593	5.14104e-05	0.000116609	0.848205	0.870758	0.960543	3.96071e-05	no
YAL002W	VPS8	Membrane-binding component of the CORVET complex; involved in endosomal vesicle tethering and fusion in the endosome to vacuole protein targeting pathway; interacts with Vps21p; contains RING finger motif	1.32898	0.81364	0.768111	0.870774	1.08131	1.0208	1.15724	0.029158	0.141674	0.0351656	0.449703	0.675496	0.929686	0.327147	no
YAL003W	EFB1	Translation elongation factor 1 beta; stimulates nucleotide exchange to regenerate EF-1 alpha-GTP for the next elongation cycle; part of the EF-1 complex, which facilitates binding of aminoacyl-tRNA to the ribosomal A site; human homolog EEF1B2 can complement yeast efb1 mutants	0.970354	1.06518	1.0444	0.922828	1.03361	1.01343	0.89547	0.755235	0.470726	0.598289	0.399569	0.744737	0.911332	0.1314	no
YAL004W	NA	Dubious open reading frame; unlikely to encode a functional protein, based on available experimental and comparative sequence data; completely overlaps verified gene SSA1/YAL005C	NA	NA	NA	NA	NA	NA	NA	NA	NA	NA	NA	NA	NA	NA	Gcn4
YAL005C	SSA1	ATPase involved in protein folding and NLS-directed nuclear transport; member of HSP70 family; required for ubiquitin-dependent degradation of short-lived proteins; forms chaperone complex with Ydj1p; localized to nucleus, cytoplasm, cell wall; 98% identical to paralog Ssa2p with different functional specificity in propagation of yeast [URE3] prions, vacuolar-mediated degradations of gluconeogene…	0.829968	0.908827	1.28476	0.837473	0.754298	1.06631	0.695076	0.364788	0.702925	0.160416	0.480972	0.152231	0.810471	0.0352665	no
YAL007C	ERP2	Member of the p24 family involved in ER to Golgi transport; similar to Emp24p and Erv25p; role in misfolded protein quality control; forms a heterotrimeric complex with Erp1p, Emp24p, and Erv25p; localized to COPII-coated vesicles; ERP2 has a paralog, ERP4, that arose from the whole genome duplication	0.953731	1.02829	1.00255	0.857045	0.980716	0.956165	0.81739	0.677613	0.836816	0.982319	0.114118	0.898634	0.719294	0.0158961	no
YAL008W	FUN14	Integral mitochondrial outer membrane (MOM) protein; dosage suppressor of an MDM10 null that reduces ERMES-related phenotypes, such as alterations in mitochondrial morphology, protein complex assembly, and lipid profile; dosage suppressor of MDM12, MDM34, and MMM1 null mutant growth defects; novel mechanism of MOM import involving Tom70p, the TOM complex, and the TIM23 complex, requiring mitochon…	0.896337	0.989384	1.39978	0.845305	0.886821	1.25468	0.757678	0.510307	0.963984	0.00617489	0.356232	0.498606	0.127133	0.0413236	no
YAL009W	SPO7	Putative regulatory subunit of Nem1p-Spo7p phosphatase holoenzyme; regulates nuclear growth by controlling phospholipid biosynthesis, required for normal nuclear envelope morphology, premeiotic replication, and sporulation	1.01222	1.04838	1.04158	0.971233	1.06119	1.0543	0.983097	0.932418	0.706303	0.703247	0.866378	0.629311	0.671449	0.899368	no
YAL010C	MDM10	Subunit of both the ERMES and the SAM complex; component of ERMES complex which acts as a molecular tether between the mitochondria and the ER, necessary for efficient phospholipid exchange between organelles and for mitophagy; SAM/TOB complex component that functions in the assembly of outer membrane beta-barrel proteins; involved in mitochondrial inheritance and morphology; ERMES complex is oft…	1.06392	0.962122	0.820908	0.931491	1.02362	0.873384	0.991035	0.601513	0.777571	0.024374	0.631039	0.886225	0.217631	0.95142	no
YAL011W	SWC3	Protein of unknown function; component of the SWR1 complex, which exchanges histone variant H2AZ (Htz1p) for chromatin-bound histone H2A; required for formation of nuclear-associated array of smooth endoplasmic reticulum known as karmellae	1.35259	0.765668	0.720772	0.839523	1.03563	0.974909	1.13553	0.00285295	0.00887118	0.000702671	0.158903	0.844764	0.887314	0.292262	no
YAL012W	CYS3	Cystathionine gamma-lyase; catalyzes one of the two reactions involved in the transsulfuration pathway that yields cysteine from homocysteine with the intermediary formation of cystathionine; protein abundance increases in response to DNA replication stress	0.956585	0.895128	0.908066	0.867519	0.856267	0.868643	0.829856	0.718016	0.28706	0.320843	0.187533	0.121173	0.17075	0.036691	no
YAL013W	DEP1	Component of the Rpd3L histone deacetylase complex; required for diauxic shift-induced histone H2B deposition onto rDNA genes; transcriptional modulator involved in regulation of structural phospholipid biosynthesis genes and metabolically unrelated genes, as well as maintenance of telomeres, mating efficiency, and sporulation	1.06637	0.996543	0.825676	0.937728	1.06268	0.880477	0.999966	0.661073	0.989969	0.0808542	0.743391	0.701492	0.345533	0.999698	no
YAL014C	SYN8	Endosomal SNARE related to mammalian syntaxin 8	1.01434	0.938665	0.859609	0.926801	0.952123	0.871934	0.940089	0.902811	0.514504	0.0383366	0.48526	0.644617	0.107367	0.503622	no
YAL015C	NTG1	DNA N-glycosylase and apurinic/apyrimidinic (AP) lyase; involved in base excision repair; acts in both nucleus and mitochondrion; creates a double-strand break at mtDNA origins that stimulates replication in response to oxidative stress; required for maintaining mitochondrial genome integrity; NTG1 has a paralog, NTG2, that arose from the whole genome duplication	1.48481	0.619133	0.675436	1.12485	0.919294	1.00289	1.67019	2.15704e-05	9.78336e-08	1.60592e-05	0.387658	0.555314	0.988307	9.27068e-09	Gcn4
YAL016C-A	NA	Dubious open reading frame; unlikely to encode a functional protein, based on available experimental and comparative sequence data; partially overlaps ORF TPD3/YAL016W	1.52932	1.18907	1.00014	0.322703	1.81847	1.52953	0.493517	NA	NA	NA	NA	NA	NA	NA	no
YAL016C-B	NA	Dubious open reading frame; unlikely to encode a functional protein, based on available experimental and comparative sequence data	0.362467	0.63342	0.584093	4.68013	0.229594	0.211714	1.69639	NA	NA	NA	NA	NA	NA	NA	no
YAL016W	TPD3	Regulatory subunit A of the heterotrimeric PP2A complex; the heterotrimeric protein phosphatase 2A (PP2A) complex also contains regulatory subunit Cdc55p and either catalytic subunit Pph21p or Pph22p; required for cell morphogenesis and transcription by RNA polymerase III	1.03019	0.838421	0.827379	0.820952	0.863732	0.852357	0.845735	0.756767	0.00797528	0.00294354	0.00409964	0.0472662	0.0298248	0.0130535	no
YAL017W	PSK1	PAS domain-containing serine/threonine protein kinase; coordinately regulates protein synthesis and carbohydrate metabolism and storage in response to a unknown metabolite that reflects nutritional status; PSK1 has a paralog, PSK2, that arose from the whole genome duplication	1.0645	0.806125	0.8479	0.898922	0.858118	0.902587	0.956899	0.744655	0.153873	0.2594	0.634504	0.379897	0.587247	0.825355	no
YAL018C	LDS1	Protein Involved in spore wall assembly; localizes to lipid droplets found on or outside of the prospore membrane; shares similarity with Lds2p and Rrt8p, and a strain mutant for all 3 genes exhibits reduced dityrosine fluorescence relative to the single mutants	0.716377	0.781847	1.88394	0.505302	0.560097	1.34961	0.361987	0.640277	0.77347	0.2594	0.412772	0.415135	0.689245	0.102874	no
YAL019W	FUN30	Snf2p family member with ATP-dependent chromatin remodeling activity; has a role in silencing at the mating type locus, telomeres and centromeres; enriched at centromeres and is required for correct chromatin structure around centromeres, as well as at the boundary element of the silent HMR; recruited to DNA double-strand breaks (DSBs) where it promotes 5' strand resection of DSBs; potential Cdc2…	1.3452	0.829647	0.77443	0.866564	1.11604	1.04176	1.1657	0.0130425	0.161492	0.0290448	0.388474	0.493857	0.829473	0.256456	no
YAL019W-A	NA	Dubious open reading frame; unlikely to encode a functional protein, based on available experimental and comparative sequence data; partially overlaps ORF ATS1/YAL020C	1.53787	0.633412	0.584096	0.625046	1	1	1	NA	NA	NA	NA	NA	NA	NA	no
YAL020C	ATS1	Protein required for modification of wobble nucleosides in tRNA; acts with Elongator complex, Kti11p, and Kti12p; has a potential role in regulatory interactions between microtubules and the cell cycle; forms a stable heterodimer with Kti11p	1.16862	1.00171	0.95559	0.876507	1.17061	1.11672	1.0243	0.156619	0.994902	0.712855	0.319889	0.186114	0.38785	0.879469	no
YAL021C	CCR4	Component of the CCR4-NOT transcriptional complex; CCR4-NOT is involved in regulation of gene expression; component of the major cytoplasmic deadenylase, which is involved in mRNA poly(A) tail shortening	1.13316	0.89801	0.873672	0.870208	1.01759	0.99001	0.986085	0.230624	0.32898	0.156753	0.228933	0.920841	0.954754	0.920437	no
YAL022C	FUN26	High affinity, broad selectivity, nucleoside/nucleobase transporter; vacuolar membrane localized transporter which may regulate the balance of nicotinamide riboside (NmR) levels between the cytosol and vacuole, contributing to salvage of NmR for use in cytosolic NAD+ synthesis; equilibrative nucleoside transporter (ENT) family member	1.16342	0.877941	0.919152	0.870107	1.02141	1.06936	1.0123	0.0872815	0.158307	0.356254	0.162171	0.887959	0.554506	0.924817	no
YAL023C	PMT2	Protein O-mannosyltransferase of the ER membrane; transfers mannose residues from dolichyl phosphate-D-mannose to protein serine/threonine residues; involved in ER quality control; acts in a complex with Pmt1p, can instead interact with Pmt5p; antifungal drug target; PMT2 has a paralog, PMT3, that arose from the whole genome duplication	1.22675	0.921649	0.81499	0.816443	1.13063	0.999785	1.00157	0.00190732	0.31837	0.00132429	0.00317013	0.112001	0.999241	0.9877	no
YAL024C	LTE1	Protein similar to GDP/GTP exchange factors; without detectable GEF activity; required for asymmetric localization of Bfa1p at daughter-directed spindle pole bodies and for mitotic exit at low temperatures	1.28993	0.907186	0.825411	0.77865	1.17021	1.06473	1.00441	0.00553376	0.390598	0.0340637	0.00910352	0.155028	0.646704	0.976071	no
YAL025C	MAK16	Essential nuclear protein; constituent of 66S pre-ribosomal particles; required for maturation of 25S and 5,8S rRNAs; required for maintenance of M1 satellite double-stranded RNA of the L-A virus	1.25875	0.932988	0.965385	0.912985	1.1744	1.21518	1.14922	0.00784316	0.554896	0.752075	0.479857	0.103487	0.0412162	0.143247	no
YAL026C	DRS2	Trans-golgi network aminophospholipid translocase (flippase); maintains membrane lipid asymmetry in post-Golgi secretory vesicles; contributes to clathrin-coated vesicle formation, endocytosis, protein trafficking between the Golgi and endosomal system and the cellular response to mating pheromone; autoinhibited by its C-terminal tail; localizes to the trans-Golgi network; mutations in human homo…	1.70022	0.627174	0.614765	1.57973	1.06634	1.04524	2.68588	1.02374e-06	1.68299e-05	6.36173e-06	4.48077e-05	0.718822	0.815673	1.58655e-22	Gcn4
YAL026C-A	NA	Dubious open reading frame; unlikely to encode a functional protein, based on available experimental and comparative sequence data; partially overlaps the uncharacterized ORF YAL027W and the verified gene DRS2	NA	NA	NA	NA	NA	NA	NA	NA	NA	NA	NA	NA	NA	NA	no
YAL027W	SAW1	5'- and 3'-flap DNA binding protein; recruits Rad1p-Rad10p to single-strand annealing intermediates with 3' non-homologous tails for removal during double-strand break repair; complexes with Rad1p-Rad10p and stimulates its endonuclease activity; green fluorescent protein (GFP)-fusion protein localizes to the nucleus	0.985337	0.857596	0.891013	0.842025	0.845021	0.877948	0.829678	0.937305	0.26301	0.371874	0.254423	0.238119	0.378814	0.148598	no
YAL028W	FRT2	Tail-anchored ER membrane protein of unknown function; interacts with homolog Frt1p; promotes growth in conditions of high Na+, alkaline pH, or cell wall stress, possibly via a role in posttranslational translocation; potential Cdc28p substrate; FRT2 has a paralog, FRT1, that arose from the whole genome duplication	1.14197	0.996289	0.864614	0.759391	1.13773	0.987363	0.867201	0.647874	0.994902	0.572285	0.356232	0.681576	0.976895	0.626097	Gcn4
YAL029C	MYO4	Type V myosin motor involved in actin-based transport of cargos; required for mRNA transport, including ASH1 mRNA, and facilitating the growth and movement of ER tubules into the growing bud along with She3p; MYO4 has a paralog, MYO2, that arose from the whole genome duplication	1.28519	0.76151	0.761856	0.877433	0.978683	0.979128	1.12767	0.00304736	0.000909723	0.000775439	0.234985	0.891842	0.886545	0.219678	no
YAL030W	SNC1	Vesicle membrane receptor protein (v-SNARE); involved in the fusion between Golgi-derived secretory vesicles with the plasma membrane; proposed to be involved in endocytosis; member of the synaptobrevin/VAMP family of R-type v-SNARE proteins; SNC1 has a paralog, SNC2, that arose from the whole genome duplication	0.944802	0.751661	1.1995	1.08598	0.710171	1.13329	1.02604	0.726194	0.0146036	0.122763	0.677446	0.00410639	0.389136	0.886085	no
YAL031C	GIP4	Cytoplasmic protein that regulates protein phosphatase 1 Glc7p; protein overexpression relocalizes Glc7p from the nucleus and prevents chromosome segregation; potential Cdc28p substrate	1.34142	1.01141	0.648744	0.836655	1.35673	0.870236	1.1223	0.000927573	0.941714	2.10712e-07	0.0853534	0.000974007	0.238399	0.291862	no
YAL031W-A	NA	Dubious open reading frame; unlikely to encode a functional protein, based on available experimental and comparative sequence data; partially overlaps ORF GIP4/YAL031C	2.0987	0.949635	0.224107	0.239818	1.993	0.470331	0.503306	NA	NA	NA	NA	NA	NA	NA	no
YAL032C	PRP45	Protein required for pre-mRNA splicing; associates with the spliceosome and interacts with splicing factors Prp22p and Prp46p; orthologous to human transcriptional coactivator SKIP and can activate transcription of a reporter gene	1.38147	0.87619	0.654574	0.789437	1.21043	0.904273	1.09058	0.000886236	0.256011	4.12898e-06	0.0284755	0.10317	0.464364	0.503121	no
YAL033W	POP5	Subunit of both RNase MRP and nuclear RNase P; RNase MRP cleaves pre-rRNA, while nuclear RNase P cleaves tRNA precursors to generate mature 5' ends and facilitates turnover of nuclear RNAs	1.12354	0.954483	0.975943	0.855796	1.0724	1.09651	0.96152	0.286002	0.738228	0.845084	0.169199	0.602653	0.449084	0.772615	no
YAL034C	FUN19	Non-essential protein of unknown function; expression induced in response to heat stress; FUN19 has a paralog, YOR338W, that arose from the whole genome duplication	1.27304	0.898612	0.802558	0.675627	1.14397	1.02169	0.8601	0.0396894	0.455691	0.0496595	0.000481544	0.353863	0.916226	0.256957	no
YAL034C-B	NA	Dubious open reading frame; unlikely to encode a functional protein, based on available experimental and comparative sequence data	0.30722	1.26442	2.11762	0.625043	0.388455	0.650574	0.192026	NA	NA	NA	NA	NA	NA	NA	no
YAL034W-A	MTW1	Essential component of the MIND kinetochore complex; joins kinetochore subunits contacting DNA to those contacting microtubules; critical to kinetochore assembly; complex consists of Mtw1p Including Nnf1p-Nsl1p-Dsn1p (MIND)	1.43176	0.96774	0.81098	0.80483	1.38558	1.16113	1.15233	0.0505978	0.910248	0.259726	0.360729	0.104653	0.5369	0.530417	no
YAL035W	FUN12	Translation initiation factor eIF5B; GTPase that promotes Met-tRNAiMet binding to ribosomes and ribosomal subunit joining; promotes GTP-dependent maturation of 18S rRNA by Nob1p; protein abundance increases in response to DNA replication stress; homolog of bacterial IF2	1.22387	0.744491	0.891747	0.804119	0.911162	1.09139	0.984139	0.0979529	0.00801741	0.365568	0.0931613	0.548822	0.57583	0.927952	no
YAL036C	RBG1	Member of the DRG family of GTP-binding proteins; associates with translating ribosomes; interacts with Tma46p, Ygr250cp, Gir2p and Yap1p via two-hybrid	1.2335	0.807939	0.935906	0.940003	0.996594	1.15444	1.1595	0.0140729	0.0114107	0.508769	0.671444	0.985023	0.147433	0.103781	no
YAL037C-A	NA	Putative protein of unknown function	0.587324	2.38257	1.35922	1.33693	1.39934	0.798303	0.785211	0.554833	0.275631	0.731245	0.839042	NA	0.836404	0.808216	no
YAL037C-B	NA	Dubious open reading frame; unlikely to encode a functional protein, based on available experimental and comparative sequence data; identified by gene-trapping, microarray-based expression analysis, and genome-wide homology searching	NA	NA	NA	NA	NA	NA	NA	NA	NA	NA	NA	NA	NA	NA	no
YAL037W	NA	Putative protein of unknown function; YAL037W has a paralog, YOR342C, that arose from the whole genome duplication	0.897074	1.08392	1.30567	1.08148	0.972352	1.17128	0.970171	0.680606	0.788511	0.182037	0.839953	0.942575	0.53968	0.919119	no
YAL038W	CDC19	Pyruvate kinase; functions as a homotetramer in glycolysis to convert phosphoenolpyruvate to pyruvate, the input for aerobic (TCA cycle) or anaerobic (glucose fermentation) respiration; regulated via allosteric activation by fructose bisphosphate; CDC19 has a paralog, PYK2, that arose from the whole genome duplication	1.01773	0.92678	0.859624	0.873652	0.943214	0.874867	0.889144	0.907005	0.541893	0.116217	0.2654	0.660668	0.23391	0.267445	no
YAL039C	CYC3	Cytochrome c heme lyase (holocytochrome c synthase); attaches heme to apo-cytochrome c (Cyc1p or Cyc7p) in mitochondrial intermembrane space; human homolog HCCS implicated in microphthalmia with linear skin defects (MLS), and can complement yeast null mutant	1.24981	0.630133	0.681256	0.716121	0.78755	0.851444	0.895018	0.00821842	8.533e-10	5.37197e-07	4.24086e-05	0.0065287	0.0980793	0.251564	no
YAL040C	CLN3	G1 cyclin involved in cell cycle progression; activates Cdc28p kinase to promote G1 to S phase transition; plays a role in regulating transcription of other G1 cyclins, CLN1 and CLN2; regulated by phosphorylation and proteolysis; acetyl-CoA induces CLN3 transcription in response to nutrient repletion to promote cell-cycle entry; cell cycle arrest phenotype of the cln1 cln2 cln3 triple null mutant…	0.8715	0.929821	1.0297	0.800175	0.81034	0.897381	0.697353	0.244629	0.610331	0.832921	0.0526084	0.0645213	0.409639	0.00019571	no
YAL041W	CDC24	Guanine nucleotide exchange factor (GEF) for Cdc42p; required for polarity establishment and maintenance, and mutants have morphological defects in bud formation and shmooing; relocalizes from nucleus to cytoplasm upon DNA replication stress; thermosensitivity of the cdc24-4 mutant in the presence of sorbitol is functionally complemented by human CDC42	1.12821	0.995929	0.809452	0.864016	1.12362	0.913231	0.97479	0.280682	0.983893	0.0241368	0.228775	0.333925	0.473466	0.862971	no
YAL042C-A	NA	Dubious open reading frame; unlikely to encode a functional protein, based on available experimental and comparative sequence data; partially overlaps verified ORF ERV46/YAL042W; YAL042C-A is a non-essential gene	NA	NA	NA	NA	NA	NA	NA	NA	NA	NA	NA	NA	NA	NA	no
YAL042W	ERV46	Protein localized to COPII-coated vesicles; forms a complex with Erv41p; involved in the membrane fusion stage of transport	1.14104	0.855303	1.10411	0.904538	0.975934	1.25983	1.03211	0.129809	0.0624596	0.248742	0.36102	0.859316	0.00523914	0.78302	no
YAL043C	PTA1	Subunit of holo-CPF; holo-CPF is a multiprotein complex and functional homolog of mammalian CPSF, required for the cleavage and polyadenylation of mRNA and snoRNA 3' ends; involved in pre-tRNA processing; binds to the phosphorylated CTD of RNAPII	1.11707	1.0166	0.920092	0.879591	1.13561	1.0278	0.982562	0.273885	0.910416	0.393558	0.251554	0.223887	0.846328	0.898243	no
YAL044C	GCV3	H subunit of the mitochondrial glycine decarboxylase complex; glycine decarboxylase is required for the catabolism of glycine to 5,10-methylene-THF; also required for all protein lipoylation; expression is regulated by levels of 5,10-methylene-THF	2.06141	0.550845	0.523256	1.04443	1.13552	1.07864	2.15301	5.6481e-49	3.34417e-34	1.80372e-40	0.645387	0.0491935	0.299035	1.10353e-55	no
YAL044W-A	BOL1	Mitochondrial matrix protein involved in Fe-S cluster biogenesis; facilitates [4Fe-2S] cluster inception into mitochondrial proteins such as lipoate synthase and succinate dehydrogenase; interacts and may function with Grx5p at an early step in Fe-S cluster biosynthesis; forms dimeric complexes with Grx5p and Nfu1p that alter the stability of shared Fe/S clusters; sequence similarity to human BOL…	0.789574	0.633421	0.584096	0.625046	0.500133	0.461187	0.49352	NA	NA	NA	NA	NA	NA	NA	no
YAL045C	NA	Dubious open reading frame; unlikely to encode a functional protein, based on available experimental and comparative sequence data; almost completely overlaps YAL044W-A	NA	NA	NA	NA	NA	NA	NA	NA	NA	NA	NA	NA	NA	NA	no
YAL046C	BOL3	Protein involved in Fe-S cluster transfer to mitochondrial clients; protects [4Fe-4S] clusters from damage due to oxidative stress by acting along with Nfu1p at a late step in the transfer of [4Fe-4S] clusters from the ISA complex to mitochondrial client proteins like lipoate synthase and succinate dehydrogenase; sequence similarity to human BOLA family member, BOLA3, mutations of which are assoc…	1.25567	0.683841	0.757622	0.939983	0.858678	0.951323	1.18031	0.0130425	5.73599e-06	0.00115048	0.694862	0.168803	0.720901	0.0913942	no
YAL047C	SPC72	Gamma-tubulin small complex (gamma-TuSC) receptor; recruits the gamma-TuSC complex to the cytoplasmic side of the SPB, connecting nuclear microtubules to the SPB; involved in astral microtubule formation, stabilization, and with Stu2p, anchoring astral MTs at the cytoplasmic face of the SPB, and regulating plus-end MT dynamics; regulated by Cdc5 kinase	1.26247	0.970717	0.848118	0.961959	1.2255	1.07072	1.21444	0.0546657	0.872002	0.169973	0.866378	0.129293	0.691679	0.123445	no
YAL047W-A	NA	Dubious open reading frame; unlikely to encode a functional protein, based on available experimental and comparative sequence data; partially overlaps ORF GEM1/YAL048C	NA	NA	NA	NA	NA	NA	NA	NA	NA	NA	NA	NA	NA	NA	no
YAL048C	GEM1	Outer mitochondrial membrane GTPase, subunit of the ERMES complex; potential regulatory subunit of the ERMES complex that links the ER to mitochondria and may promote inter-organellar calcium and phospholipid exchange as well as coordinating mitochondrial DNA replication and growth; cells lacking Gem1p contain collapsed, globular, or grape-like mitochondria; ortholog of metazoan Miro GTPases	1.57448	0.659456	0.660331	1.05415	1.0383	1.03968	1.65974	1.55842e-06	8.18446e-06	7.57274e-06	0.775635	0.835158	0.819051	5.0554e-08	Gcn4
YAL049C	AIM2	Cytoplasmic protein involved in mitochondrial function or organization; null mutant displays reduced frequency of mitochondrial genome loss; potential Hsp82p interactor	0.886702	1.04073	1.12384	0.832895	0.922818	0.996509	0.738529	0.289784	0.792704	0.266749	0.108555	0.546626	0.984351	0.00119941	Gcn4
YAL051W	OAF1	Oleate-activated transcription factor; subunit of a heterodimeric complex with Pip2p, which binds to oleate-response elements (ORE) in the promoter of genes involved in beta-oxidation of fatty acids, peroxisome organization and biogenesis, activating transcription in the presence of oleate; regulates chromatin silencing at telomeres; involved in diauxic shift; OAF1 has a paralog, PIP2, that arose…	1.08596	0.882918	0.828484	0.883781	0.958813	0.8997	0.95975	0.418118	0.186583	0.0201212	0.246754	0.737795	0.30739	0.725002	no
YAL053W	FLC2	Putative calcium channel involved in calcium release under hypotonic stress; required for uptake of FAD into endoplasmic reticulum; involved in cell wall maintenance; FLC2 has a paralog, YOR365C, that arose from the whole genome duplication	1.17068	0.744429	0.755757	0.822748	0.871485	0.884746	0.963171	0.248699	0.0121694	0.0148809	0.176936	0.361741	0.421928	0.829523	no
YAL054C	ACS1	Acetyl-coA synthetase isoform; along with Acs2p, acetyl-coA synthetase isoform is the nuclear source of acetyl-coA for histone acetylation; expressed during growth on nonfermentable carbon sources and under aerobic conditions	1.12602	0.780179	1.0225	0.829473	0.878498	1.15136	0.934004	0.324108	0.0149815	0.870737	0.113909	0.324294	0.255392	0.618671	no
YAL055W	PEX22	Putative peroxisomal membrane protein; required for import of peroxisomal proteins; functionally complements a Pichia pastoris pex22 mutation	0.955976	0.93165	0.855697	0.83922	0.890635	0.818026	0.802274	0.808993	0.706359	0.260971	0.305929	0.50618	0.186598	0.114241	no
YAL056C-A	NA	Dubious open reading frame; unlikely to encode a functional protein, based on available experimental and comparative sequence data	0.265713	2.08917	1.98678	1.20875	0.555121	0.527914	0.32118	NA	NA	NA	NA	NA	NA	NA	no
YAL056W	GPB2	Multistep regulator of cAMP-PKA signaling; inhibits PKA downstream of Gpa2p and Cyr1p, thereby increasing cAMP dependency; inhibits Ras activity through direct interactions with Ira1p/2p; regulated by G-alpha protein Gpa2p; GPB2 has a paralog, GPB1, that arose from the whole genome duplication	1.24364	0.91752	0.75978	0.871052	1.14106	0.944893	1.08328	0.0310884	0.502604	0.00311322	0.283018	0.276468	0.699297	0.516997	no
YAL058W	CNE1	Calnexin; integral membrane ER chaperone involved in folding and quality control of glycoproteins; chaperone activity is inhibited by Mpd1p, with which Cne1p interacts; 24% identical to mammalian calnexin; Ca+ binding not yet shown in yeast	1.16766	0.906359	0.793055	0.885533	1.05831	0.926015	1.034	0.148024	0.41694	0.0134105	0.36102	0.695964	0.576745	0.817855	no
YAL059C-A	NA	Dubious open reading frame; unlikely to encode a functional protein, based on available experimental and comparative sequence data; partially overlaps verified gene ECM1/YAL059W	NA	NA	NA	NA	NA	NA	NA	NA	NA	NA	NA	NA	NA	NA	no
YAL059W	ECM1	Pre-ribosomal factor involved in 60S ribosomal protein subunit export; associates with the pre-60S particle; shuttles between the nucleus and cytoplasm	0.970687	1.00333	0.989512	1.059	0.973921	0.960507	1.02795	0.933697	0.99533	0.972863	0.900235	0.951683	0.915067	0.934802	no
YAL060W	BDH1	NAD-dependent (R,R)-butanediol dehydrogenase; catalyzes oxidation of (R,R)-2,3-butanediol to (3R)-acetoin, oxidation of meso-butanediol to (3S)-acetoin, and reduction of acetoin; enhances use of 2,3-butanediol as an aerobic carbon source	1.83297	0.484904	0.34568	1.22592	0.888816	0.633621	2.24709	1.74172e-15	5.94827e-22	1.26781e-45	0.026687	0.281402	5.75747e-08	7.52642e-28	no
YAL061W	BDH2	Putative medium-chain alcohol dehydrogenase with similarity to BDH1; transcription induced by constitutively active PDR1 and PDR3	1.44628	0.574415	0.448676	1.04454	0.830765	0.648912	1.5107	0.00881977	2.16307e-05	3.32332e-10	0.879993	0.301084	0.00437497	0.00252852	Gcn4
YAL062W	GDH3	NADP(+)-dependent glutamate dehydrogenase; synthesizes glutamate from ammonia and alpha-ketoglutarate; rate of alpha-ketoglutarate utilization differs from Gdh1p; expression regulated by nitrogen and carbon sources; GDH3 has a paralog, GDH1, that arose from the whole genome duplication	1.12987	0.889763	0.729482	0.679134	1.00532	0.824223	0.767337	0.485365	0.526183	0.0220468	0.00932376	0.985316	0.278119	0.0925267	no
YAL063C	FLO9	Lectin-like protein with similarity to Flo1p; thought to be expressed and involved in flocculation	1.28222	0.645256	0.85912	1.19759	0.827358	1.10158	1.53557	0.617285	0.341995	0.743277	0.787024	0.751291	0.878954	0.317853	no
YAL063C-A	NA	Putative protein of unknown function; identified by expression profiling and mass spectrometry	0.913996	0.903038	2.4898	0.773642	0.825374	2.27567	0.707106	0.870546	0.864161	0.00356203	0.692699	0.727206	0.0225757	0.44866	no
YAL064C-A	TDA8	Putative protein of unknown function; null mutant is sensitive to expression of the top1-T722A allele; not an essential gene	0.422711	1.86679	1.03904	1.14461	0.789114	0.439212	0.48384	0.325097	0.528873	0.973061	0.938503	NA	0.379525	0.413878	no
YAL064W	NA	Protein of unknown function; may interact with ribosomes, based on co-purification experiments	NA	NA	NA	NA	NA	NA	NA	NA	NA	NA	NA	NA	NA	NA	Gcn4
YAL064W-B	NA	Fungal-specific protein of unknown function	NA	NA	NA	NA	NA	NA	NA	NA	NA	NA	NA	NA	NA	NA	no
YAL065C	NA	Putative protein of unknown function; shows sequence similarity to FLO1 and other flocculins	NA	NA	NA	NA	NA	NA	NA	NA	NA	NA	NA	NA	NA	NA	no
YAL066W	NA	Dubious open reading frame; unlikely to encode a functional protein, based on available experimental and comparative sequence data	NA	NA	NA	NA	NA	NA	NA	NA	NA	NA	NA	NA	NA	NA	no
YAL067C	SEO1	Putative permease; member of the allantoate transporter subfamily of the major facilitator superfamily; mutation confers resistance to ethionine sulfoxide	NA	NA	NA	NA	NA	NA	NA	NA	NA	NA	NA	NA	NA	NA	no
YAL067W-A	NA	Putative protein of unknown function; identified by gene-trapping, microarray-based expression analysis, and genome-wide homology searching	NA	NA	NA	NA	NA	NA	NA	NA	NA	NA	NA	NA	NA	NA	no
YAL068C	PAU8	Protein of unknown function; member of the seripauperin multigene family encoded mainly in subtelomeric regions	NA	NA	NA	NA	NA	NA	NA	NA	NA	NA	NA	NA	NA	NA	no
YAL068W-A	NA	Dubious open reading frame; unlikely to encode a functional protein, based on available experimental and comparative sequence data; identified by gene-trapping, microarray-based expression analysis, and genome-wide homology searching	NA	NA	NA	NA	NA	NA	NA	NA	NA	NA	NA	NA	NA	NA	no
YAL069W	NA	Dubious open reading frame; unlikely to encode a functional protein, based on available experimental and comparative sequence data	NA	NA	NA	NA	NA	NA	NA	NA	NA	NA	NA	NA	NA	NA	no
YAR002C-A	ERP1	Member of the p24 family involved in ER to Golgi transport; role in misfolded protein quality control; forms heterotrimeric complex with Erp2p, Emp24p, and Erv25p; localized to COPII-coated vesicles; ERP1 has a paralog, ERP6, that arose from the whole genome duplication	1.11652	0.905877	1.04342	0.941835	1.01143	1.16499	1.05157	0.160973	0.226897	0.624557	0.600891	0.935408	0.050798	0.582793	no
YAR002W	NUP60	FG-nucleoporin component of central core of the nuclear pore complex; contributes directly to nucleocytoplasmic transport and maintenance of the nuclear pore complex (NPC) permeability barrier and is involved in gene tethering at the nuclear periphery; relocalizes to the cytosol in response to hypoxia; both NUP1 and NUP60 are homologous to human NUP153	1.14265	0.911588	0.899071	0.818998	1.04163	1.02732	0.935829	0.128295	0.341525	0.213281	0.0189431	0.735061	0.835036	0.509952	no
YAR003W	SWD1	Subunit of the COMPASS (Set1C) complex; COMPASS methylates histone H3 on lysine 4 and is required in transcriptional silencing near telomeres; WD40 beta propeller superfamily member with similarity to mammalian Rbbp7	1.3156	0.900491	0.968299	0.969725	1.18469	1.2739	1.27577	0.00249435	0.351958	0.788873	0.869175	0.116419	0.0157555	0.00851077	no
YAR007C	RFA1	Subunit of heterotrimeric Replication Protein A (RPA); RPA is a highly conserved single-stranded DNA binding protein involved in DNA replication, repair, and recombination; RPA protects against inappropriate telomere recombination, and upon telomere uncapping, prevents cell proliferation by a checkpoint-independent pathway; role in DNA catenation/decatenation pathway of chromosome disentangling; …	0.876084	0.96512	0.918812	0.819112	0.845526	0.804956	0.717611	0.259864	0.8294	0.473071	0.0864831	0.154352	0.052387	0.000544845	no
YAR008W	SEN34	Subunit of the tRNA splicing endonuclease; tRNA splicing endonuclease (Sen complex) is composed of Sen2p, Sen15p, Sen34p, and Sen54p; Sen complex also cleaves the CBP1 mRNA at the mitochondrial surface; Sen34p contains the active site for tRNA 3' splice site cleavage and has similarity to Sen2p and to Archaeal tRNA splicing endonuclease	0.916556	0.94704	0.888817	0.784759	0.868015	0.814651	0.719276	0.479304	0.712157	0.276809	0.0246392	0.240298	0.066187	0.000576129	no
YAR014C	BUD14	Protein involved in bud-site selection; Bud14p-Glc7p complex is a cortical regulator of dynein; forms a complex with Kel1p and Kel2p that regulates Bnr1p (formin) to affect actin cable assembly, cytokinesis, and polarized growth; diploid mutants display a random budding pattern instead of the wild-type bipolar pattern; relative distribution to the nucleus increases upon DNA replication stress	1.19501	0.794844	0.827542	0.992796	0.949844	0.988919	1.1864	0.00817181	0.000296267	0.00307843	0.965849	0.597746	0.928658	0.0110715	no
YAR015W	ADE1	N-succinyl-5-aminoimidazole-4-carboxamide ribotide synthetase; required for 'de novo' purine nucleotide biosynthesis; red pigment accumulates in mutant cells deprived of adenine; protein abundance increases in response to DNA replication stress	1.11437	0.867255	1.10381	1.11104	0.966444	1.23006	1.23811	0.548287	0.417308	0.554341	0.65459	0.89268	0.213686	0.16048	Gcn4
YAR018C	KIN3	Nonessential serine/threonine protein kinase; possible role in DNA damage response; influences tolerance to high levels of ethanol	1.0311	0.692342	0.981537	0.682154	0.713875	1.01206	0.703369	0.788228	3.67598e-07	0.861734	4.21679e-07	1.0524e-05	0.933195	2.17974e-06	no
YAR019C	CDC15	Protein kinase of the Mitotic Exit Network; localized to the spindle pole bodies at late anaphase; promotes mitotic exit by directly switching on the kinase activity of Dbf2p; required for spindle disassembly after meiosis II; relocalizes to the cytoplasm upon DNA replication stress	1.22206	0.854995	0.858873	0.827676	1.04486	1.04959	1.01147	0.13239	0.272631	0.241688	0.213151	0.833021	0.802928	0.953255	no
YAR019W-A	NA	Dubious open reading frame; unlikely to encode a functional protein, based on available experimental and comparative sequence data; partially overlaps ORF CDC15/YAR019C	1.01798	1.45037	1.41465	1.3786	1.47644	1.44008	1.40338	0.985624	0.606962	0.581783	0.736168	0.61267	0.634187	0.6385	no
YAR020C	PAU7	Member of the seripauperin multigene family; active during alcoholic fermentation, regulated by anaerobiosis, inhibited by oxygen, repressed by heme	0.801065	0.968025	1.07115	0.781854	0.775451	0.858061	0.626316	0.708705	0.966403	0.907488	0.761176	0.68219	0.820751	0.359444	no
YAR023C	NA	Putative integral membrane protein; member of DUP240 gene family	1.00838	1.00235	1.05813	0.852329	1.01075	1.067	0.859473	0.980956	0.995879	0.833058	0.642953	0.982441	0.843851	0.570731	no
YAR027W	UIP3	Putative integral membrane protein of unknown function; interacts with Ulp1p at the nuclear periphery; member of DUP240 gene family	0.874331	0.836969	1.07613	0.811684	0.731788	0.940895	0.70968	0.163601	0.0542492	0.466729	0.0283675	0.00026174	0.622002	2.59111e-05	no
YAR028W	NA	Putative integral membrane protein; member of DUP240 gene family; GFP-fusion protein is induced in response to the DNA-damaging agent MMS	0.907804	0.930213	0.828883	0.726531	0.844451	0.752463	0.659548	0.521521	0.672582	0.129078	0.0107725	0.239297	0.0274922	0.000228663	no
YAR029W	NA	Member of DUP240 gene family but contains no transmembrane domains; green fluorescent protein (GFP)-fusion protein localizes to the cytoplasm in a punctate pattern	1.07084	0.892453	1.12938	1.26807	0.955672	1.20938	1.3579	0.918447	0.866781	0.824615	0.75161	0.957464	0.76669	0.558615	no
YAR030C	NA	Dubious open reading frame; unlikely to encode a functional protein, based on available experimental and comparative sequence data; partially overlaps the uncharacterized ORF YAR029W and the verified gene PRM9	2.58413	0.972254	0.964769	0.430933	2.51243	2.49309	1.11359	0.351972	0.987716	0.973082	0.496337	NA	0.399712	0.941141	no
YAR031W	PRM9	Pheromone-regulated protein; contains 3 predicted transmembrane segments and an FF sequence, a motif involved in COPII binding; member of DUP240 gene family; PRM9 has a paralog, PRM8, that arose from a segmental duplication	0.640318	1.33538	1.38436	0.801378	0.855066	0.886431	0.513137	2.50744e-05	0.0112854	0.00254133	0.116402	0.251813	0.397223	1.74892e-10	no
YAR033W	MST28	Putative integral membrane protein, involved in vesicle formation; forms complex with Mst27p; member of DUP240 gene family; binds COPI and COPII vesicles; MST28 has a paralog, MST27, that arose from a segmental duplication	0.915464	1.0367	1.06549	0.950543	0.949059	0.975418	0.870188	0.557821	0.849359	0.658146	0.826079	0.773336	0.90321	0.306673	no
YAR035C-A	NA	Putative protein of unknown function; identified by gene-trapping, microarray-based expression analysis, and genome-wide homology searching; predicted to have a role in cell budding based on computational "guilt by association" analysis	1.53038	1.23973	2.8129	2.77417	1.89726	4.30481	4.24553	NA	NA	NA	NA	NA	NA	NA	no
YAR035W	YAT1	Outer mitochondrial carnitine acetyltransferase; minor ethanol-inducible enzyme involved in transport of activated acyl groups from the cytoplasm into the mitochondrial matrix; phosphorylated	0.708153	0.778294	0.852363	0.942473	0.551152	0.603603	0.667415	0.106786	0.294268	0.495679	0.88673	0.00292037	0.0174523	0.0476438	no
YAR042W	SWH1	Protein similar to mammalian oxysterol-binding protein; contains ankyrin repeats and FFAT motif; interacts with ER anchor Scs2p at the nucleus-vacuole junction; regulated by sterol binding; SWH1 has a paralog, OSH2, that arose from the whole genome duplication	1.46884	0.799864	0.581711	0.799143	1.17487	0.854442	1.17382	0.000450167	0.0654699	1.59134e-07	0.08754	0.248519	0.269294	0.216242	no
YAR047C	NA	Dubious open reading frame; unlikely to encode a functional protein, based on available experimental and comparative sequence data	NA	NA	NA	NA	NA	NA	NA	NA	NA	NA	NA	NA	NA	NA	no
YAR050W	FLO1	Lectin-like protein involved in flocculation; cell wall protein that binds mannose chains on the surface of other cells, confers floc-forming ability that is chymotrypsin sensitive and heat resistant; important for co-flocculation with other yeasts, mediating interaction with specific species; FLO1 has a paralog, FLO5, that arose from a segmental duplication	2.21694	0.400445	0.590761	0.949162	0.887762	1.30968	2.10423	0.0972756	0.0522416	0.258803	0.959026	0.891363	0.690619	0.126064	no
YAR053W	NA	Dubious open reading frame; unlikely to encode a functional protein, based on available experimental and comparative sequence data	0.406256	2.40283	1	1	0.976165	0.462178	0.494581	NA	NA	NA	NA	NA	NA	NA	no
YAR060C	NA	Dubious open reading frame; unlikely to encode a functional protein, based on available experimental and comparative sequence data; YAR060C has a paralog, YHR212C, that arose from a segmental duplication	0.966632	1.91615	0.880957	0.697658	1.85222	0.851561	0.674378	0.965929	0.188485	0.837217	0.650135	0.248464	0.827593	0.506724	no
YAR064W	NA	Pseudogenic fragment with similarity to flocculins; YAR064W has a paralog, YHR213W-B, that arose from a segmental duplication	0.659215	1.49687	0.986959	0.905776	0.98676	0.650618	0.597101	0.167448	0.191474	0.973181	0.864871	0.982548	0.184339	0.0779243	no
YAR066W	NA	Putative GPI protein; SWAT-GFP and mCherry fusion proteins localize to the endoplasmic reticulum and vacuole respectively; YAR066W has a paralog, YHR214W, that arose from a segmental duplication	1.59422	1.21377	0.457293	1.33648	1.93502	0.729025	2.13064	0.000190967	0.186829	4.17533e-11	0.0394455	3.42114e-08	0.0342071	7.30467e-11	no
YAR068W	NA	Fungal-specific protein of unknown function; induced in respiratory-deficient cells; YAR068W has a paralog, YHR214W-A, that arose from a segmental duplication	1.54197	1.00287	0.486469	1.82888	1.5464	0.750122	2.82009	0.00112303	0.994327	7.06331e-09	1.55755e-06	0.00156934	0.0731595	1.08936e-18	no
YAR069C	NA	Dubious open reading frame; unlikely to encode a protein, based on available experimental and comparative sequence data; YAR069C has a paralog, YHR214C-D, that arose from a segmental duplication	1.0211	1.57241	1.68863	0.481482	1.60558	1.72426	0.49164	0.974872	0.329261	0.193668	0.17599	0.336269	0.248391	0.148087	no
YAR070C	NA	Dubious open reading frame; unlikely to encode a protein, based on available experimental and comparative sequence data; YAR070C has a paralog, YHR214C-B, that arose from a segmental duplication	0.787664	1.97666	1.36035	0.371054	1.55695	1.0715	0.292266	0.754773	0.265122	0.638158	0.202498	0.530457	0.943763	0.0576409	no
YAR071W	PHO11	One of three repressible acid phosphatases; glycoprotein that is transported to the cell surface by the secretory pathway; induced by phosphate starvation and coordinately regulated by PHO4 and PHO2; PHO11 has a paralog, PHO12, that arose from a segmental duplication	1.18949	2.42788	0.303475	0.15089	2.88795	0.360981	0.179482	0.78929	0.0607259	0.00543704	1.03129e-05	0.0259334	0.037392	3.43582e-05	no
YAR073W	IMD1	Nonfunctional protein with homology to IMP dehydrogenase; blocked reading frame, located close to the telomere; not expressed at detectable levels; YAR073W and YAR075W comprise a continuous reading frame in most strains of S, cerevisiae; YAR073W/YAR075W together have a paralog, IMD2, that arose from a segmental duplication	3.45326	0.0307773	0.301051	1.11986	0.106282	1.03961	3.86719	0.101183	0.001555	0.0858594	0.933299	NA	0.978813	0.0639442	no
YAR075W	NA	Non-functional protein with homology IMP dehydrogenase; YAR073W/IMD1 and YAR075W comprise a continuous reading frame in most strains of S, cerevisiae; YAR073W/YAR075W together have a paralog, IMD2, that arose from a segmental duplication	4.01405	0.885703	0.223779	0.466416	3.55526	1	1.87222	NA	NA	NA	NA	NA	NA	NA	no
YBL001C	ECM15	Non-essential protein of unknown function; likely exists as tetramer, may be regulated by the binding of small-molecule ligands (possibly sulfate ions), may have a role in yeast cell-wall biogenesis	1.15724	0.877333	1.03024	1.16228	1.01529	1.19224	1.34504	0.359739	0.433125	0.870208	0.421478	0.954599	0.276948	0.0259507	no
YBL002W	HTB2	Histone H2B; core histone protein required for chromatin assembly and chromosome function; nearly identical to HTB1; Rad6p-Bre1p-Lge1p mediated ubiquitination regulates reassembly after DNA replication, transcriptional activation, meiotic DSB formation and H3 methylation	1.07086	1.31518	1.05951	1.06826	1.40837	1.13458	1.14396	0.566086	0.00172088	0.605103	0.676565	8.83295e-05	0.256624	0.182612	no
YBL003C	HTA2	Histone H2A; core histone protein required for chromatin assembly and chromosome function; one of two nearly identical (see also HTA1) subtypes; DNA damage-dependent phosphorylation by Mec1p facilitates DNA repair; acetylated by Nat4p	1.03343	1.24108	1.08329	1.12363	1.28257	1.1195	1.16119	0.814762	0.0256895	0.470647	0.379574	0.0116442	0.340615	0.149917	no
YBL004W	UTP20	Component of the small-subunit (SSU) processome; SSU processome is involved in the biogenesis of the 18S rRNA	1.12791	1.03218	0.985503	0.999128	1.16421	1.11156	1.12693	0.402525	0.869341	0.931252	0.997307	0.294457	0.49508	0.395398	no
YBL005W	PDR3	Transcriptional activator of the pleiotropic drug resistance network; regulates expression of ATP-binding cassette (ABC) transporters through binding to cis-acting PDRE sites (PDR responsive elements); has a role in response to drugs and organic solvents; post-translationally up-regulated in cells lacking functional mitochondrial genome; involved in diauxic shift; relative distribution to nucleus…	1.20136	0.876739	0.995262	0.986519	1.05328	1.19567	1.18517	0.0160099	0.108556	0.964977	0.934492	0.63462	0.0296044	0.0269761	no
YBL006C	LDB7	Component of the RSC chromatin remodeling complex; interacts with Rsc3p, Rsc30p, Npl6p, and Htl1p to form a module important for a broad range of RSC functions	0.789337	1.34884	1.24933	1.07584	1.06469	0.986142	0.8492	0.120286	0.0370686	0.1223	0.784141	0.770241	0.957781	0.312977	no
YBL006W-A	NA	Dubious open reading frame; unlikely to encode a functional protein, based on available experimental and comparative sequence data; completely overlaps the verified gene LDB7/YBL006C	NA	NA	NA	NA	NA	NA	NA	NA	NA	NA	NA	NA	NA	NA	no
YBL007C	SLA1	Cytoskeletal protein binding protein; required for assembly of the cortical actin cytoskeleton; interacts with proteins regulating actin dynamics and proteins required for endocytosis; found in the nucleus and cell cortex; has 3 SH3 domains	1.01158	0.886799	0.907193	0.976401	0.897069	0.9177	0.987709	0.912099	0.0809354	0.146346	0.855529	0.14834	0.277618	0.90243	no
YBL008W	HIR1	Subunit of the HIR complex; HIR is a nucleosome assembly complex involved in regulation of histone gene transcription; contributes to nucleosome formation, heterochromatic gene silencing, and formation of functional kinetochores	1.06573	0.913512	0.845048	0.906832	0.973559	0.900596	0.96644	0.520437	0.336374	0.0271145	0.360729	0.840639	0.279283	0.762541	no
YBL008W-A	NA	Putative protein of unknown function; identified by fungal homology and RT-PCR	0.387071	1.90135	4.95655	3.19271	0.735957	1.91854	1.23581	NA	0.788195	0.309594	NA	NA	0.736673	0.917645	no
YBL009W	ALK2	Protein kinase; along with its paralog, ALK1, required for proper spindle positioning and nuclear segregation following mitotic arrest, proper organization of cell polarity factors in mitosis, proper localization of formins and polarity factors, and survival in cells that activate spindle assembly checkpoint; phosphorylated in response to DNA damage; ALK2 has a paralog, ALK1, that arose from the …	0.977082	1.09334	0.998076	0.938369	1.06829	0.975203	0.916864	0.854789	0.38149	0.984427	0.650135	0.568064	0.852629	0.383981	no
YBL010C	NA	Putative protein of unknown function; green fluorescent protein (GFP)-fusion protein colocalizes with clathrin-coated vesicles	0.976777	1.0872	1.17631	0.982972	1.06195	1.149	0.960144	0.920141	0.692395	0.302544	0.961263	0.796028	0.460002	0.854169	no
YBL011W	SCT1	Glycerol 3-phosphate/dihydroxyacetone phosphate sn-1 acyltransferase; dual substrate-specific acyltransferase of the glycerolipid biosynthesis pathway; prefers 16-carbon fatty acids; similar to Gpt2p; gene is constitutively transcribed	1.02518	0.975304	0.897462	0.908137	0.999861	0.920059	0.931003	0.824579	0.839163	0.177227	0.357868	0.998765	0.389857	0.442994	no
YBL012C	NA	Dubious open reading frame; unlikely to encode a functional protein, based on available experimental and comparative sequence data	2.01053	0.676628	1.37997	0.96423	1.36038	2.77448	1.93862	NA	0.877485	0.871815	NA	NA	0.658068	0.775873	no
YBL013W	FMT1	Methionyl-tRNA formyltransferase; catalyzes the formylation of initiator Met-tRNA in mitochondria; potential Cdc28p substrate	0.823391	1.26645	1.22136	0.845227	1.04278	1.00565	0.695953	0.547143	0.459692	0.49132	0.714783	0.93112	0.990971	0.208669	no
YBL014C	RRN6	Component of the core factor (CF) rDNA transcription factor complex; CF is required for transcription of 35S rRNA genes by RNA polymerase I and is composed of Rrn6p, Rrn7p, and Rrn11p	1.09382	1.12173	1.11666	1.05005	1.22697	1.22143	1.14857	0.395582	0.248492	0.227287	0.758093	0.0263712	0.0330837	0.142993	no
YBL015W	ACH1	Protein with CoA transferase activity; particularly for CoASH transfer from succinyl-CoA to acetate; has minor acetyl-CoA-hydrolase activity; phosphorylated; required for acetate utilization and for diploid pseudohyphal growth	0.712744	1.47144	1.44685	1.11928	1.04876	1.03123	0.797762	0.0035777	0.000523254	0.00083361	0.542866	0.799796	0.875042	0.069794	no
YBL016W	FUS3	Mitogen-activated serine/threonine protein kinase involved in mating; phosphoactivated by Ste7p; substrates include Ste12p, Far1p, Bni1p, Sst2p; inhibits invasive growth during mating by phosphorylating Tec1p, promoting its; inhibits recruitment of Ste5p, Cdc42p-mediated asymmetry and mating morphogenesis	0.912236	1.00073	1.19178	1.13276	0.912901	1.08719	1.03334	0.264626	0.996386	0.00941957	0.135515	0.300461	0.34051	0.743053	no
YBL017C	PEP1	Type I transmembrane sorting receptor for multiple vacuolar hydrolases; cycles between the late-Golgi and prevacuolar endosome-like compartments	1.12769	1.02378	1.0401	1.02744	1.1545	1.1729	1.15863	0.192158	0.860024	0.70286	0.871028	0.127205	0.0852737	0.0913814	no
YBL018C	POP8	Subunit of both RNase MRP and nuclear RNase P; RNase MRP cleaves pre-rRNA, while nuclear RNase P cleaves tRNA precursors to generate mature 5' ends and facilitates turnover of nuclear RNAs; relocalizes to the cytosol in response to hypoxia	1.23362	0.789778	0.74888	1.07879	0.97429	0.923837	1.33083	0.0391551	0.0162505	0.0016871	0.638646	0.883524	0.565701	0.00255523	no
YBL019W	APN2	Class II abasic (AP) endonuclease involved in repair of DNA damage; homolog of human HAP1 and E, coli exoIII	1.04228	1.03841	1.06574	0.930237	1.08232	1.1108	0.969567	0.788994	0.825323	0.620248	0.699114	0.60727	0.45022	0.851242	no
YBL020W	RFT1	Membrane protein required for translocation of Man5GlcNac2-PP-Dol; required for translocation of Man5GlcNac2-PP-Dol from the cytoplasmic side to the lumenal side of the ER membrane but is not the flippase; mutation is suppressed by expression of human p53 protein; essential gene	1.07012	1.0091	1.04058	0.93784	1.07986	1.11354	1.0036	0.348756	0.926781	0.577321	0.463694	0.310897	0.121121	0.970764	no
YBL021C	HAP3	Subunit of the Hap2p/3p/4p/5p CCAAT-binding complex; complex is heme-activated and glucose-repressed; complex is a transcriptional activator and global regulator of respiratory gene expression; contains sequences contributing to both complex assembly and DNA binding	0.965805	1.03204	0.805907	0.955309	0.996752	0.778349	0.922642	0.808891	0.841474	0.0256313	0.809476	0.986703	0.0186658	0.512722	no
YBL022C	PIM1	ATP-dependent Lon protease; involved in degradation of misfolded proteins in mitochondria; required for biogenesis and maintenance of mitochondria	0.883973	0.896079	0.858858	0.880918	0.79211	0.759207	0.778707	0.37706	0.458329	0.217186	0.447181	0.0663523	0.0262735	0.0323918	no
YBL023C	MCM2	Protein involved in DNA replication; component of the Mcm2-7 hexameric helicase complex that binds chromatin as a part of the pre-replicative complex; relative distribution to the nucleus increases upon DNA replication stress	0.90268	0.976392	0.990133	0.895259	0.88137	0.893773	0.808133	0.340309	0.870306	0.93907	0.378701	0.247193	0.310126	0.0188622	no
YBL024W	NCL1	S-adenosyl-L-methionine-dependent tRNA: m5C-methyltransferase; methylates cytosine to m5C at several positions in tRNAs and intron-containing pre-tRNAs; increases proportion of tRNALeu(CAA) with m5C at wobble position in response to hydrogen peroxide, causing selective translation of mRNA from genes enriched in TTG codon; loss of NCL1 confers hypersensitivity to oxidative stress; similar to Nop2p…	1.02728	1.04304	1.08993	0.990372	1.0715	1.11966	1.01739	0.863491	0.790697	0.466657	0.968594	0.63462	0.378352	0.913414	no
YBL025W	RRN10	Protein involved in promoting high level transcription of rDNA; subunit of UAF (upstream activation factor) for RNA polymerase I	0.845446	1.19833	1.66817	1.08199	1.01312	1.41035	0.91476	0.42133	0.389662	0.00105297	0.811999	0.971604	0.0653237	0.703719	no
YBL026W	LSM2	Lsm (Like Sm) protein; part of heteroheptameric complexes (Lsm2p-7p and either Lsm1p or 8p): cytoplasmic Lsm1p complex involved in mRNA decay; nuclear Lsm8p complex part of U6 snRNP and possibly involved in processing tRNA, snoRNA, and rRNA; relocalizes from nucleus to cytoplasmic foci upon DNA replication stress	0.766691	1.14536	1.20109	1.08137	0.878139	0.920867	0.829077	0.10462	0.492614	0.265982	0.784585	0.527779	0.71339	0.278074	no
YBL027W	RPL19B	Ribosomal 60S subunit protein L19B; rpl19a and rpl19b single null mutations result in slow growth, while the double null mutation is lethal; homologous to mammalian ribosomal protein L19, no bacterial homolog; RPL19B has a paralog, RPL19A, that arose from the whole genome duplication	0.930003	1.04816	0.981627	1.08305	0.974796	0.912916	1.00724	0.390442	0.627002	0.843068	0.4184	0.82206	0.282653	0.947851	no
YBL028C	NA	Protein of unknown function that may interact with ribosomes; green fluorescent protein (GFP)-fusion protein localizes to the nucleolus; predicted to be involved in ribosome biogenesis	1.0389	1.11312	1.17521	1.01477	1.15641	1.22092	1.05425	0.783475	0.361062	0.0981764	0.944392	0.200864	0.0609895	0.688046	no
YBL029C-A	NA	Protein of unknown function; green fluorescent protein (GFP)-fusion protein localizes to the cell periphery; protein abundance increases in response to DNA replication stress; has potential orthologs in Saccharomyces species and in Yarrowia lipolytica	0.806285	1.11497	1.05592	0.942444	0.898987	0.851376	0.759878	0.386687	0.723018	0.844474	0.889293	0.727206	0.567526	0.235236	no
YBL029W	NA	Non-essential protein of unknown function	1.07982	1.09171	1.20728	0.713037	1.17885	1.30364	0.769952	0.666065	0.622764	0.153054	0.0172963	0.316136	0.0676238	0.0704115	no
YBL030C	PET9	Major ADP/ATP carrier of the mitochondrial inner membrane; exchanges cytosolic ADP for mitochondrially synthesized ATP; also imports heme and ATP; required for viability in many lab strains that carry a sal1 mutation; PET9 has a paralog, AAC3, that arose from the whole genome duplication; human homolog SLC25A4 implicated in progressive external ophthalmoplegia can complement yeast null mutant	1.21519	0.941455	1.46348	0.899549	1.14405	1.77841	1.09313	0.053301	0.661318	1.28618e-05	0.44667	0.246523	3.22478e-11	0.446474	no
YBL031W	SHE1	Mitotic spindle protein; interacts with components of the Dam1 (DASH) complex, its effector Sli15p, and microtubule-associated protein Bim1p; also localizes to nuclear microtubules and to the bud neck in a ring-shaped structure; inhibits dynein function	1.08352	1.07632	1.04912	0.876959	1.16621	1.13674	0.950199	0.621447	0.665543	0.752075	0.45619	0.311487	0.409639	0.773748	no
YBL032W	HEK2	RNA binding protein involved in asymmetric localization of ASH1 mRNA; represses translation of ASH1 mRNA, an effect reversed by Yck1p-dependent phosphoryation; regulates telomere position effect and length; similarity to hnRNP-K	0.88188	1.08469	1.11605	0.953917	0.956563	0.984224	0.84124	0.0614422	0.280888	0.0906043	0.66681	0.626694	0.882182	0.00578917	no
YBL033C	RIB1	GTP cyclohydrolase II; catalyzes the first step of the riboflavin biosynthesis pathway	1.3827	0.628863	0.612566	1.4514	0.869527	0.846993	2.00685	7.24235e-05	2.76239e-09	3.01314e-10	2.27676e-06	0.193789	0.109285	4.96827e-21	Gcn4
YBL034C	STU1	Component of the mitotic spindle; binds to interpolar microtubules via its association with beta-tubulin (Tub2p); required for interpolar microtubules to provide an outward force on the spindle poles	0.939607	1.1584	1.11695	0.914483	1.08844	1.04949	0.859255	0.624962	0.162842	0.27953	0.547534	0.510128	0.736673	0.152022	no
YBL035C	POL12	B subunit of DNA polymerase alpha-primase complex; required for initiation of DNA replication during mitotic and premeiotic DNA synthesis; also functions in telomere capping and length regulation	0.880427	1.10491	0.954362	0.912214	0.972796	0.840246	0.803138	0.236722	0.391264	0.695249	0.527239	0.866286	0.107482	0.0221979	no
YBL036C	NA	Putative non-specific single-domain racemase; based on structural similarity; binds pyridoxal 5'-phosphate; expression of GFP-fusion protein induced in response to the DNA-damaging agent MMS	0.859563	1.17774	1.32143	0.993646	1.01234	1.13586	0.854101	0.0597922	0.0372668	5.90348e-05	0.971405	0.935196	0.149163	0.0457016	no
YBL037W	APL3	Alpha-adaptin; large subunit of the clathrin associated protein complex (AP-2); involved in vesicle mediated transport	0.948007	0.878108	0.877177	0.929568	0.832452	0.83157	0.881237	0.669523	0.223833	0.178512	0.634504	0.0784734	0.0777709	0.226633	no
YBL038W	MRPL16	Mitochondrial ribosomal protein of the large subunit; homologous to bacterial L16 ribosomal protein; synthetic lethality with hac1 mutation suggests a possible role in synthesis of precursors for protein glycosylation	0.97508	0.709265	0.726187	0.751081	0.69159	0.70809	0.732363	0.913678	0.0181688	0.0237474	0.0824578	0.0145976	0.0270159	0.0344018	no
YBL039C	URA7	Major CTP synthase isozyme (see also URA8); catalyzes the ATP-dependent transfer of the amide nitrogen from glutamine to UTP, forming CTP, the final step in de novo biosynthesis of pyrimidines; involved in phospholipid biosynthesis; capable of forming cytoplasmic filaments termed cytoophidium, especially during conditions of glucose depletion; URA7 has a paralog, URA8, that arose from the whole g…	1.2116	0.926863	1.00302	1.001	1.12298	1.21525	1.21281	0.0264525	0.490432	0.980111	0.995756	0.258267	0.0338691	0.023357	no
YBL039C-A	NA	Dubious open reading frame; unlikely to encode a functional protein, based on available experimental and comparative sequence data; completely overlaps the verified ORF URA7; identified by expression profiling and mass spectrometry	NA	NA	NA	NA	NA	NA	NA	NA	NA	NA	NA	NA	NA	NA	no
YBL039W-B	NA	Putative protein of unknown function; mCherry fusion protein localizes to the vacuole	0.676111	0.808084	1.39073	1.17659	0.546354	0.940288	0.795508	0.402525	0.711804	0.456797	0.831783	0.183811	0.928658	0.657443	no
YBL040C	ERD2	HDEL receptor; an integral membrane protein that binds to the HDEL motif in proteins destined for retention in the endoplasmic reticulum; has a role in maintenance of normal levels of ER-resident proteins	0.836177	1.1151	1.2343	1.09539	0.932422	1.0321	0.915941	0.00553376	0.132108	0.00049317	0.295249	0.408513	0.750911	0.235523	no
YBL041W	PRE7	Beta 6 subunit of the 20S proteasome	0.694763	1.18412	1.40179	0.997398	0.822682	0.973911	0.692955	4.80789e-06	0.065719	1.97738e-05	0.987806	0.0358786	0.850712	3.45455e-06	no
YBL042C	FUI1	High affinity uridine permease, localizes to the plasma membrane; also mediates low but significant transport of the cytotoxic nucleoside analog 5-fluorouridine; not involved in uracil transport; relative distribution to the vacuole increases upon DNA replication stress	1.54926	0.696273	0.866048	1.24476	1.07871	1.34174	1.92846	6.50562e-10	3.39045e-07	0.0698411	0.00579748	0.483409	0.000224191	3.78942e-22	no
YBL043W	ECM13	Non-essential protein of unknown function; induced by treatment with 8-methoxypsoralen and UVA irradiation; ECM13 has a paralog, YJR115W, that arose from the whole genome duplication	3.47048	0.279964	0.277383	2.03251	0.971607	0.962652	7.05379	8.72812e-15	1.15854e-15	1.06209e-15	2.56125e-05	0.938563	0.90866	8.27431e-37	no
YBL044W	NA	Putative protein of unknown function; YBL044W is not an essential protein	0.807709	1.4265	1.5168	0.790513	1.1522	1.22513	0.638505	0.821877	0.700635	0.577321	0.865538	NA	0.838713	0.617199	no
YBL045C	COR1	Core subunit of the ubiquinol-cytochrome c reductase complex; the ubiquinol-cytochrome c reductase complex (bc1 complex) is a component of the mitochondrial inner membrane electron transport chain	1.09914	1.04584	0.966824	0.938872	1.14952	1.06268	1.03195	0.561073	0.824764	0.841172	0.790598	0.382586	0.750911	0.870323	no
YBL046W	PSY4	Regulatory subunit of protein phosphatase PP4; presence of Psy4p in the PP4 complex (along with catalytic subunit Pph3p and Psy2p) is required for dephosphorylation of the histone variant H2AX, but not for dephosphorylation of Rad53p, during recovery from the DNA damage checkpoint; localization is cell-cycle dependent and regulated by Cdc28p phosphorylation; required for cisplatin resistance; hom…	0.934327	1.08394	1.05949	0.899522	1.01276	0.989912	0.840447	0.523659	0.447127	0.561857	0.36216	0.938563	0.949048	0.0462882	no
YBL047C	EDE1	Scaffold protein involved in the formation of early endocytic sites; putative regulator of cytokinesis; homo-oligomerization is required for localization to and organization of endocytic sites; has a network of interactions with other endocytic proteins; binds membranes in a ubiquitin-dependent manner; may also bind ubiquitinated membrane-associated proteins; interacts with Cmk2 and functions ups…	0.843944	0.960224	0.990266	0.958891	0.810376	0.835729	0.809251	0.026692	0.718436	0.926726	0.76558	0.00620009	0.026449	0.00358325	no
YBL048W	RRT1	Protein of unknown function; identified in a screen for mutants with increased levels of rDNA transcription; dubious open reading frame unlikely to encode a protein, based on experimental and comparative sequence data	1.00084	1.14255	1.53082	0.885349	1.14352	1.5321	0.886095	0.998764	0.733648	0.0997221	0.816851	0.736368	0.159128	0.757633	no
YBL049W	MOH1	Protein of unknown function, essential for stationary phase survival; not required for growth on nonfermentable carbon sources; possibly linked with vacuolar transport	0.890734	0.954187	1.15989	1.04131	0.849926	1.03316	0.927526	0.694035	0.896115	0.556183	0.930414	0.593085	0.932144	0.808808	no
YBL050W	SEC17	Alpha-SNAP cochaperone; SNARE-complex adaptor for Sec18 (NSF) during the disassembly of postfusion cis-SNARE complexes; stimulates the ATPase activity of Sec18p; peripheral membrane protein required for vesicular transport between ER and Golgi, the 'priming' step in homotypic vacuole fusion, and autophagy; similar to mammalian alpha-SNAP	0.814089	1.0445	1.00569	1.0169	0.850312	0.818718	0.827844	0.00132124	0.646706	0.954245	0.906791	0.0219669	0.00382393	0.00355504	no
YBL051C	PIN4	Protein involved in G2/M phase progression and response to DNA damage; interacts with Rad53p; contains an RNA recognition motif, a nuclear localization signal, and several SQ/TQ cluster domains; hyperphosphorylated in response to DNA damage	1.08614	1.00939	0.916479	0.905009	1.09635	0.995428	0.98297	0.399261	0.947195	0.325844	0.369396	0.368544	0.976895	0.892528	no
YBL052C	SAS3	Histone acetyltransferase catalytic subunit of NuA3 complex; acetylates histone H3, involved in transcriptional silencing; homolog of the mammalian MOZ proto-oncogene; mutant has aneuploidy tolerance; sas3gcn5 double mutation is lethal	1.19866	0.91662	0.897019	0.915061	1.09872	1.07522	1.09685	0.141835	0.562815	0.38375	0.631039	0.54572	0.657949	0.512722	no
YBL053W	NA	Dubious open reading frame; unlikely to encode a functional protein, based on available experimental and comparative sequence data	1.34901	0.906873	0.640632	0.399174	1.22338	0.864221	0.538491	NA	0.954482	0.727223	NA	NA	0.94015	0.684687	no
YBL054W	TOD6	PAC motif binding protein involved in rRNA and ribosome biogenesis; subunit of the RPD3L histone deacetylase complex; Myb-like HTH transcription factor; hypophosphorylated by rapamycin treatment in a Sch9p-dependent manner; activated in stochastic pulses of nuclear localization	1.17411	1.04611	1.01223	1.05597	1.22825	1.18846	1.23982	0.0512454	0.693144	0.910558	0.689622	0.0116803	0.0455028	0.00485883	no
YBL055C	NA	3'-->5' exonuclease and endonuclease with a possible role in apoptosis; has similarity to mammalian and C, elegans apoptotic nucleases	0.92159	1.13343	1.12543	1.0909	1.04456	1.03719	1.00536	0.499277	0.263175	0.252531	0.561053	0.766967	0.80836	0.971445	no
YBL056W	PTC3	Type 2C protein phosphatase (PP2C); dephosphorylates Hog1p (see also Ptc2p) to limit maximal kinase activity induced by osmotic stress; dephosphorylates T169 phosphorylated Cdc28p (see also Ptc2p); role in DNA damage checkpoint inactivation; PTC3 has a paralog, PTC2, that arose from the whole genome duplication	0.900416	1.02735	1.03948	1.02371	0.92504	0.935967	0.921763	0.0972528	0.765194	0.584756	0.841651	0.281402	0.370191	0.21756	no
YBL057C	PTH2	One of two mitochondrially-localized peptidyl-tRNA hydrolases; negatively regulates the ubiquitin-proteasome pathway via interactions with ubiquitin-like ubiquitin-associated proteins; dispensable for cell growth; see also PTH1	0.851628	1.08524	1.43311	1.12686	0.924218	1.22048	0.959666	0.0718322	0.446725	1.4746e-06	0.276636	0.483409	0.0259067	0.723882	no
YBL058W	SHP1	UBX domain-containing substrate adaptor for Cdc48p; ubiquitin regulatory X domain-containing protein that acts as a substrate recruiting cofactor for Cdc48p; positively regulates Glc7p PPase activity to promote growth and mitotic progression in complex with Cdc48p; ubiquitinated protein interactor involved in ER-associated degradation (ERAD); regulated by nuclear Ub-dependent degradation (INMAD p…	0.682268	1.11052	1.31524	0.950862	0.75767	0.897348	0.648743	4.05209e-09	0.210875	3.89677e-05	0.695188	6.07518e-05	0.209025	1.35084e-11	no
YBL059C-A	CMC2	Protein involved in respiratory chain complex assembly or maintenance; protein of the mitochondrial intermembrane space; contains twin Cx9C motifs that can form coiled coil-helix-coiled-coil helix fold	0.950658	0.817402	0.965975	0.938331	0.77707	0.918312	0.892032	0.825134	0.276888	0.871624	0.839042	0.171802	0.71339	0.566972	no
YBL059W	NA	Putative protein of unknown function; the authentic, non-tagged protein is detected in highly purified mitochondria in high-throughput studies; YBL059W has a paralog, YER093C-A, that arose from the whole genome duplication	0.901653	1.17526	1.22638	0.863906	1.05967	1.10577	0.778944	0.519055	0.272226	0.108324	0.423768	0.76418	0.554404	0.0635223	no
YBL060W	YEL1	Guanine nucleotide exchange factor specific for Arf3p; localized to the bud neck and tip; required for localization of Arf3p to the bud neck and tip	1.1228	0.96483	0.956341	0.919824	1.08331	1.07378	1.03278	0.311639	0.81508	0.713621	0.585957	0.553476	0.604918	0.824188	no
YBL061C	SKT5	Activator of Chs3p (chitin synthase III) during vegetative growth; recruits Chs3p to the bud neck via interaction with Bni4p; SKT5 has a paralog, SHC1, that arose from the whole genome duplication	1.08926	0.984595	0.95864	0.931603	1.07248	1.04421	1.01476	0.46008	0.919055	0.719903	0.650135	0.597541	0.765144	0.919119	no
YBL062W	NA	Dubious open reading frame; unlikely to encode a functional protein, based on available experimental and comparative sequence data	NA	NA	NA	NA	NA	NA	NA	NA	NA	NA	NA	NA	NA	NA	no
YBL063W	KIP1	Kinesin-related motor protein; required for mitotic spindle assembly, chromosome segregation, and 2 micron plasmid partitioning; functionally redundant with Cin8p for chromosomal but not plasmid functions	1.06206	1.34047	0.92518	0.977097	1.42366	0.9826	1.03774	0.708994	0.00820958	0.575027	0.926977	0.00198267	0.933369	0.828962	no
YBL064C	PRX1	Mitochondrial peroxiredoxin with thioredoxin peroxidase activity; has a role in reduction of hydroperoxides; reactivation requires Trr2p and glutathione; induced during respiratory growth and oxidative stress; phosphorylated; protein abundance increases in response to DNA replication stress	0.622899	1.41137	2.09234	0.92954	0.879138	1.30332	0.579009	9.31284e-05	0.00672789	6.47259e-11	0.768837	0.442574	0.0592628	4.66108e-06	no
YBL065W	NA	Dubious open reading frame; unlikely to encode a functional protein, based on available experimental and comparative sequence data; partially overlaps verified ORF SEF1/YBL066C; YBL065W is a non-essential gene	1	2.4028	1	1	1.89719	1	1	NA	NA	NA	NA	NA	NA	NA	no
YBL066C	SEF1	Putative transcription factor; has homolog in Kluyveromyces lactis	1.21846	1.12618	0.784037	0.959419	1.3722	0.95532	1.16902	0.119176	0.40473	0.0337957	0.86086	0.00829776	0.806544	0.238071	no
YBL067C	UBP13	Ubiquitin-specific protease that cleaves Ub-protein fusions; UBP13 has a paralog, UBP9, that arose from the whole genome duplication	1.0096	1.08493	0.961215	0.791678	1.09535	0.970447	0.799281	0.918307	0.203714	0.559712	2.48624e-05	0.174678	0.729087	3.9244e-05	no
YBL068W	PRS4	5-phospho-ribosyl-1(alpha)-pyrophosphate synthetase, synthesizes PRPP; which is required for nucleotide, histidine, and tryptophan biosynthesis; one of five related enzymes, which are active as heteromultimeric complexes; PRS4 has a paralog, PRS2, that arose from the whole genome duplication; a missense mutation in the conserved residue R196 of its human homolog PRPS1 is pathogenic	1.05796	1.05549	0.966671	1.09119	1.11667	1.0227	1.15444	0.620539	0.654512	0.753824	0.484831	0.291641	0.874027	0.114884	no
YBL068W-A	NA	Dubious open reading frame; unlikely to encode a functional protein, based on available experimental and comparative sequence data; identified by fungal homology and RT-PCR	NA	NA	NA	NA	NA	NA	NA	NA	NA	NA	NA	NA	NA	NA	no
YBL069W	AST1	Lipid raft associated protein; interacts with the plasma membrane ATPase Pma1p and has a role in its targeting to the plasma membrane by influencing its incorporation into lipid rafts; sometimes classified in the medium-chain dehydrogenase/reductases (MDRs) superfamily; AST1 has a paralog, AST2, that arose from the whole genome duplication	1.01264	1.08975	1.00167	1.14604	1.10352	1.01434	1.16053	0.966031	0.738598	0.992943	0.632329	0.694663	0.965681	0.480445	no
YBL070C	NA	Dubious open reading frame; unlikely to encode a functional protein, based on available experimental and comparative sequence data	2.97602	0.637491	0.301833	0.322994	1.89719	1	1	NA	NA	NA	NA	NA	NA	NA	no
YBL071C	NA	Putative protein of unknown function; conserved among S, cerevisiae strains; YBL071C is not an essential gene	1.13813	1.14453	1.34226	1.43394	1.30262	1.52767	1.63201	0.673266	0.671333	0.206914	0.176537	0.353	0.0935049	0.0301459	no
YBL071C-B	NA	Putative protein of unknown function; identified by gene-trapping, microarray-based expression analysis, and genome-wide homology searching	0.37154	2.09702	3.54988	0.611729	0.779127	1.31892	0.227282	NA	0.62419	0.261675	NA	NA	0.855197	0.290064	no
YBL071W-A	KTI11	Zn-ribbon protein that co-purifies with Dph1 and Dph2; in a complex required for synthesis of diphthamide on translation factor eEF2 and with Elongator subunits Iki3p, Elp2p, and Elp3p; involved in modification of wobble nucleosides in tRNAs; forms a stable heterodimer with Ats1p	1.1433	1.06782	1.12445	1.41404	1.22085	1.28559	1.61668	0.623209	0.839389	0.634758	0.142266	0.456734	0.315202	0.0169971	no
YBL072C	RPS8A	Protein component of the small (40S) ribosomal subunit; homologous to mammalian ribosomal protein S8, no bacterial homolog; RPS8A has a paralog, RPS8B, that arose from the whole genome duplication	0.945941	0.996082	0.967954	1.04876	0.942235	0.915628	0.992063	0.561698	0.979178	0.727273	0.718982	0.5561	0.33469	0.945122	no
YBL073W	NA	Dubious open reading frame; unlikely to encode a functional protein, based on available experimental and comparative sequence data; partially overlaps the essential gene AAR2/YBL074C	0.198684	0.633413	1.99071	3.00091	0.125849	0.395521	0.596231	NA	NA	NA	NA	NA	NA	NA	no
YBL074C	AAR2	Component of the U5 snRNP complex; required for splicing of U3 precursors; originally described as a splicing factor specifically required for splicing pre-mRNA of the MATa1 cistron	0.861426	1.1216	1.3655	1.133	0.966178	1.17628	0.975997	0.571941	0.699795	0.128125	0.732761	0.931027	0.548143	0.93938	no
YBL075C	SSA3	ATPase involved in protein folding and the response to stress; plays a role in SRP-dependent cotranslational protein-membrane targeting and translocation; member of the heat shock protein 70 (HSP70) family; localized to the cytoplasm; SSA3 has a paralog, SSA4, that arose from the whole genome duplication	1.64794	1.05252	0.569931	0.489693	1.73449	0.93921	0.806982	0.30818	0.943188	0.203426	0.151446	0.277412	0.933195	0.70731	no
YBL076C	ILS1	Cytoplasmic isoleucine-tRNA synthetase; target of the G1-specific inhibitor reveromycin A	1.41658	0.685156	0.782855	1.17114	0.970577	1.10898	1.65902	8.03813e-07	4.04772e-08	0.00069049	0.0697963	0.81242	0.275606	4.36418e-14	no
YBL077W	NA	Dubious open reading frame; unlikely to encode a functional protein, based on available experimental and comparative sequence data; partially overlaps the verified gene ILS1/YBL076C	0.405385	1	1	1	0.500128	0.461187	0.49352	NA	NA	NA	NA	NA	NA	NA	no
YBL078C	ATG8	Component of autophagosomes and Cvt vesicles; regulator of Atg1p, targets it to autophagosomes; binds the Atg1p-Atg13p complex, triggering its vacuolar degradation; unique ubiquitin-like protein whose conjugation target is lipid phosphatidylethanolamine (PE); Atg8p-PE is anchored to membranes, is involved in phagophore expansion, and may mediate membrane fusion during autophagosome formation; dec…	0.475128	1.44533	1.69827	0.963935	0.686719	0.806895	0.457993	1.16579e-05	0.0611247	0.00234455	0.930414	0.0590379	0.335787	4.43779e-06	no
YBL079W	NUP170	Subunit of inner ring of nuclear pore complex (NPC); contributes to NPC assembly and nucleocytoplasmic transport; interacts with genomic regions that contain ribosomal protein and subtelomeric genes, where it functions in nucleosome positioning and as a repressor of transcription; both Nup170p and NUP157p are similar to human Nup155p; NUP170 has a paralog, NUP157, that arose from the whole genome…	1.10633	0.943371	0.897318	1.00656	1.04368	0.992732	1.11359	0.272112	0.58901	0.195477	0.971405	0.716131	0.962422	0.226899	no
YBL080C	PET112	Subunit of the trimeric GatFAB AmidoTransferase(AdT) complex; involved in the formation of Q-tRNAQ; mutation is functionally complemented by the bacterial GatB ortholog	0.986938	0.706437	0.644558	0.843979	0.69721	0.636139	0.832955	0.955367	0.0121694	0.000769334	0.374697	0.0140172	0.0017042	0.243495	no
YBL081W	NA	Non-essential protein of unknown function; null mutation results in a decrease in plasma membrane electron transport	1.1675	1.03892	1.14422	1.06782	1.21294	1.33589	1.24668	0.138422	0.797791	0.175327	0.69064	0.0665119	0.00308172	0.0210016	no
YBL082C	ALG3	Dolichol-P-Man dependent alpha(1-3) mannosyltransferase; involved in synthesis of dolichol-linked oligosaccharide donor for N-linked glycosylation of proteins; G353A missense mutation in human ortholog ALG3 implicated in carbohydrate deficient glycoprotein syndrome type IV, which is characterized by microcephaly, severe epilepsy, minimal psychomotor development, partial deficiency of sialic acids…	1.01051	1.01901	0.878864	1.03031	1.02972	0.8881	1.04114	0.947445	0.906842	0.197532	0.878166	0.857075	0.309901	0.765746	no
YBL083C	NA	Dubious open reading frame; unlikely to encode a functional protein, based on available experimental and comparative sequence data; overlaps verified ORF ALG3	NA	NA	NA	NA	NA	NA	NA	NA	NA	NA	NA	NA	NA	NA	no
YBL084C	CDC27	Subunit of the Anaphase-Promoting Complex/Cyclosome (APC/C); APC/C is a ubiquitin-protein ligase required for degradation of anaphase inhibitors, including mitotic cyclins, during the metaphase/anaphase transition	1.00497	1.12982	0.908037	0.951394	1.13543	0.912548	0.95612	0.974872	0.268985	0.361974	0.781214	0.27453	0.464364	0.74093	no
YBL085W	BOI1	Protein implicated in polar growth; functionally redundant with Boi2p; interacts with bud-emergence protein Bem1p; contains an SH3 (src homology 3) domain and a PH (pleckstrin homology) domain; relocalizes from bud neck to cytoplasm upon DNA replication stress; BOI1 has a paralog, BOI2, that arose from the whole genome duplication	1.00073	1.09138	0.941143	0.972553	1.09218	0.941833	0.973267	0.996743	0.274865	0.43818	0.839042	0.296594	0.512196	0.784165	no
YBL086C	NA	Protein of unknown function; green fluorescent protein (GFP)-fusion protein localizes to the cell periphery	0.999932	0.94334	0.904018	1.10162	0.943276	0.903956	1.10155	0.999372	0.702994	0.386449	0.542289	0.705564	0.458329	0.444476	no
YBL087C	RPL23A	Ribosomal 60S subunit protein L23A; homologous to mammalian ribosomal protein L23 and bacterial L14; RPL23A has a paralog, RPL23B, that arose from the whole genome duplication	0.904203	1.09337	0.989876	1.1665	0.988627	0.895049	1.05476	0.141128	0.210607	0.90723	0.0195371	0.9243	0.119734	0.486211	no
YBL088C	TEL1	Protein kinase primarily involved in telomere length regulation; contributes to cell cycle checkpoint control in response to DNA damage; acts with Red1p and Mec1p to promote interhomolog recombination by phosphorylation of Hop1; functionally redundant with Mec1p; regulates P-body formation induced by replication stress; homolog of human ataxia-telangiectasia mutated (ATM) gene	1.06834	1.01746	0.99097	1.04418	1.08699	1.0587	1.11554	0.552513	0.905082	0.940711	0.787499	0.469109	0.646704	0.268226	no
YBL089W	AVT5	Putative transporter; member of a family of seven S, cerevisiae genes (AVT1-7) related to vesicular GABA-glycine transporters; AVT5 has a paralog, AVT6, that arose from the whole genome duplication	1.06379	0.939954	0.986551	1.15347	0.999917	1.04949	1.22706	0.602062	0.616064	0.911628	0.180691	0.999118	0.719394	0.0227944	no
YBL090W	MRP21	Mitochondrial ribosomal protein of the small subunit; MRP21 exhibits genetic interactions with mutations in the COX2 and COX3 mRNA 5'-untranslated leader sequences	1.10335	0.673362	0.750637	0.719365	0.742952	0.828213	0.793709	0.493618	0.000220761	0.00893536	0.00485323	0.0135414	0.161275	0.0528624	no
YBL091C	MAP2	Methionine aminopeptidase; catalyzes the cotranslational removal of N-terminal methionine from nascent polypeptides; function is partially redundant with that of Map1p	0.920884	0.993638	1.19923	1.12661	0.915025	1.10435	1.03748	0.176701	0.947421	0.00030806	0.0476787	0.167349	0.111538	0.606675	no
YBL091C-A	SCS22	Protein involved in regulation of phospholipid metabolism; one of 6 proteins (Ist2p, Scs2p, Scs22p, Tcb1p, Tcb2p, Tcb3p) that connect the ER and plasma membrane (PM); regulates PM PI4P levels by controlling access of the Sac1p phosphatase to its substrate, PI4P; human VAP homolog; similar to D, melanogaster inturned protein; SWAT-GFP and mCherry fusion proteins localize to the cytosol; SCS22 has …	0.913789	0.861898	1.09997	1.12825	0.787593	1.00514	1.03098	0.583375	0.336936	0.515397	0.525079	0.100926	0.983331	0.875191	no
YBL092W	RPL32	Ribosomal 60S subunit protein L32; overexpression disrupts telomeric silencing; homologous to mammalian ribosomal protein L32, no bacterial homolog	0.923233	1.02888	0.969468	1.02615	0.949892	0.895044	0.947376	0.273806	0.76682	0.695514	0.837607	0.549208	0.123056	0.483291	no
YBL093C	ROX3	Subunit of the RNA polymerase II mediator complex; associates with core polymerase subunits to form the RNA polymerase II holoenzyme	0.95426	1.01662	1.0188	1.09987	0.970124	0.972196	1.04957	0.710611	0.913376	0.881351	0.47221	0.842201	0.847921	0.696579	no
YBL094C	NA	Dubious open reading frame; unlikely to encode a functional protein, based on available experimental and comparative sequence data; partially overlaps uncharacterized ORF YBL095W	0.405385	1	1	1	0.500128	0.461187	0.49352	NA	NA	NA	NA	NA	NA	NA	no
YBL095W	MRX3	Protein that associates with mitochondrial ribosome; likely functions in cristae junction formation; the authentic, non-tagged protein is detected in highly purified mitochondria in high-throughput studies	1.2847	0.824103	0.592147	0.861694	1.05872	0.760728	1.10702	0.697572	0.788018	0.315635	0.874645	0.953179	0.703398	0.891184	no
YBL096C	NA	Non-essential protein of unknown function	NA	NA	NA	NA	NA	NA	NA	NA	NA	NA	NA	NA	NA	NA	no
YBL097W	BRN1	Subunit of the condensin complex; required for chromosome condensation and for clustering of tRNA genes at the nucleolus; may influence multiple aspects of chromosome transmission	1.08506	0.94276	0.799513	0.831271	1.02295	0.867521	0.901981	0.742503	0.835089	0.236708	0.475153	0.947995	0.562492	0.671312	no
YBL098W	BNA4	Kynurenine 3-monooxygenase; required for the de novo biosynthesis of NAD from tryptophan via kynurenine; expression regulated by Hst1p; putative therapeutic target for Huntington disease	1.91205	0.451372	0.741046	1.33931	0.863048	1.41692	2.56084	5.79326e-10	8.30071e-15	0.006827	0.0151186	0.331364	0.00467743	6.44563e-21	Gcn4
YBL099W	ATP1	Alpha subunit of the F1 sector of mitochondrial F1F0 ATP synthase; which is a large, evolutionarily conserved enzyme complex required for ATP synthesis; F1 translationally regulates ATP6 and ATP8 expression to achieve a balanced output of ATP synthase genes encoded in nucleus and mitochondria; phosphorylated; N-terminally propionylated in vivo	1.21382	0.966458	0.974581	0.891108	1.1731	1.18296	1.08164	0.0786419	0.838606	0.853671	0.43853	0.189612	0.165288	0.548672	no
YBL100C	NA	Dubious open reading frame; unlikely to encode a functional protein, based on available experimental and comparative sequence data; almost completely overlaps the 5' end of ATP1	0.998974	0.990356	0.761245	1.01301	0.98934	0.760464	1.01197	0.999294	0.994902	0.709755	0.990835	0.991747	0.757247	0.989288	no
YBL100W-C	NA	Putative protein of unknown function; identified by gene-trapping, microarray-based expression analysis, and genome-wide homology searching	0.395499	2.15453	0.543537	0.347167	0.852116	0.214969	0.137304	0.417057	0.540123	0.641095	0.559291	NA	0.203664	0.0952962	no
YBL101C	ECM21	Protein involved in regulating endocytosis of plasma membrane proteins; identified as a substrate for ubiquitination by Rsp5p and deubiquitination by Ubp2p; promoter contains several Gcn4p binding elements; ECM21 has a paralog, CSR2, that arose from the whole genome duplication	0.996106	0.885482	0.955224	1.23355	0.882034	0.951504	1.22875	0.981479	0.307011	0.714122	0.0503905	0.316823	0.742357	0.0402436	Gcn4
YBL102W	SFT2	Tetra-spanning membrane protein found mostly in the late Golgi; non-essential; can suppress some sed5 alleles; may be part of the transport machinery, but precise function is unknown; similar to mammalian syntaxin 5	1.37086	0.612471	0.778155	1.42501	0.83961	1.06674	1.95349	0.00188811	1.94503e-07	0.0131013	0.000481544	0.158948	0.674539	1.57513e-13	Gcn4
YBL103C	RTG3	bHLH/Zip transcription factor for retrograde (RTG) and TOR pathways; forms a complex with another bHLH/Zip protein, Rtg1p, to activate the pathways; target of Hog1p	1.39941	0.681089	0.651368	1.41882	0.953125	0.911532	1.98552	1.88582e-05	4.65293e-07	1.39299e-08	5.88257e-06	0.710061	0.405811	1.53805e-21	Gcn4
YBL104C	SEA4	Subunit of SEACAT, a subcomplex of the SEA complex; Sea4p, along with Rtc1p and Mtc5p, redundantly inhibit the TORC1 inhibitory role of the Iml1p/SEACIT (Iml1p-Npr2p-Npr3p) subcomplex, a GAP for GTPase Gtr1p (EGOC subunit) in response to amino acid limitation, thereby resulting in activation of TORC1 signaling; SEA is a coatomer-related complex that associates dynamically with the vacuole; contai…	1.04462	0.93464	0.971389	1.0111	0.976341	1.01473	1.05621	0.673932	0.497674	0.765853	0.947576	0.857344	0.913906	0.580359	no
YBL105C	PKC1	Protein serine/threonine kinase; essential for cell wall remodeling during growth; localized to sites of polarized growth and the mother-daughter bud neck; homolog of the alpha, beta, and gamma isoforms of mammalian protein kinase C (PKC)	1.07007	1.00088	0.889417	1.0228	1.07101	0.951737	1.09447	0.450828	0.995856	0.115373	0.879091	0.477441	0.634187	0.275488	no
YBL106C	SRO77	Protein with roles in exocytosis and cation homeostasis; functions in docking and fusion of post-Golgi vesicles with plasma membrane; regulates cell proliferation and colony development via the Rho1-Tor1 pathway; interacts with SNARE protein Sec9p; homolog of Drosophila lethal giant larvae tumor suppressor; SRO77 has a paralog, SRO7, that arose from the whole genome duplication	0.939937	1.08717	1.41017	0.978629	1.02188	1.32547	0.91985	0.645826	0.525083	0.000105532	0.92093	0.908187	0.00557915	0.508293	no
YBL107C	MIX23	Mitochondrial intermembrane space protein of unknown function; imported via the MIA import machinery; contains an unusual twin cysteine motif (CX13C CX14C)	0.889828	1.02826	1.08241	0.768511	0.914973	0.963155	0.683843	0.25379	0.847216	0.433506	0.00388073	0.444059	0.78347	3.48803e-06	no
YBL107W-A	NA	Dubious open reading frame; unlikely to encode a functional protein, based on available experimental and comparative sequence data; completely overlaps the Ty2 LTR YBLWdelta2; YBL107W-A has a paralog, YER138W-A, that arose from a single-locus duplication	0.632029	1.35382	0.843577	1.30098	0.855653	0.533165	0.82226	0.281263	0.534356	0.719458	0.678039	0.784161	0.140964	0.69467	no
YBL108C-A	PAU9	Protein of unknown function; member of the seripauperin multigene family encoded mainly in subtelomeric regions; SWAT-GFP and mCherry fusion proteins localize to the endoplasmic reticulum and vacuole respectively	NA	NA	NA	NA	NA	NA	NA	NA	NA	NA	NA	NA	NA	NA	no
YBL108W	NA	Dubious open reading frame; unlikely to encode a functional protein, based on available experimental and comparative sequence data	0.658344	1.09942	3.75103	1.04707	0.723794	2.46947	0.689333	NA	NA	NA	NA	NA	NA	NA	no
YBL109W	NA	Dubious open reading frame; unlikely to encode a functional protein, based on available experimental and comparative sequence data	0.798547	1.59854	1.393	1.44487	1.27651	1.11238	1.15379	0.622819	0.22494	0.38037	0.451617	0.60747	0.845307	0.766512	no
YBL111C	NA	Helicase-like protein encoded within the telomeric Y' element; relocalizes from mitochondrion to cytoplasm upon DNA replication stress	1.07477	1.14109	0.914037	0.888913	1.22641	0.982378	0.955375	0.47223	0.13448	0.310128	0.256989	0.0146612	0.899601	0.67797	no
YBL112C	NA	Putative protein of unknown function; YBL112C is contained within TEL02L	0.965978	1.55541	1.09597	0.912033	1.50249	1.05868	0.881003	0.952219	0.250925	0.838434	0.897957	0.326177	0.924798	0.796196	no
YBL113C	NA	Helicase-like protein encoded within the telomeric Y' element	0.977889	1.18416	1.00686	0.933849	1.15798	0.984599	0.913201	0.855397	0.041524	0.954245	0.601313	0.108781	0.913675	0.340672	no
YBL113W-A	NA	Dubious open reading frame; unlikely to encode a functional protein, based on available experimental and comparative sequence data; identified by gene-trapping, microarray-based expression analysis, and genome-wide homology searching	NA	NA	NA	NA	NA	NA	NA	NA	NA	NA	NA	NA	NA	NA	no
YBR001C	NTH2	Putative neutral trehalase, required for thermotolerance; may mediate resistance to other cellular stresses; NTH2 has a paralog, NTH1, that arose from the whole genome duplication	1.05951	1.11438	0.858398	0.891203	1.18069	0.909482	0.94424	0.620539	0.284796	0.0851458	0.327798	0.0908416	0.402729	0.626097	no
YBR002C	RER2	Forms the dehydrodolichyl diphosphate syntase (DDS) complex with NUS1; major enzyme of polyprenol synthesis in both the endoplasmic reticulum (ER) and in lipid droplets; participates in ER protein sorting; human ortholog DHDDS functionally complements the heat sensitive growth defect of a ts allele, and is associated with retinitis pigmentosa	1.26573	1.06205	0.966747	1.03661	1.34427	1.22364	1.31206	0.000153768	0.475154	0.678648	0.768384	1.34537e-06	0.0032614	7.89696e-06	no
YBR003W	COQ1	Hexaprenyl pyrophosphate synthetase; catalyzes the first step in ubiquinone (coenzyme Q) biosynthesis	1.12685	0.714308	0.67491	0.876984	0.804918	0.760523	0.98823	0.257451	7.46316e-05	2.25664e-06	0.266756	0.0293465	0.0047329	0.93482	no
YBR004C	GPI18	Functional ortholog of human PIG-V; PIG-V is a mannosyltransferase that transfers the second mannose in glycosylphosphatidylinositol biosynthesis; the authentic, non-tagged protein was localized to mitochondria	1.02194	0.979493	1.33872	0.932321	1.00099	1.3681	0.952781	0.905939	0.913744	0.00697506	0.733547	0.99657	0.00846018	0.768128	no
YBR005W	RCR1	Protein of the ER membrane involved in cell wall chitin deposition; may function in the endosomal-vacuolar trafficking pathway, helping determine whether plasma membrane proteins are degraded or routed to the plasma membrane; RCR1 has a paralog, RCR2, that arose from the whole genome duplication	0.691509	1.06317	1.23236	1.08533	0.735195	0.852185	0.750514	0.00419908	0.762334	0.12522	0.732761	0.0280868	0.323235	0.0315548	no
YBR006W	UGA2	Succinate semialdehyde dehydrogenase; involved in the utilization of gamma-aminobutyrate (GABA) as a nitrogen source; part of the 4-aminobutyrate and glutamate degradation pathways; localized to the cytoplasm	0.96659	0.87589	1.20342	1.18833	0.846626	1.16322	1.14862	0.872126	0.4515	0.192808	0.347926	0.339356	0.374825	0.392435	Gcn4
YBR007C	DSF2	Deletion suppressor of mpt5 mutation; relocalizes from bud neck to cytoplasm upon DNA replication stress	1.10553	0.923791	0.891231	1.56855	1.02128	0.985287	1.73408	0.377053	0.520658	0.254363	9.8472e-08	0.905001	0.930985	9.16054e-12	no
YBR008C	FLR1	Plasma membrane transporter of the major facilitator superfamily; member of the 12-spanner drug:H(+) antiporter DHA1 family; involved in efflux of fluconazole, diazaborine, benomyl, methotrexate, and other drugs; expression induced in cells treated with the mycotoxin patulin; relocalizes from nucleus to plasma membrane upon DNA replication stress	0.686475	1.18754	1.45818	0.992015	0.81522	1.00101	0.680994	0.0235373	0.39868	0.0172577	0.983504	0.313058	0.997912	0.0187312	no
YBR009C	HHF1	Histone H4; core histone protein required for chromatin assembly and chromosome function; one of two identical histone proteins (see also HHF2); contributes to telomeric silencing; N-terminal domain involved in maintaining genomic integrity	0.932633	1.32885	1.15715	1.03321	1.23933	1.07919	0.963606	0.572187	0.00160779	0.137697	0.865202	0.0339787	0.55427	0.784165	no
YBR010W	HHT1	Histone H3; core histone protein required for chromatin assembly, part of heterochromatin-mediated telomeric and HM silencing; one of two identical histone H3 proteins (see HHT2); regulated by acetylation, methylation, and phosphorylation; H3K14 acetylation plays an important role in the unfolding of strongly positioned nucleosomes during repair of UV damage	0.978643	1.22108	0.992303	0.999721	1.19501	0.971111	0.97837	0.805945	0.00034333	0.927227	0.998376	0.00288132	0.747383	0.800639	no
YBR011C	IPP1	Cytoplasmic inorganic pyrophosphatase (PPase); homodimer that catalyzes the rapid exchange of oxygens from Pi with water, highly expressed and essential for viability, active-site residues show identity to those from E, coli PPase	0.94319	0.839471	1.08921	1.23666	0.79178	1.02734	1.1664	0.371957	0.000593153	0.126018	3.79152e-05	3.29937e-06	0.742357	0.00305207	no
YBR012C	NA	Dubious open reading frame; unlikely to encode a functional protein, based on available experimental and comparative sequence data; expression induced by iron-regulated transcriptional activator Aft2p	NA	NA	NA	NA	NA	NA	NA	NA	NA	NA	NA	NA	NA	NA	no
YBR013C	NA	Putative protein of unknown function; haploid deletion mutant exhibits synthetic phenotype with alpha-synuclein; SWAT-GFP fusion protein localizes to the endoplasmic reticulum while mCherry fusion protein localizes to both the endoplasmic reticulum and vacuole	NA	NA	NA	NA	NA	NA	NA	NA	NA	NA	NA	NA	NA	NA	Gcn4
YBR014C	GRX7	Cis-golgi localized monothiol glutaredoxin; more similar in activity to dithiol than other monothiol glutaredoxins; involved in the oxidative stress response; does not bind metal ions; GRX7 has a paralog, GRX6, that arose from the whole genome duplication	0.857147	1.19553	1.59408	1.08459	1.02474	1.36636	0.929654	0.105037	0.0508527	8.2931e-10	0.554021	0.873368	0.000270519	0.506724	no
YBR015C	MNN2	Alpha-1,2-mannosyltransferase; responsible for addition of the first alpha-1,2-linked mannose to form the branches on the mannan backbone of oligosaccharides, localizes to an early Golgi compartment	1.09428	1.02757	0.856424	1.05483	1.12445	0.937167	1.15428	0.167676	0.761229	0.00564653	0.558888	0.0739629	0.388327	0.0143546	no
YBR016W	NA	Tail-anchored plasma membrane protein with a conserved CYSTM module; predicted to be palmitoylated; has similarity to hydrophilins, which are involved in the adaptive response to hyperosmotic conditions; YBR016W has a paralog, YDL012C, that arose from the whole genome duplication	0.726628	1.10892	0.855259	1.29069	0.80577	0.621455	0.937849	0.396092	0.837618	0.693071	0.612837	0.623504	0.197762	0.894174	no
YBR017C	KAP104	Transportin or cytosolic karyopherin beta 2; functions in the rg-nuclear localization signal-mediated nuclear import/reimport of mRNA-binding proteins Nab2p and Hrp1p; regulates asymmetric protein synthesis in daughter cells during mitosis	1.06833	1.01563	0.956874	1.09337	1.08503	1.02225	1.16808	0.562521	0.916023	0.690111	0.493278	0.486919	0.881896	0.0959331	no
YBR018C	GAL7	Galactose-1-phosphate uridyl transferase; synthesizes glucose-1-phosphate and UDP-galactose from UDP-D-glucose and alpha-D-galactose-1-phosphate in the second step of galactose catabolism; human homolog UGP2 can complement yeast null mutant	0.659412	1.40857	1.75374	0.95601	0.928828	1.15644	0.630404	0.316178	0.444599	0.113656	0.960244	0.909092	0.78149	0.256625	no
YBR019C	GAL10	UDP-glucose-4-epimerase; catalyzes interconversion of UDP-galactose and UDP-D-glucose in galactose metabolism; also catalyzes conversion of alpha-D-glucose or alpha-D-galactose to their beta-anomers; human homolog GALE implicated in galactosemia, can complement yeast null mutant	0.872701	1.49827	1.36772	1.11801	1.30754	1.19361	0.975685	0.520725	0.0114261	0.0530818	0.702011	0.156488	0.391323	0.924699	no
YBR020W	GAL1	Galactokinase; phosphorylates alpha-D-galactose to alpha-D-galactose-1-phosphate in the first step of galactose catabolism; expression regulated by Gal4p; human homolog GALK2 complements yeast null mutant; GAL1 has a paralog, GAL3, that arose from the whole genome duplication	1.12786	1.15727	1.24903	0.911776	1.30524	1.40873	1.02835	0.533966	0.425245	0.135237	0.733142	0.12495	0.0348042	0.907976	no
YBR021W	FUR4	Plasma membrane localized uracil permease; expression is tightly regulated by uracil levels and environmental cues; conformational alterations induced by unfolding or substrate binding result in Rsp5p-mediated ubiquitination and degradation	1.58757	0.690818	0.943401	1.32625	1.09672	1.49771	2.10551	8.03813e-07	8.474e-05	0.635663	0.00487839	0.519826	7.02503e-05	2.68618e-17	no
YBR022W	POA1	Phosphatase that is highly specific for ADP-ribose 1''-phosphate; a tRNA splicing metabolite; may have a role in regulation of tRNA splicing	0.951627	0.948432	0.992217	0.897264	0.902553	0.94422	0.85386	0.783363	0.786305	0.965262	0.588925	0.552614	0.76718	0.270802	no
YBR023C	CHS3	Chitin synthase III; catalyzes the transfer of N-acetylglucosamine (GlcNAc) to chitin; required for synthesis of the majority of cell wall chitin, the chitin ring during bud emergence, and spore wall chitosan; contains overlapping di-leucine and di-acidic signals that mediate, respectively, intracellular trafficking by AP-1 and trafficking to plasma membrane by exomer complex; requires AP-3 compl…	0.994625	0.960425	0.997709	0.909201	0.955263	0.992346	0.904314	0.965808	0.699795	0.981616	0.321475	0.654604	0.955236	0.208439	no
YBR024W	SCO2	Protein anchored to mitochondrial inner membrane; may have a redundant function with Sco1p in delivery of copper to cytochrome c oxidase; interacts with Cox2p; SCO2 has a paralog, SCO1, that arose from the whole genome duplication	1.05366	0.568938	0.738393	0.962746	0.599468	0.778016	1.01441	0.777227	2.92567e-06	0.016025	0.88673	7.08962e-05	0.0915587	0.944547	no
YBR025C	OLA1	P-loop ATPase with similarity to human OLA1 and bacterial YchF; identified as specifically interacting with the proteasome; null mutant displays increased translation rate and increased readthrough of premature stop codons; protein abundance increases in response to hydrogen peroxide and to DNA replication stress	0.916563	0.942237	1.07225	1.06052	0.86362	0.982785	0.972031	0.214642	0.453763	0.306594	0.536889	0.0256685	0.864326	0.745275	no
YBR026C	ETR1	2-enoyl thioester reductase; member of the medium chain dehydrogenase/reductase family; localized to mitochondria, where it has a probable role in fatty acid synthesis; human MECR functionally complements the respiratory growth defect of the null mutant	0.8272	0.925849	1.06056	0.953292	0.765863	0.877298	0.788564	0.037294	0.514646	0.580941	0.775363	0.00299634	0.215069	0.00646569	no
YBR027C	NA	Putative protein of unknown function; conserved among S, cerevisiae strains; YBR027C is not an essential gene	0.317061	0.594104	1.53919	2.29026	0.188368	0.488018	0.726154	NA	NA	NA	NA	NA	NA	NA	Gcn4
YBR028C	YPK3	AGC kinase; phosphorylated by cAMP-dependent protein kinase (PKA) in a TORC1-dependent manner; directly phosphorylated by TORC1; phosphorylates ribosomal protein Rps6a/b (S6), in a TORC-dependent manner; undergoes autophosphorylation	1.8965	0.667817	0.627663	1.33325	1.26652	1.19036	2.52851	3.76701e-20	9.07944e-09	2.69138e-11	0.000108608	0.00484336	0.0569132	6.93932e-43	Gcn4
YBR029C	CDS1	Phosphatidate cytidylyltransferase (CDP-diglyceride synthetase); an enzyme that catalyzes that conversion of CTP + phosphate into diphosphate + CDP-diaclglyerol, a critical step in the synthesis of all major yeast phospholipids; human homolog CDS1 can complement yeast cds1 null mutant	0.956133	0.853954	1.24575	0.958188	0.816494	1.1911	0.916155	0.581679	0.0108873	9.73542e-05	0.694776	0.00111692	0.0065948	0.209723	no
YBR030W	RKM3	Ribosomal lysine methyltransferase; specific for monomethylation of Rpl42ap and Rpl42bp (lysine 40); nuclear SET domain containing protein; relocalizes to the cytosol in response to hypoxia	1.08388	0.979877	1.067	0.99641	1.06207	1.1565	1.07999	0.44281	0.88339	0.509915	0.984895	0.620228	0.138262	0.458973	no
YBR031W	RPL4A	Ribosomal 60S subunit protein L4A; N-terminally acetylated; homologous to mammalian ribosomal protein L4 and bacterial L4; RPL4A has a paralog, RPL4B, that arose from the whole genome duplication	1.02434	1.08119	1.08689	1.06565	1.1075	1.11334	1.09158	0.805945	0.333062	0.247626	0.533238	0.192631	0.167795	0.241677	no
YBR032W	NA	Putative protein of unknown function; conserved among S, cerevisiae strains; YBR032W is not an essential gene	1.42653	0.863678	1.16079	0.982313	1.23206	1.6559	1.4013	0.479316	0.81508	0.761933	0.984494	0.733225	0.306007	0.503071	no
YBR033W	EDS1	Putative zinc cluster protein, predicted to be a transcription factor; not an essential gene; EDS1 has a paralog, RGT1, that arose from the whole genome duplication	1.17513	0.870106	1.07647	0.952589	1.02249	1.26499	1.11942	0.263175	0.357044	0.615103	0.841597	0.929137	0.0959289	0.466107	Gcn4
YBR034C	HMT1	Nuclear SAM-dependent mono- and asymmetric methyltransferase; modifies hnRNPs, including Npl3p and Hrp1p, affecting their activity and nuclear export; methylates U1 snRNP protein Snp1p, ribosomal protein Rps2p, and histones H3 and H4; interacts genetically with genes encoding components of Rpd3(L) and this interaction is important for Rpd3 recruitment to the subtelomeric region	1.23632	0.883686	0.886674	0.978413	1.09252	1.09621	1.20963	0.0100414	0.187041	0.165568	0.901403	0.406164	0.377982	0.0217947	no
YBR035C	PDX3	Pyridoxine (pyridoxamine) phosphate oxidase; has homologs in E, coli and Myxococcus xanthus; transcription is under the general control of nitrogen metabolism	1.67066	0.452188	0.613797	1.62225	0.755454	1.02545	2.71024	1.67588e-11	1.23017e-26	1.34686e-10	6.1092e-10	0.00131748	0.859748	2.18646e-43	Gcn4
YBR036C	CSG2	Endoplasmic reticulum membrane protein; required for mannosylation of inositolphosphorylceramide and for growth at high calcium concentrations; protein abundance increases in response to DNA replication stress	1.03789	0.897827	0.889088	1.02211	0.931848	0.922777	1.06084	0.604529	0.0575824	0.0262165	0.839953	0.293232	0.216361	0.352711	no
YBR037C	SCO1	Copper-binding protein of mitochondrial inner membrane; required for cytochrome c oxidase activity and respiration; may function to deliver copper to cytochrome c oxidase; similar to thioredoxins; SCO1 has a paralog, SCO2, that arose from the whole genome duplication	1.22198	0.666476	0.81717	0.633639	0.814421	0.998567	0.774295	0.158241	0.000922503	0.127768	0.000328056	0.183345	0.996128	0.0612592	no
YBR038W	CHS2	Chitin synthase II; catalyzes transfer of N-acetylglucosamine (GlcNAc) to chitin upon activation of zymogenic form; required for chitin synthesis in the primary septum during cytokinesis; localization regulated by Cdk1p during mitosis; phosphorylation by Dbf2p kinase regulates its dynamics and chitin synthesis during cytokinesis	0.937166	0.879917	0.906764	0.878747	0.824628	0.849788	0.823531	0.491842	0.121215	0.224245	0.151856	0.0141874	0.0491817	0.00882303	no
YBR039W	ATP3	Gamma subunit of the F1 sector of mitochondrial F1F0 ATP synthase; F1F0 ATP synthase is a large, evolutionarily conserved enzyme complex required for ATP synthesis	0.963497	1.30239	1.11521	0.893184	1.25485	1.0745	0.860581	0.848576	0.045457	0.459693	0.575908	0.11634	0.701708	0.306177	no
YBR040W	FIG1	Integral membrane protein required for efficient mating; may participate in or regulate the low affinity Ca2+ influx system, which affects intracellular signaling and cell-cell fusion during mating	0.33085	1.59467	5.55087	1.67226	0.527596	1.83651	0.553269	0.247226	0.723519	0.0287344	0.748525	NA	0.510705	0.552231	no
YBR041W	FAT1	Very long chain fatty acyl-CoA synthetase and fatty acid transporter; activates imported fatty acids with a preference for very long lengths (C20-C26); has a separate function in the transport of long chain fatty acids	0.847161	1.15377	1.29669	0.971879	0.977431	1.0985	0.823338	0.0140775	0.0396043	1.8403e-05	0.834301	0.840639	0.243913	0.00312991	no
YBR042C	CST26	Acyltransferase; enzyme mainly responsible for the introduction of saturated very long chain fatty acids into neo-synthesized molecules of phosphatidylinositol; required for incorporation of stearic acid into phosphatidylinositol; affects chromosome stability when overexpressed; CST26 has a paralog, YDR018C, that arose from the whole genome duplication	0.832312	1.27262	1.35618	0.931378	1.05922	1.12877	0.775197	0.00688266	0.000139334	5.4696e-07	0.495959	0.538881	0.118918	8.84436e-05	no
YBR043C	QDR3	Multidrug transporter of the major facilitator superfamily; member of the 12-spanner drug:H(+) antiporter DHA1 family; has a role in polyamine homeostasis; involved in spore wall asembly; sequence similarity to DTR1 and QDR1, and the triple mutant dtr1 qdr1 qdr3 exhibits reduced dityrosine fluorescence relative to the single mutants; expression is upregulated under polyamine stress; required for …	2.06051	0.520254	0.638432	1.27436	1.07199	1.31549	2.62584	4.56497e-22	1.75087e-18	3.5312e-09	0.00462582	0.577989	0.00248898	6.7228e-40	Gcn4
YBR044C	TCM62	Protein involved in assembly of the succinate dehydrogenase complex; mitochondrial; putative chaperone	1.32748	0.704947	0.603505	0.914562	0.935807	0.801144	1.21407	0.00619986	0.000381325	9.20252e-08	0.590867	0.668687	0.0660497	0.0825252	no
YBR045C	GIP1	Meiosis-specific regulatory subunit of the Glc7p protein phosphatase; regulates spore wall formation and septin organization, required for expression of some late meiotic genes and for normal localization of Glc7p	0.835797	1.38039	1.53559	1.0244	1.15373	1.28344	0.856191	0.341325	0.0449949	0.00286092	0.9452	0.493544	0.163864	0.419791	Gcn4
YBR046C	ZTA1	NADPH-dependent quinone reductase; GFP-tagged protein localizes to the cytoplasm and nucleus; has similarity to E, coli quinone oxidoreductase and to human zeta-crystallin	2.27383	0.411243	0.393036	1.26427	0.935095	0.893697	2.87473	1.00122e-07	4.17164e-09	6.74798e-10	0.281582	0.812516	0.656458	1.10937e-12	Gcn4
YBR047W	FMP23	Putative protein of unknown function; proposed to be involved in iron or copper homeostasis; the authentic, non-tagged protein is detected in highly purified mitochondria in high-throughput studies	4.20125	0.169492	0.273399	1.83492	0.712079	1.14862	7.70896	3.96938e-16	1.59443e-23	1.36281e-13	0.00147909	0.183811	0.646337	3.62467e-33	no
YBR048W	RPS11B	Protein component of the small (40S) ribosomal subunit; homologous to mammalian ribosomal protein S11 and bacterial S17; RPS11B has a paralog, RPS11A, that arose from the whole genome duplication	0.907762	1.04522	0.87155	1.12388	0.948807	0.79116	1.02021	0.441997	0.776861	0.202247	0.416319	0.727261	0.0327282	0.89898	no
YBR049C	REB1	RNA polymerase I enhancer binding protein; DNA binding protein that binds to genes transcribed by both RNA polymerase I and RNA polymerase II; required for termination of RNA polymerase I transcription; Reb1p bound to DNA acts to block RNA polymerase II readthrough transcription	0.976198	1.09508	0.939804	1.00166	1.06902	0.917435	0.977816	0.856209	0.405262	0.554061	0.992544	0.589664	0.449834	0.868055	no
YBR050C	REG2	Regulatory subunit of the Glc7p type-1 protein phosphatase; involved with Reg1p, Glc7p, and Snf1p in regulation of glucose-repressible genes, also involved in glucose-induced proteolysis of maltose permease; REG2 has a paralog, REG1, that arose from the whole genome duplication	0.980899	1.54992	0.846704	0.612849	1.52031	0.830531	0.601143	0.964132	0.0772954	0.579443	0.113745	0.126163	0.603854	0.0730417	no
YBR051W	NA	Dubious open reading frame; unlikely to encode a functional protein, based on available experimental and comparative sequence data; partially overlaps the REG2/YBR050C regulatory subunit of the Glc7p type-1 protein phosphatase	0.187701	7.26223	1.77843	2.71416	1.36313	0.333814	0.509451	NA	0.205025	0.766492	NA	NA	0.523757	0.687408	no
YBR052C	RFS1	Protein of unknown function; member of a flavodoxin-like fold protein family that includes Pst2p and Ycp4p; green fluorescent protein (GFP)-fusion protein localizes to the cytoplasm in a punctate pattern; RFS1 has a paralog, PST2, that arose from the whole genome duplication	0.898488	0.955669	0.759543	1.05137	0.858657	0.68244	0.944644	0.544762	0.839163	0.0467681	0.858858	0.387874	0.0088427	0.77134	no
YBR053C	NA	Putative protein of unknown function; induced by cell wall perturbation	0.593418	0.925738	1.38968	0.952207	0.549349	0.824658	0.565056	0.00939239	0.814064	0.115183	0.911701	0.00340635	0.458329	0.00364418	no
YBR054W	YRO2	Protein with a putative role in response to acid stress; null mutant is sensitive to acetic acid; transcription is regulated by Haa1p and induced in the presence of acetic acid; protein observed in plasma membrane foci in the presence of acetic acid; the authentic, non-tagged protein is detected in a phosphorylated state in highly purified mitochondria in high-throughput studies	0.387664	0.979966	0.988523	0.802577	0.379898	0.383215	0.31113	1.96073e-10	0.947195	0.963502	0.36313	9.35017e-11	3.92645e-10	2.86795e-15	no
YBR055C	PRP6	Splicing factor; component of the U4/U6-U5 snRNP complex	1.09036	1.07179	1.13971	0.967543	1.16864	1.2427	1.05497	0.452757	0.579204	0.17603	0.861271	0.14834	0.0301764	0.672469	no
YBR056C-B	NA	Dubious open reading frame; unlikely to encode a functional protein, based on available experimental and comparative sequence data; almost completely overlaps the dubious ORF YBR056W-A	NA	NA	NA	NA	NA	NA	NA	NA	NA	NA	NA	NA	NA	NA	no
YBR056W	NA	Putative glycoside hydrolase of the mitochondrial intermembrane space	0.549832	1.31083	1.28239	1.0409	0.720736	0.705102	0.572321	6.0116e-05	0.12857	0.138761	0.908549	0.0605494	0.0443619	0.000203899	no
YBR056W-A	NA	Protein of unknown function; mRNA identified as translated by ribosome profiling data; partially overlaps dubious ORF YBR056C-B; YBR056W-A has a paralog, YDR034W-B, that arose from the whole genome duplication	0.488148	0.554735	1.36709	0.877844	0.270793	0.667345	0.428518	0.373845	0.564579	0.717015	0.933635	NA	0.669782	0.279623	no
YBR057C	MUM2	Protein essential for meiotic DNA replication and sporulation; cytoplasmic protein; subunit of the MIS complex which controls mRNA methylation during during the induction of sporulation; also interacts with Orc2p, which is a component of the origin recognition complex	0.989692	1.06573	1.06286	1.02121	1.05474	1.0519	1.01069	0.937305	0.555863	0.517542	0.902621	0.645511	0.66566	0.933531	no
YBR058C	UBP14	Ubiquitin-specific protease; specifically disassembles unanchored ubiquitin chains; involved in fructose-1,6-bisphosphatase (Fbp1p) degradation; similar to human isopeptidase T	1.01205	1.01814	0.982962	0.990504	1.03041	0.994808	1.00244	0.936445	0.907216	0.889437	0.965978	0.844602	0.976895	0.985851	no
YBR058C-A	TSC3	Protein that stimulates the activity of serine palmitoyltransferase; involved in sphingolipid biosynthesis; Lcb1p and Lcb2p are the two components of serine palmitoyltransferase	0.847533	1.03414	1.23572	1.29768	0.876471	1.04731	1.09983	0.515773	0.91871	0.33919	0.33366	0.642957	0.891596	0.731753	no
YBR059C	AKL1	Ser-Thr protein kinase; member (with Ark1p and Prk1p) of the Ark kinase family; involved in endocytosis and actin cytoskeleton organization	0.989292	0.831175	0.835824	0.902554	0.822275	0.826874	0.89289	0.942026	0.046616	0.0427138	0.416542	0.0445234	0.0551131	0.26605	no
YBR060C	ORC2	Subunit of the origin recognition complex (ORC); ORC directs DNA replication by binding to replication origins and is also involved in transcriptional silencing; interacts with Spp1p and with trimethylated histone H3; phosphorylated by Cdc28p	1.13084	1.02033	0.876457	0.976907	1.15382	0.991129	1.10472	0.153799	0.872002	0.0957953	0.883709	0.108721	0.953875	0.267108	no
YBR061C	TRM7	2'-O-ribose methyltransferase; methylates the 2'-O-ribose of tRNA-Phe, tRNA-Trp, and tRNA-Leu at positions C32 and N34 of tRNA anticodon loop; crucial biological role likely modification of tRNA-Phe; interacts with Trm732p and Rtt10p in 2'-O-methylation of C32 and N34 substrate tRNAs, respectively; yeast null mutant can be functionally complemented by human FTSJ1, mutations in which have been imp…	1.01915	1.06201	1.1481	1.03248	1.08235	1.17009	1.05226	0.901076	0.660829	0.167481	0.869175	0.546626	0.160003	0.698864	no
YBR062C	NA	Protein of unknown function that interacts with Msb2p; may play a role in activation of the filamentous growth pathway	0.65559	1.22403	1.40729	0.974259	0.802464	0.922606	0.638714	2.08354e-07	0.0292333	3.08651e-05	0.892829	0.0194769	0.487826	3.43232e-08	no
YBR063C	NA	Putative protein of unknown function; YBR063C is not an essential gene	1.03837	1.08527	1.25821	1.16741	1.12692	1.3065	1.21221	0.806707	0.554896	0.0190342	0.230939	0.374623	0.0152845	0.0811422	no
YBR064W	NA	Dubious open reading frame; unlikely to encode a functional protein, based on available experimental and comparative sequence data; partially overlaps the uncharacterized ORF YBR063C	0.716528	1.07206	0.791529	1.33772	0.768158	0.567152	0.958512	NA	0.966697	0.856836	NA	NA	0.68106	0.975456	no
YBR065C	ECM2	Pre-mRNA splicing factor; facilitates the cooperative formation of U2/U6 helix II in association with stem II in the spliceosome, function may be regulated by Slu7p	1.09512	1.06121	1.07353	1.13595	1.16215	1.17565	1.244	0.537212	0.725861	0.605221	0.428996	0.29061	0.244575	0.0695208	no
YBR066C	NRG2	Transcriptional repressor; mediates glucose repression and negatively regulates filamentous growth; activated in stochastic pulses of nuclear localization in response to low glucose	0.802588	1.07241	1.08782	1.22448	0.860704	0.873071	0.982755	0.15314	0.739989	0.623632	0.261698	0.40447	0.451495	0.936019	no
YBR067C	TIP1	Major cell wall mannoprotein with possible lipase activity; transcription is induced by heat- and cold-shock; member of the Srp1p/Tip1p family of serine-alanine-rich proteins	0.492754	1.68595	2.35613	0.971422	0.830758	1.16099	0.478672	7.50649e-10	8.91275e-06	3.36712e-14	0.918324	0.230197	0.350527	9.31028e-11	no
YBR068C	BAP2	High-affinity leucine permease; functions as a branched-chain amino acid permease involved in uptake of leucine, isoleucine and valine; contains 12 predicted transmembrane domains; BAP2 has a paralog, BAP3, that arose from the whole genome duplication	1.79821	0.57659	0.283839	0.983678	1.03683	0.510403	1.76886	3.23731e-14	8.39524e-13	3.58833e-64	0.931851	0.7976	1.02429e-17	1.04397e-13	Gcn4
YBR069C	TAT1	Amino acid transporter for valine, leucine, isoleucine, and tyrosine; low-affinity tryptophan and histidine transporter; overexpression confers FK506 and FTY720 resistance; protein abundance increases in response to DNA replication stress	1.09245	1.06999	0.924406	1.0136	1.16891	1.00987	1.10731	0.318143	0.484486	0.343386	0.934492	0.055912	0.943502	0.224115	no
YBR070C	ALG14	Component of UDP-GlcNAc transferase; required for second step of dolichyl-linked oligosaccharide synthesis; anchors catalytic subunit Alg13p to ER membrane; similar to bacterial and human glycosyltransferases; both human homologs ALG13 and ALG14 are required to complement yeast alg14 mutant	0.966346	1.01379	1.10246	1.02955	0.979673	1.06536	0.994901	0.82182	0.936896	0.39436	0.891728	0.918185	0.671449	0.974338	no
YBR071W	NA	Protein of unknown function found in the cytoplasm and bud neck; mRNA expression may be regulated by the cell cycle and/or cell wall stress; overexpression of YBR071W affects endocytic protein trafficking	0.586153	0.952978	1.78675	0.814817	0.558591	1.04731	0.477608	3.13804e-06	0.811981	2.12719e-07	0.19369	4.09656e-07	0.813165	2.71084e-11	no
YBR072C-A	NA	Putative protein of unknown function; identified by fungal homology and RT-PCR	0.913486	0.542518	1.81847	0.849465	0.495582	1.66115	0.775974	NA	0.74401	0.658146	NA	NA	0.766535	0.890771	no
YBR072W	HSP26	Small heat shock protein (sHSP) with chaperone activity; forms hollow, sphere-shaped oligomers that suppress unfolded proteins aggregation; long-lived protein that is preferentially retained in mother cells and forms cytoplasmic foci; oligomer activation requires heat-induced conformational change; also has mRNA binding activity	2.59927	1.17866	0.243756	0.218516	3.06365	0.633587	0.567983	0.236722	0.888247	0.0441047	0.05162	0.172701	0.653043	0.518969	no
YBR073W	RDH54	DNA-dependent ATPase; DNA recombination/repair translocase, supercoils DNA and promotes DNA strand opening; stimulates strand exchange by modifying dsDNA topology; involved in recombinational repair of DNA double-strand breaks (DSBs) during mitosis and meiosis; phosphorylated in Mec1p-, Rad53p-dependent way in response to one DSB; contributes to remodelling of nucleosomes; proposed to be involved…	0.892506	1.09428	1.03659	0.919826	0.976649	0.925164	0.82095	0.195582	0.34255	0.71783	0.469721	0.860196	0.443317	0.0111687	no
YBR074W	PFF1	Multi-spanning vacuolar membrane protease; glycosylated transmembrane protein bearing homology to the M28 family of metalloproteases; has a lumenal-facing protease domain; proposed role in vacuole physiology	1.27573	0.942526	0.955263	1.09328	1.20241	1.21866	1.39473	0.012694	0.671244	0.709755	0.551807	0.0947829	0.0708287	0.00026952	no
YBR076C-A	NA	Dubious open reading frame; unlikely to encode a functional protein, based on available experimental and comparative sequence data; partially overlaps verified gene ECM8; identified by fungal homology and RT-PCR	0.76492	0.996402	2.36737	1.46899	0.762168	1.81085	1.12366	0.425542	0.995854	0.000595226	0.280298	0.448651	0.0434446	0.762567	no
YBR076W	ECM8	Non-essential protein of unknown function	0.898889	1.06518	4.84715	0.660709	0.957481	4.35705	0.593904	0.755235	0.871605	9.69413e-17	0.186806	0.926532	9.87332e-14	0.0502321	no
YBR077C	SLM4	Component of the EGO and GSE complexes; essential for integrity and function of EGO; EGO is involved in the regulation of microautophagy and GSE is required for proper sorting of amino acid permease Gap1p; gene exhibits synthetic genetic interaction with MSS4	0.927353	1.01912	1.53889	1.28353	0.945082	1.42709	1.19028	0.65552	0.926781	0.000130053	0.073606	0.770609	0.00539869	0.207543	no
YBR078W	ECM33	GPI-anchored protein of unknown function; possible role in apical bud growth; GPI-anchoring on the plasma membrane crucial to function; phosphorylated in mitochondria; similar to Sps2p; ECM33 has a paralog, PST1, that arose from the whole genome duplication	0.89741	1.27368	1.05737	0.956399	1.14301	0.948892	0.858282	0.0557683	5.34867e-07	0.35253	0.612778	0.0176664	0.451495	0.00328029	no
YBR079C	RPG1	eIF3a subunit of the eukaryotic translation initiation factor 3 (eIF3); subunit of the core complex of eIF3; essential for translation; part of a Prt1p-Rpg1p-Nip1p subcomplex that stimulates binding of mRNA and tRNA(i)Met to ribosomes; involved in translation reinitiation; eIF3 is also involved in programmed stop codon readthrough	1.11349	0.73608	0.954109	0.985077	0.819614	1.06239	1.09687	0.390098	0.00179667	0.719458	0.947356	0.0822602	0.686336	0.459442	no
YBR080C	SEC18	AAA ATPase and SNARE disassembly chaperone; required for vesicular transport between ER and Golgi, the 'priming' step in homotypic vacuole fusion, autophagy, and protein secretion; releases Sec17p from SNAP complexes; has similarity to mammalian N-ethylmaleimide-sensitive factor (NSF)	1.01671	0.913847	0.788075	1.02665	0.929119	0.801245	1.04381	0.869889	0.236054	8.62071e-05	0.839982	0.387222	0.00106105	0.621029	no
YBR081C	SPT7	Subunit of the SAGA transcriptional regulatory complex; involved in proper assembly of the complex; also present as a C-terminally truncated form in the SLIK/SALSA transcriptional regulatory complex	1.10757	0.836947	0.831973	1.34105	0.926981	0.921472	1.48532	0.392556	0.0928971	0.0626611	0.00255453	0.588358	0.542779	9.21724e-06	no
YBR082C	UBC4	Ubiquitin-conjugating enzyme (E2); key E2 partner with Ubc1p for the anaphase-promoting complex (APC); mediates degradation of abnormal or excess proteins, including calmodulin and histone H3; regulates levels of DNA Polymerase-{alpha} to promote efficient and accurate DNA replication; interacts with many SCF ubiquitin protein ligases; component of the cellular stress response; UBC4 has a paralog…	0.832502	1.07576	1.00416	1.19223	0.895572	0.835962	0.992533	0.105791	0.614933	0.977385	0.165653	0.413053	0.139357	0.964333	no
YBR083W	TEC1	Transcription factor targeting filamentation genes and Ty1 expression; Ste12p activation of most filamentation gene promoters depends on Tec1p and Tec1p transcriptional activity is dependent on its association with Ste12p; binds to TCS elements upstream of filamentation genes, which are regulated by Tec1p/Ste12p/Dig1p complex; competes with Dig2p for binding to Ste12p/Dig1p; positive regulator of…	0.650799	0.821174	1.4902	0.953197	0.53442	0.96982	0.62034	2.78021e-07	0.0461341	1.54713e-06	0.787499	2.04198e-14	0.833438	7.74029e-09	no
YBR084C-A	RPL19A	Ribosomal 60S subunit protein L19A; rpl19a and rpl19b single null mutations result in slow growth, while the double null mutation is lethal; homologous to mammalian ribosomal protein L19, no bacterial homolog; RPL19A has a paralog, RPL19B, that arose from the whole genome duplication	1.00316	0.975792	0.901363	1.04935	0.97888	0.904215	1.05267	0.975837	0.806004	0.111386	0.650827	0.841117	0.174814	0.513125	no
YBR084W	MIS1	Mitochondrial C1-tetrahydrofolate synthase; involved in interconversion between different oxidation states of tetrahydrofolate (THF); provides activities of formyl-THF synthetase, methenyl-THF cyclohydrolase, and methylene-THF dehydrogenase	1.09234	1.06351	1.01218	1.07993	1.16172	1.10564	1.17965	0.404453	0.605753	0.920548	0.575562	0.131138	0.353925	0.0680198	no
YBR085C-A	NA	Protein of unknown function; green fluorescent protein (GFP)-fusion protein localizes to the cytoplasm and to the nucleus; protein abundance increases in response to DNA replication stress	0.692122	1.10741	1.63286	1.26687	0.766465	1.13014	0.876829	0.0919357	0.738731	0.0125159	0.411343	0.285287	0.678231	0.62255	no
YBR085W	AAC3	Mitochondrial inner membrane ADP/ATP translocator; exchanges cytosolic ADP for mitochondrially synthesized ATP; expressed under anaerobic conditions; similar to Aac1p; has roles in maintenance of viability and in respiration; AAC3 has a paralog, PET9, that arose from the whole genome duplication	1.31757	0.827929	1.20886	0.891383	1.09086	1.59275	1.17446	0.121554	0.336936	0.272853	0.681723	0.725456	0.00596419	0.418417	no
YBR086C	IST2	Cortical ER protein involved in ER-plasma membrane tethering; one of 6 proteins (Ist2p, Scs2p, Scs22p, Tcb1p, Tcb2p, Tcb3p) that connect ER to the plasma membrane (PM) and regulate PM phosphatidylinositol-4-phosphate (PI4P) levels by controlling access of Sac1p phosphatase to its substrate PI4P in the PM; localizes to the mother cell in small-budded cells and to the bud in medium- and large-budde…	1.00306	1.04798	0.94926	0.928748	1.05119	0.952168	0.931594	0.973449	0.481297	0.363712	0.271397	0.46483	0.467508	0.225031	no
YBR087W	RFC5	Subunit of heteropentameric Replication factor C (RF-C); RF-C is a DNA binding protein and ATPase that acts as a clamp loader of the proliferating cell nuclear antigen (PCNA) processivity factor for DNA polymerases delta and epsilon	0.92392	1.07091	1.12692	0.964659	0.989437	1.04118	0.891268	0.342588	0.436738	0.0896602	0.785626	0.938563	0.692259	0.132725	no
YBR088C	POL30	Proliferating cell nuclear antigen (PCNA); functions as the sliding replication clamp for DNA polymerase delta; may function as a docking site for other proteins required for mitotic and meiotic chromosomal DNA replication and for DNA repair; PCNA ubiquitination at K164 plays a crucial role during Okazaki fragment processing	0.828086	1.06843	1.17723	0.666852	0.884748	0.974844	0.552211	0.633358	0.894094	0.652675	0.326629	0.794913	0.963455	0.0626584	no
YBR089C-A	NHP6B	High-mobility group (HMG) protein; binds to and remodels nucleosomes; involved in recruiting FACT and other chromatin remodelling complexes to the chromosomes; functionally redundant with Nhp6Ap; required for transcriptional initiation fidelity of some tRNA genes; homologous to mammalian HMGB1 and HMGB2; NHP6B has a paralog, NHP6A, that arose from the whole genome duplication	0.908438	1.04846	0.828826	1.11933	0.952457	0.752937	1.01684	0.886917	0.949732	0.729353	0.901472	0.954599	0.64271	0.979416	no
YBR089W	NA	Dubious open reading frame; unlikely to encode a functional protein, based on available experimental and comparative sequence data; almost completely overlaps the verified gene POL30	NA	NA	NA	NA	NA	NA	NA	NA	NA	NA	NA	NA	NA	NA	no
YBR090C	NA	Putative protein of unknown function; green fluorescent protein (GFP)-fusion protein localizes to the cytoplasm and nucleus	0.521571	1.98679	2.04135	1.5354	1.03625	1.06471	0.80082	0.338271	0.313701	0.243341	0.657491	0.976764	0.953737	0.78302	no
YBR091C	TIM12	Essential protein of the inner mitochondrial membrane; peripherally localized; component of the TIM22 complex, which is a twin-pore translocase that mediates insertion of numerous multispanning inner membrane proteins	0.930985	0.972575	1.06659	0.865362	0.905452	0.992978	0.805639	0.656225	0.888247	0.659856	0.385496	0.543239	0.976529	0.0883086	no
YBR092C	PHO3	Constitutively expressed acid phosphatase similar to Pho5p; brought to the cell surface by transport vesicles; hydrolyzes thiamin phosphates in the periplasmic space, increasing cellular thiamin uptake; expression is repressed by thiamin	1.10155	1.13378	1.15381	0.759224	1.24891	1.27098	0.836321	0.522858	0.392087	0.266402	0.0319003	0.0947972	0.0697156	0.169382	no
YBR093C	PHO5	Repressible acid phosphatase; 1 of 3 repressible acid phosphatases that also mediates extracellular nucleotide-derived phosphate hydrolysis; secretory pathway derived cell surface glycoprotein; induced by phosphate starvation and coordinately regulated by PHO4 and PHO2	0.608744	2.10025	0.540241	0.436096	1.27852	0.328868	0.265471	0.225378	0.0468547	0.0950774	0.0340898	0.63031	0.00262839	6.89738e-05	no
YBR094W	PBY1	Putative tubulin tyrosine ligase associated with P-bodies; may have a role in mRNA metabolism; yeast knockout collection strain identified as a pby1 null mutant is actually wild-type for PBY1 and deleted for mms4	0.9602	1.03201	1.07024	0.909386	0.990931	1.02764	0.873192	0.714927	0.801259	0.45629	0.398534	0.954599	0.829473	0.117773	no
YBR095C	RXT2	Component of the histone deacetylase Rpd3L complex; possibly involved in cell fusion and invasive growth; relocalizes to the cytosol in response to hypoxia	1.02201	0.966887	0.973297	0.904149	0.988164	0.994715	0.924046	0.881193	0.818487	0.825658	0.450552	0.947995	0.976895	0.494331	no
YBR096W	NA	Putative protein of unknown function; green fluorescent protein (GFP)-fusion protein localizes to the ER	1.09996	0.822813	0.767698	1.25348	0.905062	0.844438	1.37878	0.506066	0.116183	0.0164284	0.0681329	0.526434	0.223218	0.00299715	no
YBR097W	VPS15	Serine/threonine protein kinase involved in vacuolar protein sorting; functions as a membrane-associated complex with Vps34p; active form recruits Vps34p to the Golgi membrane; interacts with the GDP-bound form of Gpa1p; myristoylated; a fraction is localized, with Vps34p, to nuclear pores at nucleus-vacuole junctions and may facilitate transcription elongation for genes positioned at the nuclear…	0.874331	1.11669	1.03853	1.03242	0.976356	0.908015	0.902674	0.34175	0.468904	0.810169	0.899807	0.916518	0.549486	0.485583	no
YBR098W	MMS4	Subunit of structure-specific Mms4p-Mus81p endonuclease; cleaves branched DNA; involved in recombination, DNA repair, and joint molecule formation/resolution during meiotic recombination; phosphorylation of the non-catalytic subunit Mms4p by Cdc28p and Cdc5p during mitotic cell cycle activates the function of Mms4p-Mus81p	0.985579	1.03913	0.976952	0.98036	1.02415	0.962863	0.966223	0.951519	0.865018	0.903349	0.949932	0.931027	0.872533	0.875191	no
YBR099C	NA	Dubious open reading frame; unlikely to encode a functional protein, based on available experimental and comparative sequence data; completely overlaps the verified gene MMS4	NA	NA	NA	NA	NA	NA	NA	NA	NA	NA	NA	NA	NA	NA	no
YBR101C	FES1	Hsp70 (Ssa1p) nucleotide exchange factor; required for the release of misfolded proteins from the Hsp70 system to the Ub-proteasome machinery for destruction; cytosolic homolog of Sil1p, which is the nucleotide exchange factor for BiP (Kar2p) in the endoplasmic reticulum; protein abundance increases in response to DNA replication stress	0.80477	1.16788	1.09456	0.861809	0.939874	0.880867	0.693558	0.0404774	0.178624	0.442259	0.264983	0.674465	0.312002	0.000121474	no
YBR102C	EXO84	Exocyst subunit with dual roles in exocytosis and spliceosome assembly; subunit of the the exocyst complex which mediates polarized targeting and tethering of post-Golgi secretory vesicles to active sites of exocytosis at the plasma membrane (PM) prior to SNARE-mediated fusion; required for exocyst assembly and targeting the complex to specific sites on the bud tip PM; associates the U1 snRNP; ro…	1.02001	0.938187	0.879527	1.14323	0.956959	0.897125	1.16611	0.87159	0.548063	0.115607	0.148011	0.712382	0.272487	0.0623862	no
YBR103C-A	NA	Dubious open reading frame; unlikely to encode a functional protein, based on available experimental and comparative sequence data; identified by homology to related yeast	0.450257	2.09156	1.91869	1.17306	0.94174	0.863903	0.52818	NA	NA	NA	NA	NA	NA	NA	no
YBR103W	SIF2	WD40 repeat-containing subunit of Set3C histone deacetylase complex; complex represses early/middle sporulation genes; antagonizes telomeric silencing; binds specifically to the Sir4p N-terminus	1.14059	0.924101	0.904437	1.07877	1.05402	1.03159	1.23043	0.0998779	0.385494	0.195477	0.477251	0.626694	0.791867	0.00412522	no
YBR104W	YMC2	Putative mitochondrial inner membrane transporter; proposed role in oleate metabolism and glutamate biosynthesis; member of the mitochondrial carrier (MCF) family; YMC2 has a paralog, YMC1, that arose from the whole genome duplication	1.82204	0.514102	0.685005	1.52107	0.936712	1.2481	2.77145	2.4177e-11	4.73494e-14	4.30384e-05	1.0231e-05	0.657228	0.0485557	9.1584e-33	no
YBR105C	VID24	GID Complex regulatory subunit; binds GID Complex in response to glucose through interactions with complex member Vid28p; regulates fructose-1,6-bisphosphatase (FBPase) targeting to the vacuole; promotes proteasome-dependent catabolite degradation of FBPase; peripheral membrane protein located at Vid (vacuole import and degradation) vesicles	2.5248	0.640164	0.521196	1.38346	1.61629	1.31592	3.49297	3.52009e-26	6.40808e-07	1.24119e-13	0.000851161	3.36663e-07	0.0124618	1.22129e-48	Gcn4
YBR106W	PHO88	Protein involved in SRP-independent targeting of substrates to the ER; component of an alternative ER targeting pathway that has partial functional redundancy with the GET pathway; preference for substrates with downstream transmembrane domains; interacts with Snd1p, Env10p/Snd2p, and Sec61p-translocon subunits; can compensate for loss of SRP; role in phosphate transport, interacting with pho88, …	0.820125	1.03263	1.12919	1.04999	0.846882	0.926079	0.861122	0.000489652	0.719971	0.0406192	0.619837	0.00651568	0.29455	0.0111807	no
YBR107C	IML3	Outer kinetochore protein and component of the Ctf19 complex; involved in the establishment of pericentromeric cohesion during mitosis; prevents non-disjunction of sister chromatids during meiosis II; forms a stable complex with Chl4p; required for localization of Sgo1p to pericentric sites during meiosis I; orthologous to human centromere constitutive-associated network (CCAN) subunit CENP-L and…	1.12143	0.965225	0.917186	1.17238	1.08243	1.02856	1.31474	0.557042	0.886418	0.640233	0.46467	0.725362	0.916051	0.0842685	no
YBR108W	AIM3	Protein that inhibits barbed-end actin filament elongation; interacts with Rvs167p; null mutant is viable and displays elevated frequency of mitochondrial genome loss	0.705317	1.01981	0.911723	0.856302	0.719289	0.643053	0.603964	0.000952557	0.91715	0.482769	0.305929	0.00323809	5.39257e-05	7.26575e-07	no
YBR109C	CMD1	Calmodulin; Ca2+ binding protein that regulates Ca2+ independent processes (mitosis, bud growth, actin organization, endocytosis, etc,) and Ca2+ dependent processes (stress-activated pathways), targets include Nuf1p, Myo2p and calcineurin; binds to the Hog1p MAPK in response to hyperosmotic stress; potentiates membrane tubulation and constriction mediated by the Rvs161p-Rvs167p complex; human CAL…	0.761827	1.03978	1.43496	1.22165	0.792131	1.09319	0.930682	0.0364087	0.849359	0.002293	0.199686	0.100704	0.615426	0.673297	no
YBR109W-A	NA	Putative protein of unknown function; questionable ORF from MIPS	0.446889	3.90262	4.0545	2.45187	1.74404	1.81191	1.09571	0.519055	0.197139	0.145355	0.547954	NA	0.608529	0.947851	no
YBR110W	ALG1	Mannosyltransferase; involved in asparagine-linked glycosylation in the endoplasmic reticulum (ER); essential for viability; human homolog ALG1 complements yeast null mutant	0.92718	1.0021	0.979454	1.11307	0.929125	0.90813	1.03202	0.442957	0.992327	0.846872	0.310769	0.494635	0.330509	0.7829	no
YBR111C	YSA1	Nudix hydrolase family member with ADP-ribose pyrophosphatase activity; shown to metabolize O-acetyl-ADP-ribose to AMP and acetylated ribose 5'-phosphate	0.924308	0.986825	1.07003	0.888	0.91213	0.989035	0.820786	0.41845	0.919055	0.45988	0.247527	0.36402	0.940492	0.0130337	no
YBR111W-A	SUS1	Component of both the SAGA histone acetylase and TREX-2 complexes; interacts with RNA polymerase II; involved in mRNA export coupled transcription activation and elongation; involved in post-transcriptional tethering of active genes to the nuclear periphery and to non-nascent mRNP	0.864883	1.16433	1.17329	1.20372	1.00701	1.01476	1.04107	0.434239	0.418752	0.334477	0.370047	0.98307	0.959634	0.859741	no
YBR112C	CYC8	General transcriptional co-repressor; acts together with Tup1p; also acts as part of a transcriptional co-activator complex that recruits the SWI/SNF and SAGA complexes to promoters; can form the prion [OCT+]	1.23246	0.882265	0.80055	0.901578	1.08735	0.986643	1.11115	0.03615	0.269415	0.0176155	0.459367	0.526234	0.940701	0.354195	no
YBR113W	NA	Dubious open reading frame; unlikely to encode a functional protein, based on available experimental and comparative sequence data; partially overlaps the verified gene CYC8	1.66486	0.515981	0.479566	0.942003	0.859034	0.798409	1.5683	NA	0.600481	0.495108	NA	NA	0.892204	0.722945	no
YBR114W	RAD16	Nucleotide excision repair (NER) protein; binds damaged DNA during NER; binds DNA in an ATP-dependent manner (with Rad7p) during NER; required for NER of non-transcribed chromatin; subunit of Nucleotide Excision Repair Factor 4 (NEF4) and the Elongin-Cullin-Socs (ECS) ligase complex	1.1785	1.06313	1.10403	1.2335	1.2529	1.3011	1.45368	0.165685	0.692006	0.406257	0.0784639	0.0536909	0.0213799	0.000164511	no
YBR115C	LYS2	Alpha aminoadipate reductase; catalyzes the reduction of alpha-aminoadipate to alpha-aminoadipate 6-semialdehyde, which is the fifth step in biosynthesis of lysine; activation requires posttranslational phosphopantetheinylation by Lys5p	2.70956	0.303148	0.494498	1.64665	0.821398	1.33987	4.46169	5.87697e-10	2.90898e-14	1.98503e-05	0.00732767	0.396615	0.167795	3.10889e-22	Gcn4
YBR116C	NA	Dubious open reading frame; unlikely to encode a functional protein, based on available experimental and comparative sequence data; partially overlaps the verified gene TKL2	0.389396	1	2.17182	3.2421	0.48042	0.845699	1.26246	NA	NA	NA	NA	NA	NA	NA	no
YBR117C	TKL2	Transketolase; catalyzes conversion of xylulose-5-phosphate and ribose-5-phosphate to sedoheptulose-7-phosphate and glyceraldehyde-3-phosphate in the pentose phosphate pathway; needed for synthesis of aromatic amino acids; TKL2 has a paralog, TKL1, that arose from the whole genome duplication	1.58546	0.665439	0.672364	1.10628	1.05502	1.066	1.75396	0.00243342	0.00749582	0.00703347	0.697565	0.84674	0.802058	0.000120293	no
YBR118W	TEF2	Translational elongation factor EF-1 alpha; in the GTP-bound active form, binds to and delivers aminoacylated tRNA to the A-site of ribosomes for elongation of nascent polypeptides; associates with vacuolar Rho1p GTPase; TEF2-RFP levels increase during replicative aging; may also have a role in tRNA re-export from the nucleus; TEF2 has a paralog, TEF1, that arose from the whole genome duplication	0.93304	1.02966	1.00149	1.05005	0.960718	0.93443	0.97974	0.442957	0.798529	0.986159	0.703092	0.707452	0.475365	0.85128	no
YBR119W	MUD1	U1 snRNP A protein; homolog of human U1-A; involved in nuclear mRNA splicing	0.944361	0.987556	1.07479	1.07438	0.932609	1.01498	1.0146	0.698452	0.947195	0.572557	0.700281	0.65134	0.940492	0.931234	no
YBR120C	CBP6	Mitochondrial protein required for translation of the COB mRNA; forms a complex with Cbp3p that binds to mt ribosomes near the polypeptide tunnel exit and promotes efficient translation of the COB mRNA; Cbp3p-Cbp6p complex also interacts with newly synthesized cytochrome b (Cobp) and Cbp4p to promote assembly of Cobp into the cytochrome bc1 complex; Cbp3p-Cbp6p complex is sequestered if assembly …	1.00175	0.718532	0.788483	0.734189	0.719786	0.789859	0.73547	0.996371	0.0212263	0.0997126	0.0489108	0.0319748	0.154296	0.0344612	no
YBR121C	GRS1	Cytoplasmic and mitochondrial glycyl-tRNA synthase; ligates glycine to the cognate anticodon-bearing tRNA; transcription termination factor that may interact with the 3'-end of pre-mRNA to promote 3'-end formation; GRS1 has a paralog, GRS2, that arose from the whole genome duplication; human homolog GARS implicated in Charcot-Marie-Tooth disease, can complement yeast null mutant	1.06948	0.951881	1.03458	1.09815	1.01802	1.10647	1.17445	0.362478	0.547198	0.652675	0.224332	0.866286	0.15556	0.006978	no
YBR121C-A	NA	Dubious open reading frame; unlikely to encode a functional protein, based on available experimental and comparative sequence data; completely contained within the verified gene GRS1; identified by expression profiling and mass spectrometry	NA	NA	NA	NA	NA	NA	NA	NA	NA	NA	NA	NA	NA	NA	no
YBR122C	MRPL36	Mitochondrial ribosomal protein of the large subunit; overproduction suppresses mutations in the COX2 leader peptide-encoding region	1.02295	0.727196	0.758625	0.819969	0.743884	0.776034	0.838786	0.891054	0.00161565	0.00617489	0.103793	0.00646934	0.0262939	0.12355	no
YBR123C	TFC1	Subunit of RNA polymerase III transcription initiation factor complex; one of six subunits of the RNA polymerase III transcription initiation factor complex (TFIIIC); part of the TauA globular domain of TFIIIC that binds DNA at the BoxA promoter sites of tRNA and similar genes; human homolog is TFIIIC-63	1.02504	1.04768	0.985582	0.912351	1.07391	1.01026	0.935197	0.867621	0.745822	0.911973	0.533386	0.603304	0.955236	0.596676	no
YBR124W	NA	Putative protein of unknown function	0.322629	0.585235	0.542971	1.07066	0.188814	0.175178	0.345428	NA	0.788266	0.707423	NA	NA	0.23482	0.426213	no
YBR125C	PTC4	Cytoplasmic type 2C protein phosphatase (PP2C); identified as a high-copy number suppressor of cnb1 mpk1 synthetic lethality; overexpression decreases high-osmolarity induced Hog1p phosphorylation and kinase activity	0.810458	1.07686	1.07913	1.15717	0.872752	0.874588	0.937836	0.00975058	0.488512	0.413109	0.129698	0.153115	0.16127	0.530903	no
YBR126C	TPS1	Synthase subunit of trehalose-6-P synthase/phosphatase complex; synthesizes the storage carbohydrate trehalose, which is critically important for survival of long-term desiccation; also found in a monomeric form; expression is induced by the stress response and repressed by the Ras-cAMP pathway; protein abundance increases in response to DNA replication stress and in response to prolonged exposur…	0.674119	0.845655	0.987446	0.880255	0.570072	0.665656	0.593396	0.00011194	0.177142	0.935906	0.412772	1.11617e-08	0.000159204	9.95209e-08	Gcn4
YBR126W-A	MEO1	Putative protein of unknown function; identified by gene-trapping, microarray analysis, and genome-wide homology searches; mRNA identified as translated by ribosome profiling data; SWAT-GFP, seamless-GFP and mCherry fusion proteins localize to the endoplasmic reticulum; partially overlaps the dubious ORF YBR126W-B	1.33322	1.7097	0.462963	1.89785	2.27941	0.617234	2.53026	0.821877	0.626776	0.470358	0.618768	NA	0.740897	0.341462	no
YBR126W-B	NA	Dubious open reading frame; unlikely to encode a functional protein, based on available experimental and comparative sequence data; partially overlaps the dubious ORF YBR126W-A; identified by SAGE	0.77856	0.640168	0.590307	0.631693	0.498409	0.45959	0.491811	NA	NA	NA	NA	NA	NA	NA	no
YBR127C	VMA2	Subunit B of V1 peripheral membrane domain of vacuolar H+-ATPase; electrogenic proton pump found throughout the endomembrane system; contains nucleotide binding sites; also detected in the cytoplasm; protein abundance increases in response to DNA replication stress; human homolog ATP6V1B1, implicated in autosomal-recessive distal renal tubular acidosis (RTA) with sensorineural deafness, complemen…	1.03986	0.867098	0.963766	1.1331	0.90166	1.00218	1.17826	0.5506	0.00364557	0.539377	0.0195036	0.0645125	0.982234	0.00058759	no
YBR128C	ATG14	Autophagy-specific subunit of phosphatidylinositol 3-kinase complex I; Atg14p targets complex I to the phagophore assembly site (PAS); required for localizing additional ATG proteins to the PAS; required for overflow degradation of misfolded proteins when ERAD is saturated; homolog of human Barkor; other members are Vps34, Vps15, and Vps30p	1.14419	1.05533	1.0512	0.995782	1.2075	1.20278	1.13937	0.647093	0.876629	0.861779	0.992185	0.528069	0.528337	0.661721	Gcn4
YBR129C	OPY1	Protein of unknown function; overproduction blocks cell cycle arrest in the presence of mating pheromone; the authentic, non-tagged protein is detected in highly purified mitochondria in high-throughput studies	0.860623	1.17544	1.03827	0.993739	1.01161	0.893564	0.855235	0.222552	0.186363	0.791682	0.979704	0.958383	0.418306	0.197037	no
YBR130C	SHE3	Protein adaptor between Myo4p and the She2p-mRNA complex; part of the mRNA localization machinery that restricts accumulation of certain proteins to the bud; also required for cortical ER inheritance	0.850589	1.19485	1.12965	1.03978	1.01632	0.960863	0.884428	0.0119813	0.00425373	0.0586833	0.740744	0.888741	0.669092	0.0705994	no
YBR131C-A	NA	Dubious open reading frame; unlikely to encode a functional protein, based on available experimental and comparative sequence data; partially overlaps the verified ORF YBR131W; identified by gene-trapping, microarray analysis, and genome-wide homology searches	NA	NA	NA	NA	NA	NA	NA	NA	NA	NA	NA	NA	NA	NA	no
YBR131W	CCZ1	Subunit of a heterodimeric guanine nucleotide exchange factor (GEF); subunit of the Mon1-Ccz1 GEF complex, which stimulates nucleotide exchange and activation of Ypt7p, a Rab family GTPase involved in membrane tethering and fusion events at the late endosome and vacuole; GEF activity is stimulated by membrane association and anionic phospholipids; involved in localizing Ypt7p to the vacuolar memb…	1.08112	1.01998	0.90521	1.17048	1.10272	0.978637	1.26543	0.698452	0.935278	0.568634	0.448427	0.641615	0.935391	0.13564	no
YBR132C	AGP2	Plasma membrane regulator of polyamine and carnitine transport; has similarity to transporters but lacks transport activity; may act as a sensor that transduces environmental signals; has a positive or negative regulatory effect on transcription of many transporter genes	1.10403	0.764797	1.24151	1.23256	0.844357	1.37066	1.36079	0.714303	0.235843	0.294225	0.441583	0.532215	0.159923	0.140687	no
YBR133C	HSL7	Protein arginine N-methyltransferase; exhibits septin and Hsl1p-dependent localization to the bud neck in budded cells and periodic Hsl1p-dependent phosphorylation; required with Hsl1p, and Elm1p for the mother-bud neck recruitment, phosphorylation, and degradation of Swe1p; interacts directly with Swe1p; relocalizes away from bud neck upon DNA replication stress; human homolog PRMT5 can compleme…	0.991397	0.976386	1.01326	0.909518	0.967986	1.00455	0.901694	0.935383	0.814064	0.880949	0.247979	0.734889	0.971281	0.140036	no
YBR134W	NA	Dubious open reading frame; unlikely to encode a functional protein, based on available experimental and comparative sequence data	0.486711	0.757391	0.128999	1.07619	0.36863	0.0627853	0.523794	NA	0.902562	0.205305	NA	NA	0.0980793	0.703719	no
YBR135W	CKS1	Cyclin-dependent protein kinase regulatory subunit and adaptor; interacts with Cdc28p (aka Cdk1p); required for G1/S and G2/M phase transitions and budding; mediates phosphorylation and degradation of Sic1p; modulates proteolysis of M-phase targets through interactions with the proteasome; role in transcriptional regulation, recruiting proteasomal subunits to target gene promoters; human homologs…	0.887336	1.10899	0.939679	1.00443	0.984045	0.833811	0.891265	0.379503	0.475435	0.654395	0.985823	0.942575	0.167795	0.388436	no
YBR136W	MEC1	Genome integrity checkpoint protein and PI kinase superfamily member; Mec1p and Dun1p function in same pathway to regulate dNTP pools and telomere length; signal transducer required for cell cycle arrest and transcriptional responses to damaged or unreplicated DNA; facilitates replication fork progression and regulates P-body formation under replication stress; promotes interhomolog recombination…	0.956438	1.13578	1.01894	1.09816	1.0863	0.974551	1.05033	0.744828	0.250925	0.886821	0.517087	0.527779	0.872688	0.711352	no
YBR137W	NA	Protein with a role in ER delivery of tail-anchored membrane proteins; interacts with Sgt2p; binds to the TRC complex, which inserts proteins into the ER membrane; interacts with Msn5p karyopherin; YBR137W is not an essential gene	0.919988	0.903934	1.0832	1.21523	0.831608	0.996528	1.11799	0.606841	0.535784	0.585312	0.190609	0.205676	0.988307	0.450279	no
YBR138C	NA	Cytoplasmic protein of unknown function; APCC(Cdh1) substrate; potentially phosphorylated by Cdc28p; YBR138C is not an essential gene	0.858612	0.91699	0.976842	0.878906	0.787338	0.838728	0.754639	0.349894	0.661318	0.901069	0.547534	0.131969	0.295649	0.049019	no
YBR139W	NA	Putative serine type carboxypeptidase; role in phytochelatin synthesis; green fluorescent protein (GFP)-fusion protein localizes to the vacuole; expression induced by nitrogen limitation in a GLN3, GAT1-independent manner	0.961991	0.762112	0.879227	0.850237	0.733145	0.845809	0.81792	0.833816	0.036358	0.352227	0.340763	0.0201073	0.274164	0.14195	Gcn4
YBR140C	IRA1	GTPase-activating protein; negatively regulates RAS by converting it from GTP- to the GDP-bound inactive form, required for reducing cAMP levels under nutrient limiting conditions, mediates membrane association of adenylate cyclase; mutations cause catalase T deficiency, defective glycogen synthesis and defective trehalose accumulation; IRA1 has a paralog, IRA2, that arose from the whole genome d…	1.09684	0.909166	1.00746	0.997022	0.997211	1.10503	1.09358	0.317133	0.307649	0.947647	0.986002	0.985508	0.298465	0.325433	no
YBR141C	BMT2	Nucleolar S-adenosylmethionine-dependent rRNA methyltransferase; methylates adenine (m1A) of the large subunit (LSU) rRNA at position 2142; belongs to Rossmann fold superfamily; green fluorescent protein (GFP)-fusion protein localizes to the nucleolus; YBR141C is not an essential gene	1.06865	1.0299	1.06294	0.99323	1.10061	1.13591	1.06141	0.645826	0.865018	0.638666	0.977968	0.510693	0.337907	0.685842	no
YBR141W-A	NA	Dubious open reading frame; unlikely to encode a functional protein, based on available experimental and comparative sequence data; overlaps the uncharacterized ORF YBR141C; identified by gene-trapping, microarray analysis, and genome-wide homology searching	NA	NA	NA	NA	NA	NA	NA	NA	NA	NA	NA	NA	NA	NA	no
YBR142W	MAK5	Essential nucleolar protein; putative DEAD-box RNA helicase required for maintenance of M1 dsRNA virus; involved in biogenesis of large (60S) ribosomal subunits	0.99399	1.0398	1.03385	1.01365	1.03355	1.02764	1.00755	0.967939	0.772262	0.768739	0.94414	0.817579	0.847921	0.95709	no
YBR143C	SUP45	Polypeptide release factor (eRF1) in translation termination; mutant form acts as a recessive omnipotent suppressor; methylated by Mtq2p-Trm112p in ternary complex eRF1-eRF3-GTP; mutation of methylation site confers resistance to zymocin; has a role in cytokinesis through interaction with Mlc1p	1.0275	1.00496	1.13135	1.1059	1.03259	1.16246	1.13631	0.764051	0.965224	0.0496092	0.195282	0.732954	0.026277	0.0485625	no
YBR144C	NA	Dubious open reading frame; unlikely to encode a functional protein, based on available experimental and comparative sequence data; YBR144C is not an essential gene	1.555	0.841943	0.836685	2.75944	1.30922	1.30105	4.29093	0.604271	0.865018	0.829846	0.132343	0.796792	0.797551	0.0175449	no
YBR145W	ADH5	Alcohol dehydrogenase isoenzyme V; involved in ethanol production; ADH5 has a paralog, ADH1, that arose from the whole genome duplication	4.26493	0.127949	0.31513	1.93905	0.545694	1.34401	8.2699	9.37739e-25	1.00582e-47	4.36473e-16	1.58272e-05	0.000219155	0.119716	2.47597e-53	Gcn4
YBR146W	MRPS9	Mitochondrial ribosomal protein of the small subunit	1.11506	0.617727	0.598821	0.725913	0.688804	0.667723	0.809438	0.459936	8.04884e-06	1.76541e-06	0.00902302	0.00159525	0.000764905	0.0935815	no
YBR147W	RTC2	Putative vacuolar membrane transporter for cationic amino acids; likely contributes to amino acid homeostasis by exporting cationic amino acids from the vacuole; positive regulation by Lys14p suggests that lysine may be the primary substrate; member of the PQ-loop family, with seven transmembrane domains; similar to mammalian PQLC2 vacuolar transporter; RTC2 has a paralog, YPQ1, that arose from t…	5.81132	0.0682424	0.318943	2.29629	0.396579	1.85348	13.3445	1.18018e-07	5.7077e-16	0.000713489	0.031332	0.0263157	0.154122	2.27851e-16	Gcn4
YBR148W	YSW1	Protein required for normal prospore membrane formation; interacts with Gip1p, which is the meiosis-specific regulatory subunit of the Glc7p protein phosphatase; expressed specifically in spores and localizes to the prospore membrane; YSW1 has a paralog, SPO21, that arose from the whole genome duplication	0.954049	0.951104	1.12698	1.66466	0.9074	1.07519	1.58816	0.893091	0.894094	0.661212	0.0272179	0.784724	0.839322	0.0371626	Gcn4
YBR149W	ARA1	NADP+ dependent arabinose dehydrogenase; involved in carbohydrate metabolism; purified as homodimer; naturally occurs with a N-terminus degradation product	0.959161	0.932658	1.2285	1.04573	0.894569	1.17833	1.00302	0.769137	0.61163	0.0341621	0.817002	0.37998	0.154096	0.984573	no
YBR150C	TBS1	Protein of unknown function; the authentic, non-tagged protein is detected in highly purified mitochondria in high-throughput studies; TBS1 has a paralog, HAL9, that arose from the whole genome duplication	1.08791	1.05857	0.825942	0.9058	1.15163	0.898552	0.985431	0.565919	0.733648	0.0981859	0.579706	0.3186	0.477447	0.93482	no
YBR151W	APD1	Protein of unknown function; required for normal localization of actin patches and for normal tolerance of sodium ions and hydrogen peroxide; localizes to both cytoplasm and nucleus	0.830321	1.16077	1.05198	1.00983	0.963808	0.873479	0.838481	0.245202	0.387301	0.781325	0.976144	0.880579	0.452154	0.265315	no
YBR152W	SPP381	mRNA splicing factor, component of U4/U6,U5 tri-snRNP; interacts genetically and physically with Prp38p; relocalizes to the cytosol in response to hypoxia	1.07994	1.19463	0.976028	1.0164	1.29013	1.05405	1.09765	0.633358	0.175801	0.881754	0.953827	0.0508513	0.780226	0.5449	no
YBR153W	RIB7	Diaminohydroxyphoshoribosylaminopyrimidine deaminase; catalyzes the second step of the riboflavin biosynthesis pathway	1.35763	0.821859	0.723	1.08956	1.11578	0.981564	1.47922	0.0057264	0.105544	0.00205401	0.642953	0.466899	0.928658	0.000190913	no
YBR154C	RPB5	RNA polymerase subunit ABC27; common to RNA polymerases I, II, and III; contacts DNA and affects transactivation	0.919666	1.14591	1.13272	1.07361	1.05386	1.04173	0.987363	0.256901	0.0379552	0.0499052	0.438927	0.547718	0.656582	0.898254	no
YBR155W	CNS1	TPR-containing co-chaperone; binds both Hsp82p (Hsp90) and Ssa1p (Hsp70); stimulates ATPase activity of Ssa1p; ts mutants reduce Hsp82p function, overexpression suppresses phenotypes of HSP82 ts allele and cpr7 deletion; human homolog TTC4 complements yeast cns1 mutant	1.0962	0.994422	0.938145	1.05962	1.09009	1.02839	1.16156	0.274589	0.965426	0.440312	0.626674	0.343058	0.806404	0.043322	no
YBR156C	SLI15	Subunit of the conserved chromosomal passenger complex (CPC); complex regulates kinetochore-microtubule attachments, activation of the spindle tension checkpoint, and mitotic spindle disassembly; other complex members are Ipl1p, Bir1p, and Nbl1p	1.11949	0.978982	0.951855	1.03008	1.09596	1.06559	1.15316	0.442082	0.914415	0.74191	0.905732	0.584276	0.720616	0.294968	no
YBR157C	ICS2	Protein of unknown function; null mutation does not confer any obvious defects in growth, spore germination, viability, or carbohydrate utilization	0.891635	1.67622	1.39571	0.819847	1.49458	1.24446	0.731004	0.54555	8.66958e-05	0.0168797	0.330145	0.00619193	0.203301	0.0445527	no
YBR158W	AMN1	Protein required for daughter cell separation; multiple mitotic checkpoints, and chromosome stability; contains 12 degenerate leucine-rich repeat motifs; expression is induced by the Mitotic Exit Network (MEN)	0.985286	1.15164	1.25266	0.99493	1.13469	1.23423	0.98029	0.853736	0.00584612	1.85201e-06	0.968163	0.0231559	3.93091e-05	0.794499	no
YBR159W	IFA38	Microsomal beta-keto-reductase; contains oleate response element (ORE) sequence in the promoter region; mutants exhibit reduced VLCFA synthesis, accumulate high levels of dihydrosphingosine, phytosphingosine and medium-chain ceramides	0.930476	1.07029	1.0646	0.988259	0.995882	0.990588	0.919551	0.187419	0.226592	0.230113	0.909996	0.968031	0.913368	0.112373	no
YBR160W	CDC28	Cyclin-dependent kinase (CDK) catalytic subunit; master regulator of mitotic and meiotic cell cycles; alternately associates with G1, S, G2/M phase cyclins, which provide substrate specificity; regulates metabolism, basal transcription, chromosome dynamics, growth and morphogenesis; transcript induction in osmostress involves antisense RNA; human homologs CDK1, CDK2, CDK3 can complement yeast con…	0.718786	1.11923	1.1997	0.952912	0.804487	0.862328	0.68494	2.43829e-10	0.0761524	0.000961863	0.631039	0.00012171	0.0176295	3.92041e-13	no
YBR161W	CSH1	Mannosylinositol phosphorylceramide (MIPC) synthase catalytic subunit; forms a complex with regulatory subunit Csg2p; function in sphingolipid biosynthesis is overlapping with that of Sur1p; CSH1 has a paralog, SUR1, that arose from the whole genome duplication	0.890169	1.23382	1.2445	0.9921	1.09831	1.10781	0.883136	0.518908	0.185911	0.130309	0.980231	0.641615	0.603531	0.477531	no
YBR162C	TOS1	Covalently-bound cell wall protein of unknown function; identified as a cell cycle regulated SBF target gene; deletion mutants are highly resistant to treatment with beta-1,3-glucanase; has sequence similarity to YJL171C	1.15701	0.912971	1.14972	1.18482	1.05631	1.33023	1.37085	0.0245172	0.210875	0.0247079	0.00999762	0.526548	2.40894e-06	2.39486e-08	no
YBR162W-A	YSY6	Protein of unknown function; expression suppresses a secretory pathway mutation in E, coli; has similarity to the mammalian RAMP4 protein involved in secretion	0.797761	1.01106	1.0128	1.14056	0.806585	0.807976	0.909897	0.481181	0.983893	0.972664	0.785626	0.539393	0.536929	0.79876	no
YBR163W	EXO5	Mitochondrial 5'-3' exonuclease and sliding exonuclease; required for mitochondrial genome maintenance; distantly related to the RecB nuclease domain of bacterial RecBCD recombinases; may be regulated by the transcription factor Ace2	1.05943	1.05187	0.988693	0.997203	1.11438	1.04745	1.05647	0.592429	0.661318	0.919996	0.98699	0.281933	0.701708	0.610027	no
YBR164C	ARL1	Soluble GTPase with a role in regulation of membrane traffic; regulates potassium influx; role in membrane organization at trans-Golgi network; required for delivery of Atg9p to the phagophore assembly site during autophagy under high temperature stress; required with Ypt6p for starvation-induced autophagy; required for the CVT pathway under non-starvation conditions; G protein of the Ras superfa…	0.808337	1.1012	1.36644	1.16816	0.890142	1.10454	0.944262	0.00843206	0.329261	2.36787e-05	0.096908	0.235365	0.317511	0.582793	no
YBR165W	UBS1	Ubiquitin-conjugating enzyme suppressor that regulates Cdc34p; functions as a general positive regulator of Cdc34p activity; nuclear protein that may represent a link between nucleocytoplasmic transport and ubiquitin ligase activity	0.949804	0.968823	0.966659	1.10855	0.920191	0.918136	1.05291	0.709091	0.844549	0.793804	0.476898	0.546223	0.522574	0.706118	no
YBR166C	TYR1	Prephenate dehydrogenase involved in tyrosine biosynthesis; expression is dependent on phenylalanine levels	1.24066	0.770527	0.886933	1.31178	0.955965	1.10039	1.62748	0.00849437	0.000836424	0.163671	0.000734481	0.716018	0.357269	1.35084e-11	no
YBR167C	POP7	Subunit of RNase MRP, nuclear RNase P and telomerase; forms a soluble heterodimer with Pop6p that binds P3 domain of RNase MRP and RNase P RNAs; RNase MRP cleaves pre-rRNA, nuclear RNase P cleaves tRNA precursors to generate mature 5' ends and facilitates turnover of nuclear RNAs, while telomerase replenishes telomeric DNA	0.979676	0.988785	1.20851	1.06363	0.968689	1.18394	1.04201	0.893862	0.947665	0.0468774	0.724554	0.850353	0.132795	0.770605	no
YBR168W	PEX32	Peroxisomal integral membrane protein; involved in negative regulation of peroxisome size; partially functionally redundant with Pex31p; genetic interactions suggest action at a step downstream of steps mediated by Pex28p and Pex29p	1.00237	1.07549	1.05958	1.02662	1.07804	1.06209	1.02905	0.995047	0.738228	0.753824	0.934492	0.731851	0.791867	0.900662	no
YBR169C	SSE2	Member of Hsp110 subclass of the heat shock protein 70 (HSP70) family; serves as nucleotide exchange factor to load ATP onto the SSA class of cytosolic Hsp70s; may be involved in protein folding; localized to the cytoplasm; SSE2 has a paralog, SSE1, that arose from the whole genome duplication	1.00338	0.956184	0.499668	0.689208	0.959413	0.501355	0.691535	0.995881	0.91715	0.00482548	0.266395	0.935196	0.0117607	0.196766	no
YBR170C	NPL4	Substrate-recruiting cofactor of the Cdc48p-Npl4p-Ufd1p segregase; assists Cdc48p in the dislocation of misfolded, polyubiquitinated ERAD substrates that are subsequently delivered to the proteasome for degradation; also involved in the regulated destruction of resident ER membrane proteins, such as HMG-CoA reductase (Hmg1/2p) and cytoplasmic proteins (Fbp1p); role in mobilizing membrane bound tr…	0.758224	1.02038	1.15378	0.998114	0.773675	0.874828	0.756794	0.0080489	0.910416	0.202696	0.993357	0.0215775	0.299552	0.00706076	no
YBR171W	SEC66	Non-essential subunit of Sec63 complex; with Sec61 complex, Kar2p/BiP and Lhs1p forms a channel competent for SRP-dependent and post-translational SRP-independent protein targeting and import into the ER; other members are Sec63p, Sec62p, and Sec72p	0.849099	1.23155	1.29322	1.01352	1.04571	1.09807	0.860578	0.0012443	1.31111e-05	3.15805e-08	0.905732	0.532215	0.117778	0.00353106	no
YBR172C	SMY2	GYF domain protein; involved in COPII vesicle formation; interacts with the Sec23p/Sec24p subcomplex; overexpression suppresses the temperature sensitivity of a myo2 mutant; similar to S, pombe Mpd2; SMY2 has a paralog, SYH1, that arose from the whole genome duplication	1.22958	0.926597	0.865887	0.960117	1.13933	1.06468	1.18055	0.00766337	0.441497	0.0673408	0.78279	0.152231	0.56072	0.0380939	no
YBR173C	UMP1	Chaperone required for correct maturation of the 20S proteasome; short-lived chaperone; may inhibit premature dimerization of proteasome half-mers; degraded by proteasome upon completion of its assembly	0.641533	1.23675	1.59725	0.980162	0.793415	1.02469	0.628806	1.23089e-07	0.0247994	1.37424e-08	0.921317	0.0170857	0.873257	2.29038e-08	no
YBR174C	NA	Dubious open reading frame; unlikely to encode a functional protein, based on available experimental and comparative sequence data; partially overlaps the verified ORF YBR175W; null mutant is viable and sporulation defective	0.635683	1.59129	0.373577	1.85547	1.01155	0.237477	1.17949	NA	NA	NA	NA	NA	NA	NA	no
YBR175W	SWD3	Essential subunit of the COMPASS (Set1C) complex; COMPASS methylates histone H3 on lysine 4 and is required in transcriptional silencing near telomeres; WD40 beta propeller superfamily member and ortholog of mammalian WDR5	0.935659	1.16806	1.3703	1.03882	1.09291	1.28213	0.971981	0.652773	0.208796	0.00153854	0.864871	0.553476	0.0330837	0.866811	no
YBR176W	ECM31	Ketopantoate hydroxymethyltransferase; required for pantothenic acid biosynthesis, converts 2-oxoisovalerate into 2-dehydropantoate	1.14791	0.808489	0.868043	1.31381	0.928076	0.996439	1.50814	0.296708	0.0766519	0.241573	0.0192787	0.64833	0.98754	7.26869e-05	no
YBR177C	EHT1	Acyl-coenzymeA:ethanol O-acyltransferase; plays a minor role in medium-chain fatty acid ethyl ester biosynthesis; possesses short-chain esterase activity; localizes to lipid particles and the mitochondrial outer membrane; EHT1 has a paralog, EEB1, that arose from the whole genome duplication	0.942835	0.556026	1.16633	1.29018	0.524241	1.09965	1.21642	0.621783	1.49346e-13	0.0880846	0.00462355	4.79398e-16	0.399486	0.0288766	no
YBR178W	NA	Dubious open reading frame; unlikely to encode a functional protein, based on available experimental and comparative sequence data; partially overlaps the verified gene YBR177C	0.412634	3.14036	0.450064	0.474112	1.29582	0.185712	0.195635	NA	NA	NA	NA	NA	NA	NA	no
YBR179C	FZO1	Mitofusin; integral membrane protein involved in mitochondrial outer membrane tethering and fusion; role in mitochondrial genome maintenance; efficient tethering and degradation of Fzo1p requires an intact N-terminal GTPase domain; targeted for destruction by the ubiquitin ligase SCF-Mdm30p and the cytosolic ubiquitin-proteasome system	1.1285	0.76963	0.747084	0.930253	0.868528	0.843084	1.04979	0.149519	0.000246672	2.99104e-05	0.532113	0.111941	0.0460296	0.634712	no
YBR180W	DTR1	Putative dityrosine transporter of the major facilitator superfamily; member of the 12-spanner drug:H(+) antiporter DHA1 family; required for spore wall synthesis; sequence similarity to QDR1 and QDR3, and the triple mutant dtr1 qdr1 qdr3 exhibits reduced dityrosine fluorescence relative to the single mutants; expressed during sporulation	0.897098	1.56686	1.46807	0.817955	1.40563	1.317	0.733786	0.726274	0.0431843	0.0773999	0.575908	0.179788	0.299035	0.227082	no
YBR181C	RPS6B	Protein component of the small (40S) ribosomal subunit; homologous to mammalian ribosomal protein S6, no bacterial homolog; phosphorylated on S233 by Ypk3p in a TORC1-dependent manner, and on S232 in a TORC1/2-dependent manner by Ypk1/2/3p; RPS6B has a paralog, RPS6A, that arose from the whole genome duplication	0.952354	1.02573	0.926667	1.08459	0.976861	0.882515	1.03291	0.519827	0.782726	0.233463	0.303384	0.805321	0.0571844	0.689941	no
YBR182C	SMP1	MADS-box transcription factor involved in osmotic stress response; SMP1 has a paralog, RLM1, that arose from the whole genome duplication	0.50412	1.35745	1.15453	0.723369	0.684317	0.582023	0.364665	0.0011979	0.236205	0.597609	0.285351	0.129757	0.0213799	8.00391e-07	no
YBR182C-A	NA	Putative protein of unknown function; identified by gene-trapping, microarray-based expression analysis, and genome-wide homology searching	0.791652	0.684892	1.2668	0.638855	0.542196	1.00287	0.505751	0.87924	0.81508	0.856836	0.823282	NA	0.999256	0.608966	no
YBR183W	YPC1	Alkaline ceramidase; also has reverse (CoA-independent) ceramide synthase activity; catalyzes both breakdown and synthesis of phytoceramide; overexpression confers fumonisin B1 resistance; YPC1 has a paralog, YDC1, that arose from the whole genome duplication	0.607336	1.23053	0.384638	0.729196	0.747343	0.233604	0.442866	0.00599169	0.363671	1.27199e-07	0.177061	0.174965	1.73631e-16	2.18955e-06	no
YBR184W	NA	Putative protein of unknown function; YBR184W is not an essential gene	0.981046	1.05518	1.43916	1.05642	1.03518	1.41188	1.03639	0.944523	0.83872	0.0166807	0.867843	0.9126	0.0503031	0.890771	no
YBR185C	MBA1	Membrane-associated mitochondrial ribosome receptor; forms a complex with Mdm38p that may facilitate recruitment of mRNA-specific translational activators to ribosomes; possible role in protein export from the matrix to inner membrane	1.2139	0.758546	0.749792	0.734774	0.920799	0.910171	0.891942	0.0968337	0.0101454	0.00528833	0.00567826	0.599189	0.524483	0.386316	no
YBR186W	PCH2	Hexameric ring ATPase that remodels chromosome axis protein Hop1p; nucleolar component of the pachytene checkpoint, which prevents chromosome segregation when recombination and chromosome synapsis are defective; also represses meiotic interhomolog recombination in rDNA; required for meiotic double-stranded break formation	0.987818	1.12569	1.31955	0.9267	1.11198	1.30347	0.915411	0.960585	0.523013	0.0424648	0.775635	0.599069	0.0950418	0.649052	no
YBR187W	GDT1	Calcium transporter localized to the cis- and medial-Golgi apparatus; required for protein glycosylation; GFP-fusion protein localizes to the vacuole; TMEM165, a human gene which causes Congenital Disorders of Glycosylation is orthologous and functionally complements the null allele; expression pattern and physical interactions suggest a possible role in ribosome biogenesis; expression reduced in…	1.03147	0.937329	0.91143	1.13826	0.966824	0.94011	1.17408	0.789367	0.549099	0.294028	0.189411	0.791908	0.580196	0.0537959	no
YBR188C	NTC20	Member of the NineTeen Complex (NTC); this complex contains Prp19p and stabilizes U6 snRNA in catalytic forms of the spliceosome containing U2, U5, and U6 snRNAs	0.771397	1.14238	1.22647	1.29078	0.881232	0.946097	0.9957	0.100052	0.486592	0.186323	0.141503	0.526434	0.809141	0.984916	no
YBR189W	RPS9B	Protein component of the small (40S) ribosomal subunit; homologous to mammalian ribosomal protein S9 and bacterial S4; RPS9B has a paralog, RPS9A, that arose from the whole genome duplication	0.984905	1.04131	0.983245	1.10486	1.02559	0.968402	1.08818	0.891054	0.695482	0.860982	0.28114	0.829155	0.7684	0.29517	no
YBR190W	NA	Dubious open reading frame; unlikely to encode a functional protein, based on available experimental and comparative sequence data; partially overlaps the verified ribosomal protein gene RPL21A/YBR191W	1.7375	0.597372	0.443198	3.37418	1.03793	0.770055	5.86262	0.560705	0.605677	0.32742	0.0928909	NA	0.839389	0.00988552	no
YBR191W	RPL21A	Ribosomal 60S subunit protein L21A; homologous to mammalian ribosomal protein L21, no bacterial homolog; RPL21A has a paralog, RPL21B, that arose from the whole genome duplication	1.07374	0.991083	0.945893	1.03138	1.06416	1.01564	1.10743	0.503158	0.951534	0.581988	0.85636	0.599675	0.916226	0.285712	no
YBR191W-A	NA	Dubious open reading frame; unlikely to encode a functional protein, based on available experimental and comparative sequence data	1.26919	0.560823	1.3863	0.979782	0.711792	1.75948	1.24353	NA	NA	NA	NA	NA	NA	NA	no
YBR192W	RIM2	Mitochondrial pyrimidine nucleotide transporter; imports pyrimidine nucleoside triphosphates and exports pyrimidine nucleoside monophosphates; member of the mitochondrial carrier family	1.16405	0.780027	0.720332	0.847941	0.907988	0.838499	0.987042	0.156619	0.00957746	0.000270054	0.157018	0.453826	0.117376	0.931888	no
YBR193C	MED8	Subunit of the RNA polymerase II mediator complex; associates with core polymerase subunits to form the RNA polymerase II holoenzyme; essential for transcriptional regulation	0.866577	1.01522	1.38249	1.11183	0.879764	1.19804	0.963485	0.119659	0.916023	1.60394e-05	0.363904	0.210384	0.0473309	0.758438	no
YBR194W	AIM4	Protein proposed to be associated with the nuclear pore complex; null mutant is viable, displays elevated frequency of mitochondrial genome loss and is sensitive to freeze-thaw stress	0.811593	1.04976	1.09441	0.936231	0.85198	0.888218	0.759839	0.408054	0.888247	0.73074	0.878499	0.582484	0.694952	0.241736	no
YBR195C	MSI1	Subunit of chromatin assembly factor I (CAF-1); chromatin assembly by CAF-1 affects multiple processes including silencing at telomeres, mating type loci, and rDNA; maintenance of kinetochore structure; deactivation of DNA damage checkpoint after DNA repair; chromatin dynamics during transcription; and repression of divergent noncoding transcription; Msi1p localizes to nucleus and cytoplasm and i…	0.992141	1.14591	1.06725	0.929332	1.1369	1.05887	0.922029	0.955346	0.121965	0.489157	0.568048	0.17932	0.620927	0.413354	no
YBR196C	PGI1	Glycolytic enzyme phosphoglucose isomerase; catalyzes the interconversion of glucose-6-phosphate and fructose-6-phosphate; required for cell cycle progression and completion of the gluconeogenic events of sporulation	0.969131	0.934405	0.966488	1.03777	0.90556	0.936653	1.00573	0.767803	0.480685	0.71783	0.792628	0.271848	0.503104	0.961435	no
YBR196C-A	NA	Putative protein of unknown function; identified by fungal homology and RT-PCR	0.956379	0.904901	1.12541	1.84081	0.865428	1.07632	1.76051	0.962342	0.910416	0.871301	0.40969	0.877074	0.940668	0.359456	no
YBR196C-B	NA	Putative protein of unknown function; identified by expression profiling and mass spectrometry	1.03476	1.0825	1.02635	1.71193	1.12012	1.06202	1.77142	0.957887	0.898595	0.962553	0.251554	0.859061	0.928658	0.152442	no
YBR197C	NA	Protein of unknown function; green fluorescent protein (GFP)-fusion protein localizes to the cytoplasm and nucleus; YBR197C is not an essential gene; relative distribution to the nucleus increases upon DNA replication stress; YBR197C has a paralog, YPL077C, that arose from the whole genome duplication	1.14014	1.02007	1.04862	1.32522	1.16302	1.19557	1.51093	0.287029	0.910416	0.719458	0.00800119	0.235685	0.145311	1.72273e-05	no
YBR198C	TAF5	Subunit (90 kDa) of TFIID and SAGA complexes; involved in RNA polymerase II transcription initiation and in chromatin modification	0.958257	1.03125	0.980425	0.969082	0.988203	0.9395	0.92863	0.664234	0.784306	0.838621	0.825446	0.933788	0.518005	0.392264	no
YBR199W	KTR4	Glycosyltransferase involved in protein glycosylation; transfers GDP-mannose to methyl-alpha-mannoside in vitro; member of the KRE2/MNT1 mannosyltransferase family of type II membrane proteins with a short cytoplasmic N-terminus, a membrane-spanning region and a highly conserved catalytic lumenal domain	0.855366	1.10233	1.0437	1.08803	0.942899	0.89275	0.930667	0.00554165	0.120659	0.527709	0.253325	0.431682	0.0781808	0.271434	no
YBR200W	BEM1	Protein containing SH3-domains; involved in establishing cell polarity and morphogenesis; functions as a scaffold protein for complexes that include Cdc24p, Ste5p, Ste20p, and Rsr1p	0.942336	0.954872	0.987307	1.00201	0.89981	0.930375	0.944231	0.445837	0.594386	0.882613	0.987013	0.154894	0.363829	0.458973	no
YBR200W-A	NA	Putative protein of unknown function; identified by fungal homology and RT-PCR	0.213459	4.9328	1	1	1.05295	0.242842	0.259867	NA	NA	NA	NA	NA	NA	NA	no
YBR201C-A	NA	Putative protein of unknown function	0.708578	0.98361	1.41419	0.968901	0.696964	1.00206	0.686542	0.464874	0.983893	0.42074	0.971452	0.476227	0.99827	0.413238	no
YBR201W	DER1	ER membrane protein that promotes export of misfolded polypeptides; required for ER-associated protein degradation of misfolded or unassembled proteins; initiates export of aberrant polypeptides from ER lumen by threading them into ER membrane and routing them to Hrd1p for ubiquitination; function normally requires N-terminal acetylation by NatB; N- and C- termini protrude into cytoplasm; similar…	0.785807	1.12828	0.886615	0.999405	0.886609	0.696708	0.785339	0.112998	0.517031	0.469985	0.998449	0.529199	0.0178611	0.112638	no
YBR202W	MCM7	Component of the Mcm2-7 hexameric helicase complex; MCM2-7 primes origins of DNA replication in G1 and becomes an active ATP-dependent helicase that promotes DNA melting and elongation in S-phase; forms an Mcm4p-6p-7p subcomplex	1.19808	0.800048	0.69587	1.04283	0.958521	0.833707	1.24939	0.0089686	0.000676588	5.60584e-09	0.735694	0.679723	0.0169427	0.000756145	no
YBR203W	COS111	Protein required for antifungal drug ciclopirox olamine resistance; not related to the subtelomerically-encoded COS family; the authentic, non-tagged protein is detected in highly purified mitochondria in high-throughput studies	0.744994	1.08718	1.7935	0.955004	0.809942	1.33614	0.711472	0.0124021	0.612085	1.1712e-08	0.848205	0.118456	0.0176295	0.0031735	no
YBR204C	LDH1	Serine hydrolase; exhibits active esterase plus weak triacylglycerol lipase activities; proposed role in lipid homeostasis, regulating phospholipid and non-polar lipid levels and required for mobilization of LD-stored lipids; localizes to the lipid droplet (LD) surface; contains a classical serine containing catalytic triad (GxSxG motif)	0.708722	1.18718	1.22618	1.02255	0.841381	0.86902	0.724706	0.000722047	0.153733	0.0576336	0.925946	0.165368	0.278119	0.00182355	no
YBR205W	KTR3	Putative alpha-1,2-mannosyltransferase; involved in O- and N-linked protein glycosylation; member of the KRE2/MNT1 mannosyltransferase family; Svp26p mediates uptake of Ktr3p into COPII vesicles; relocalizes from nucleus to vacuole upon DNA replication stress	0.940932	1.03028	1.06901	0.986656	0.969419	1.00586	0.928377	0.410743	0.744411	0.314311	0.918324	0.733894	0.959973	0.290064	no
YBR206W	NA	Dubious open reading frame; unlikely to encode a functional protein, based on available experimental and comparative sequence data; partially overlaps the verified gene KTR3	1.27464	0.319626	0.706391	0.492711	0.407408	0.900395	0.62803	NA	0.417656	0.791663	NA	NA	0.957562	0.762567	no
YBR207W	FTH1	Putative high affinity iron transporter; involved in transport of intravacuolar stores of iron; forms complex with Fet5p; expression is regulated by iron; proposed to play indirect role in endocytosis; protein abundance increases in response to DNA replication stress	1.17699	0.831734	0.805761	0.8881	0.978939	0.94837	1.04528	0.0279365	0.00999616	0.0014242	0.176936	0.868095	0.608427	0.653298	no
YBR208C	DUR1,2	Urea amidolyase; contains both urea carboxylase and allophanate hydrolase activities, degrades urea to CO2 and NH3; expression sensitive to nitrogen catabolite repression and induced by allophanate, an intermediate in allantoin degradation; protein abundance increases in response to DNA replication stress	0.948303	0.720308	0.634616	0.876154	0.68307	0.601808	0.83086	0.725481	0.00166491	4.86293e-06	0.379419	0.000352163	1.18372e-06	0.111407	no
YBR209W	NA	Dubious open reading frame; unlikely to encode a functional protein, based on available experimental and comparative sequence data; YBR209W is not an essential gene	0.646804	1.51653	2.55627	1.67793	0.9809	1.65341	1.08529	0.479396	0.523203	0.0525016	0.473267	0.985023	0.409639	0.913414	no
YBR210W	ERV15	Protein involved in export of proteins from the endoplasmic reticulum; ERV15 has a paralog, ERV14, that arose from the whole genome duplication	0.985232	1.07283	1.12316	1.03338	1.05699	1.10657	1.01811	0.926037	0.596549	0.266812	0.867843	0.699389	0.416403	0.906663	no
YBR211C	AME1	Essential kinetochore protein associated with microtubules and SPBs; component of the kinetochore sub-complex COMA (Ctf19p, Okp1p, Mcm21p, Ame1p); involved in spindle checkpoint maintenance; orthologous to human centromere constitutive-associated network (CCAN) subunit CENP-U and fission yeast Mis17; relative distribution to the nucleus increases upon DNA replication stress	0.999255	1.21669	0.846976	0.99104	1.21578	0.846345	0.990301	0.998764	0.210444	0.276809	0.97796	0.243621	0.345533	0.964503	no
YBR212W	NGR1	RNA binding protein that negatively regulates growth rate; interacts with the 3' UTR of the mitochondrial porin (POR1) mRNA and enhances its degradation; overexpression impairs mitochondrial function; interacts with Dhh1p to mediate POR1 mRNA decay; expressed in stationary phase	1.07174	0.952643	1.65666	1.24506	1.02099	1.77551	1.33438	0.429038	0.622179	3.69514e-17	0.0016975	0.867841	5.9955e-21	7.97729e-06	no
YBR213W	MET8	Bifunctional dehydrogenase and ferrochelatase; involved in the biosynthesis of siroheme, a prosthetic group used by sulfite reductase; required for sulfate assimilation and methionine biosynthesis	1.23258	0.757106	0.879865	0.915832	0.933194	1.0845	1.12884	0.0777482	0.0120489	0.287162	0.629524	0.678186	0.609919	0.362376	no
YBR214W	SDS24	Protein involved in cell separation during budding; one of two S, cerevisiae homologs (Sds23p and Sds24p) of the S, pombe Sds23 protein, which is implicated in APC/cyclosome regulation; may play an indirect role in fluid-phase endocytosis; protein abundance increases in response to DNA replication stress; SDS24 has a paralog, SDS23, that arose from the whole genome duplication	0.657885	1.38593	1.07252	0.69285	0.911782	0.705595	0.455816	0.0228629	0.0946439	0.765442	0.079514	0.731851	0.0875956	2.25351e-06	Gcn4
YBR215W	HPC2	Subunit of the HIR complex; HIR is a nucleosome assembly complex involved in regulation of histone gene transcription; mutants display synthetic defects with subunits of FACT, a complex that allows passage of RNA Pol II through nucleosomes	1.00821	0.995396	1.04573	0.962621	1.00357	1.05431	0.970526	0.960994	0.981383	0.709755	0.841305	0.985316	0.708416	0.832978	no
YBR216C	YBP1	Protein involved in cellular response to oxidative stress; required for oxidation of specific cysteine residues of transcription factor Yap1p, resulting in nuclear localization of Yap1p in response to stress; YBP1 has a paralog, YBP2, that arose from the whole genome duplication	0.991518	1.03454	1.06558	0.960836	1.02576	1.05654	0.952687	0.951061	0.787026	0.497858	0.795881	0.85597	0.634187	0.662359	no
YBR217W	ATG12	Ubiquitin-like modifier involved in autophagy and the Cvt pathway; conserved; conjugated to Atg5p to form a complex involved in Atg8p lipidation; Atg5p-Atg12p conjugate enhances E2 activity of Atg3p by rearranging its catalytic site, also forms a complex with Atg16p; the Atg5-Atg12/Atg16 complex binds to membranes and is essential for autophagosome formation	0.871839	1.16478	1.31511	1.16232	1.0155	1.14657	1.01335	0.461468	0.41666	0.0661887	0.500085	0.960698	0.481091	0.95543	no
YBR218C	PYC2	Pyruvate carboxylase isoform; cytoplasmic enzyme that converts pyruvate to oxaloacetate; differentially regulated than isoform Pyc1p; mutations in the human homolog are associated with lactic acidosis; PYC2 has a paralog, PYC1, that arose from the whole genome duplication	2.7407	0.403892	0.468288	1.47129	1.10695	1.28344	4.03236	2.11107e-24	4.12481e-20	4.47103e-14	0.000616849	0.51564	0.0486509	2.40694e-47	Gcn4
YBR219C	NA	Putative protein of unknown function; YBR219C is not an essential gene	1	4.07137	1	4.7818	3.21465	1	3.77558	NA	NA	NA	NA	NA	NA	NA	no
YBR220C	NA	Putative protein of unknown function; YBR220C is not an essential gene	1.04529	0.910227	0.926835	0.989729	0.95145	0.968811	1.03455	0.67507	0.313119	0.380042	0.955819	0.658065	0.79636	0.760866	no
YBR221C	PDB1	E1 beta subunit of the pyruvate dehydrogenase (PDH) complex; PDH is an evolutionarily conserved multi-protein complex found in mitochondria	1.00484	0.88686	0.982378	1.10643	0.891148	0.987128	1.11178	0.972847	0.174238	0.869793	0.342473	0.218011	0.927514	0.227111	no
YBR221W-A	NA	Putative protein of unknown function; identified by expression profiling and mass spectrometry	0.433391	1.47954	0.273242	0.292399	0.641219	0.118421	0.126723	NA	NA	NA	NA	NA	NA	NA	no
YBR222C	PCS60	Oxalyl-CoA synthetase; capable of catalyzing conversion of oxalate to oxalyl-CoA; catalyzes first step in pathway of oxalate degradation that functions to protect yeast from inhibitory effects of oxalate; peroxisomal protein that binds mRNA; localizes to both peroxisomal peripheral membrane and matrix, expression is highly inducible by oleic acid; similar to E, coli long chain acyl-CoA synthetase	0.961632	0.873171	0.804919	0.82146	0.839668	0.774036	0.789942	0.750706	0.166113	0.0096768	0.0392973	0.0718682	0.00491492	0.00580121	no
YBR223C	TDP1	Tyrosyl-DNA phosphodiesterase I; hydrolyzes 3' and 5'-phosphotyrosyl bonds; involved in the repair of DNA lesions created by topo I and topo II; mutations in the human homolog, TDP1, result in the a neurodegenerative disease, spinocerebellar ataxia with axonal neuropathy (SCAN1); yeast cells and human rhabdomyosarcoma lines that overexpress TDP1 both exhibit elevated dosage chromosomal instabilit…	0.993972	0.831494	0.816076	0.804507	0.826481	0.811156	0.799658	0.985649	0.447394	0.333532	0.424085	0.451661	0.389779	0.31842	Gcn4
YBR223W-A	NA	Dubious open reading frame; unlikely to encode a functional protein, based on available experimental and comparative sequence data; completely overlaps YBR223C; identified by gene-trapping, microarray-based expression analysis, and genome-wide homology searching	NA	NA	NA	NA	NA	NA	NA	NA	NA	NA	NA	NA	NA	NA	no
YBR224W	NA	Dubious open reading frame; unlikely to encode a functional protein, based on available experimental and comparative sequence data; partially overlaps the verified gene TDP1	NA	NA	NA	NA	NA	NA	NA	NA	NA	NA	NA	NA	NA	NA	no
YBR225W	NA	Putative protein of unknown function; non-essential gene identified in a screen for mutants affected in mannosylphophorylation of cell wall components	0.964497	0.921405	0.945995	0.763824	0.888692	0.912409	0.736705	0.838442	0.621507	0.712092	0.0426569	0.456734	0.580042	0.0118209	no
YBR226C	NA	Dubious open reading frame; unlikely to encode a functional protein, based on available experimental and comparative sequence data; partially overlaps the uncharacterized ORF YBR225W	0.271498	0.612547	1.60886	1.63045	0.166305	0.436804	0.442664	NA	0.819285	0.757917	NA	NA	0.582361	0.556462	no
YBR227C	MCX1	Non-proteolytic ATPase of the AAA family; stimulates incorporation of the pyridoxal phosphate cofactor into Hem1p (5-aminolevulinic acid synthase); localized to the mitochondrial matrix; ortholog of vertebrate CLPX, which promotes erythropoiesis	1.27362	0.778231	0.724386	1.24437	0.991172	0.922594	1.58486	0.00117608	0.000578917	4.4049e-06	0.00403434	0.956363	0.435269	1.01452e-11	no
YBR228W	SLX1	Endonuclease involved in DNA recombination and repair; subunit of a complex, with Slx4p, that hydrolyzes 5' branches from duplex DNA in response to stalled or converging replication forks; function overlaps with that of Sgs1p-Top3p	1.16158	0.938084	1.21158	1.18881	1.08966	1.40735	1.38091	0.243756	0.693144	0.0817692	0.200432	0.592241	0.00279326	0.00266018	Gcn4
YBR229C	ROT2	Glucosidase II catalytic subunit; required to trim the final glucose in N-linked glycans; required for normal cell wall synthesis; mutations in rot2 suppress tor2 mutations, and are synthetically lethal with rot1 mutations	1.34882	0.722649	0.91011	1.49612	0.974726	1.22758	2.018	0.00206633	0.000568212	0.400476	1.5164e-05	0.888741	0.0687929	2.78409e-16	Gcn4
YBR230C	OM14	Mitochondrial outer membrane receptor for cytosolic ribosomes; integral protein of the outer membrane that interacts with the nascent chain-associated complex (NAC) bound to ribosomes, contributing to co-translational mitochondrial import; interacts with porin (Por1p) and Om45p; abundance is decreased in cells grown in glucose relative to other carbon sources	1.2217	0.817369	0.983994	1.15774	0.998583	1.20215	1.41441	0.372748	0.37619	0.954161	0.631039	0.99657	0.443317	0.0735874	no
YBR230W-A	NA	Putative protein of unknown function; YBR230W-A has a paralog, COQ8, that arose from the whole genome duplication	0.869294	0.65114	0.933534	0.900265	0.566033	0.811516	0.782595	0.698544	0.146032	0.846578	0.841305	0.0481282	0.561561	0.442946	no
YBR231C	SWC5	Component of the SWR1 complex; complex exchanges histone variant H2AZ (Htz1p) for chromatin-bound histone H2A; protein abundance increases in response to DNA replication stress; relocalizes to the cytosol in response to hypoxia	0.893787	1.01572	1.17886	0.925093	0.90784	1.05365	0.826836	0.233801	0.910416	0.0424648	0.546295	0.358949	0.659179	0.0241129	no
YBR232C	NA	Dubious open reading frame; unlikely to encode a functional protein, based on available experimental and comparative sequence data	0.212464	2.40281	1	1	0.510511	0.24171	0.258656	NA	NA	NA	NA	NA	NA	NA	no
YBR233W	PBP2	RNA binding protein; has similarity to mammalian heterogeneous nuclear RNP K protein, involved in the regulation of telomere position effect and telomere length; relative distribution to the nucleus increases upon DNA replication stress	0.81522	1.07276	1.12028	1.13535	0.874534	0.913274	0.925562	0.0674125	0.638151	0.331509	0.39205	0.31089	0.518576	0.565795	no
YBR233W-A	DAD3	Essential subunit of the Dam1 complex (aka DASH complex); complex couples kinetochores to the force produced by MT depolymerization thereby aiding in chromosome segregation; is transferred to the kinetochore prior to mitosis	0.949402	1.18259	0.956341	1.0093	1.12276	0.907953	0.958236	0.826313	0.399534	0.836975	0.979704	0.612946	0.681937	0.862799	no
YBR234C	ARC40	Subunit of the ARP2/3 complex; ARP2/3 is required for the motility and integrity of cortical actin patches	0.775444	0.929017	1.48843	1.15561	0.720401	1.1542	0.896111	2.78348e-08	0.217848	5.52206e-20	0.00569776	4.81859e-13	0.00593225	0.0343673	no
YBR235W	VHC1	Vacuolar membrane cation-chloride cotransporter (CCC); likely mediates K+ and Cl- cotransport into the vacuole; has a role in potassium homeostasis and salt tolerance; localizes to sites of contact between the vacuole and mitochondria (vCLAMPs); similar to mammalian electroneutral Na(+)-(K+)-C1- cotransporter family	0.966329	1.03464	0.970279	1.1196	0.9998	0.937609	1.0819	0.760883	0.777432	0.765195	0.261714	0.998753	0.551345	0.404213	no
YBR236C	ABD1	Methyltransferase; catalyzes the transfer of a methyl group from S-adenosylmethionine to the GpppN terminus of capped mRNA; nuclear protein that relocalizes to the cytosol in response to hypoxia	0.810458	1.17366	1.10486	1.0542	0.9512	0.895439	0.854382	0.000338637	0.00867063	0.119558	0.60174	0.557424	0.119716	0.0106508	no
YBR237W	PRP5	RNA helicase in the DEAD-box family; necessary for prespliceosome formation, bridges U1 and U2 snRNPs and enables stable U2 snRNP association with intron RNA	1.06645	0.97511	1.10988	1.09027	1.03991	1.18363	1.16271	0.654071	0.885045	0.368972	0.612137	0.824397	0.174814	0.202518	no
YBR238C	NA	Mitochondrial membrane protein; not required for respiratory growth but causes a synthetic respiratory defect in combination with rmd9 mutations; transcriptionally up-regulated by TOR; deletion increases life span; YBR238C has a paralog, RMD9, that arose from the whole genome duplication	1.18268	0.985952	1.56302	1.18435	1.16606	1.84855	1.40071	0.214885	0.946247	3.88867e-05	0.275587	0.295839	2.42108e-08	0.00335844	no
YBR239C	ERT1	Transcriptional regulator; involved in regulation of gluconeogenesis and fermentable carbon utilization; GFP-fusion protein localizes to cytoplasm, nucleus; null mutation affects periodicity of transcriptional and metabolic oscillation; plays role in restricting Ty1 transposition; member of the zinc cluster family of proteins, similar to Rds2p	1.2794	0.923553	0.921553	1.18988	1.1816	1.17904	1.52233	0.0148946	0.550123	0.477432	0.130076	0.160846	0.167556	4.49155e-06	no
YBR240C	THI2	Transcriptional activator of thiamine biosynthetic genes; interacts with regulatory factor Thi3p to control expression of thiamine biosynthetic genes with respect to thiamine availability; acts together with Pdc2p to respond to thiaminediphosphate demand, possibly as related to carbon source availability; zinc finger protein of the Zn(II)2Cys6 type	1.39254	0.932774	0.672987	0.732183	1.29893	0.937163	1.0196	0.198566	0.847216	0.0881118	0.302285	0.379672	0.871338	0.959389	no
YBR241C	NA	Putative transporter, member of the sugar porter family; green fluorescent protein (GFP)-fusion protein localizes to the vacuolar membrane; YBR241C is not an essential gene; YBR241C has a paralog, VPS73, that arose from the whole genome duplication	0.977562	0.855663	0.98373	1.0817	0.836464	0.961657	1.05742	0.90755	0.284995	0.922569	0.714578	0.234864	0.843587	0.74633	Gcn4
YBR242W	NA	Putative protein of unknown function; green fluorescent protein (GFP)-fusion protein localizes to the cytoplasm and nucleus; YBR242W is not an essential gene; YBR242W has a paralog, YGL101W, that arose from the whole genome duplication	0.881993	1.14445	1.15341	1.0499	1.0094	1.0173	0.926007	0.10165	0.0733549	0.0423096	0.69574	0.946363	0.886094	0.358966	no
YBR243C	ALG7	UDP-N-acetyl-glucosamine-1-P transferase; transfers Glc-Nac-P from UDP-GlcNac to Dol-P in the ER in the first step of the dolichol pathway of protein asparagine-linked glycosylation; inhibited by tunicamycin; human homolog DPAGT1 can complement yeast ALG7 mutant	0.962263	1.2284	1.14742	0.979125	1.18205	1.10412	0.942176	0.698544	0.00256525	0.0532127	0.888283	0.0286143	0.255771	0.509882	no
YBR244W	GPX2	Phospholipid hydroperoxide glutathione peroxidase; protects cells from phospholipid hydroperoxides and nonphospholipid peroxides during oxidative stress; induced by glucose starvation; protein abundance increases in response to DNA replication stress	0.712485	1.44024	1.60314	0.926438	1.02615	1.14221	0.660073	0.0458743	0.0273967	0.00195964	0.809843	0.935408	0.543971	0.00967862	no
YBR245C	ISW1	ATPase subunit of imitation-switch (ISWI) class chromatin remodelers; with Ioc3p forms Isw1a complex involved in repression of transcription initiation; with Ioc2p and Ioc4p forms Isw1b complex involved in regulation of transcription elongation; Isw1b recruited to ORFs by H3K36 methylation and acts with Chd1p to prevent trans-histone exchange over coding regions; Isw1p import into nucleus depends…	0.999451	0.957918	0.924948	1.01465	0.957392	0.92444	1.01409	0.997644	0.660929	0.297789	0.921276	0.658065	0.362479	0.896841	no
YBR246W	RRT2	Methylesterase performing penultimate step of diphthamide biosynthesis; hydrolyzes methylated diphthine to produce diphthine and allows Dph6-catalyzed amidation reaction to occur; deletion leads to resistance to sordarin and accumulation of methylatediphthine; WD40 domain-containing protein; involved in endosomal recycling; forms complex with Rtt10p that functions in retromer-mediated pathway for…	1.03401	1.08273	1.14745	0.961276	1.11955	1.18647	0.993966	0.762972	0.408953	0.0758957	0.786436	0.22468	0.0430046	0.961363	no
YBR247C	ENP1	Protein associated with U3 and U14 snoRNAs; required for pre-rRNA processing and 40S ribosomal subunit synthesis; localized in the nucleus and concentrated in the nucleolus; human BYSL functionally complements the heat sensitivity of an enp1 ts mutant	1.06999	0.990807	1.07677	0.943358	1.06015	1.15213	1.00938	0.534215	0.950623	0.44864	0.694776	0.630002	0.152655	0.944591	no
YBR248C	HIS7	Imidazole glycerol phosphate synthase; glutamine amidotransferase:cyclase that catalyzes the fifth step of histidine biosynthesis and also produces 5-aminoimidazole-4-carboxamide ribotide (AICAR), a purine precursor	1.82811	0.451952	0.60639	1.58109	0.826217	1.10855	2.89041	3.80124e-11	4.16204e-19	5.32614e-08	1.96097e-06	0.104518	0.443084	2.14378e-34	Gcn4
YBR249C	ARO4	3-deoxy-D-arabino-heptulosonate-7-phosphate (DAHP) synthase; catalyzes the first step in aromatic amino acid biosynthesis and is feedback-inhibited by tyrosine or high concentrations of phenylalanine or tryptophan; relative distribution to the nucleus increases upon DNA replication stress	2.33148	0.384676	0.483599	1.47419	0.896863	1.1275	3.43705	2.22098e-21	3.26163e-27	8.30696e-16	9.78421e-05	0.415903	0.353925	7.55624e-46	Gcn4
YBR250W	SPO23	Protein of unknown function; associates with meiosis-specific protein Spo1p	1.20021	0.889156	1.75056	1.18714	1.06717	2.10104	1.42482	0.558329	0.74401	0.00967526	0.662123	0.881264	0.00190076	0.180374	no
YBR251W	MRPS5	Mitochondrial ribosomal protein of the small subunit	1.17288	0.661994	0.684643	0.745925	0.776438	0.803003	0.874879	0.244569	0.000225029	0.000685986	0.0212387	0.0558369	0.111682	0.342083	no
YBR252W	DUT1	Deoxyuridine triphosphate diphosphatase (dUTPase); catalyzes hydrolysis of dUTP to dUMP and PPi, thereby preventing incorporation of uracil into DNA during replication; critical for the maintenance of genetic stability; also has diphosphatase activity on deoxyinosine triphosphate; human homolog DUT allows growth of yeast haploid dut1 null mutant after sporulation of heterozygous diploid	1.0313	1.01711	1.08981	1.00547	1.04895	1.12392	1.03694	0.700586	0.856894	0.150735	0.968685	0.55013	0.0718115	0.641434	no
YBR253W	SRB6	Subunit of the RNA polymerase II mediator complex; associates with core polymerase subunits to form the RNA polymerase II holoenzyme; essential for transcriptional regulation	0.946169	0.925524	1.017	1.18313	0.875702	0.962257	1.11944	0.682258	0.564579	0.901069	0.149237	0.281402	0.805355	0.323471	no
YBR254C	TRS20	Core component of transport protein particle (TRAPP) complexes I-III; TRAPPs are multimeric guanine nucleotide-exchange factors for GTPase Ypt1p, regulating ER-Golgi traffic (TRAPPI), intra-Golgi traffic (TRAPPII), endosome-Golgi traffic (TRAPPII and III) and autophagy (TRAPPIII); mutation leads to defects in endocytic recycling, block in sporulation/meiosis; mutations in human homolog TRAPPC2 ca…	0.967438	1.11591	1.21056	1.09773	1.07958	1.17114	1.06198	0.784429	0.257793	0.0157754	0.432775	0.500081	0.093399	0.578291	no
YBR255C-A	RCF3	Putative protein of unknown function; may interact with respiratory chain complexes III (ubiquinol-cytochrome c reductase) or IV (cytochrome c oxidase); identified by sequence comparison with hemiascomycetous yeast species	1.01729	0.915705	0.779171	0.793727	0.931539	0.792645	0.807452	0.933373	0.601633	0.0418501	0.107813	0.696225	0.102156	0.111872	no
YBR255W	MTC4	Protein of unknown function; required for normal growth rate at 15 degrees C; green fluorescent protein (GFP)-fusion protein localizes to the cytoplasm in a punctate pattern; mtc4 is synthetically sick with cdc13-1	1.11701	0.881749	0.895176	1.24597	0.984921	0.99992	1.39176	0.26732	0.19654	0.223337	0.0102937	0.929589	0.999727	2.57716e-05	Gcn4
YBR256C	RIB5	Riboflavin synthase; catalyzes the last step of the riboflavin biosynthesis pathway	3.13959	0.28593	0.413359	1.65242	0.897704	1.29778	5.18794	7.5245e-21	5.13487e-25	1.09609e-12	0.000254279	0.59206	0.108064	1.43383e-43	Gcn4
YBR257W	POP4	Subunit of both RNase MRP and nuclear RNase P; RNase MRP cleaves pre-rRNA, while nuclear RNase P cleaves tRNA precursors to generate mature 5' ends and facilitates turnover of nuclear RNAs; binds to the RPR1 RNA subunit in RNase P	1.08496	1.07156	1.20147	1.02723	1.1626	1.30356	1.11451	0.484881	0.578294	0.0405308	0.888484	0.170017	0.00595995	0.320027	no
YBR258C	SHG1	Subunit of the COMPASS (Set1C) complex; COMPASS methylates histone H3 on lysine 4 and is required in transcriptional silencing near telomeres	1.06698	0.979528	1.3538	0.88388	1.04513	1.44448	0.943079	0.770046	0.936203	0.0390341	0.631039	0.872175	0.0247942	0.79876	no
YBR259W	NA	Protein of unknown function; YBR259W is not an essential gene; forms cytoplasmic foci upon DNA replication stress	0.980343	1.04578	1.07376	1.01289	1.02522	1.05266	0.992976	0.899959	0.767842	0.542777	0.957224	0.890612	0.733259	0.964503	no
YBR260C	RGD1	GTPase-activating protein (RhoGAP) for Rho3p and Rho4p; possibly involved in control of actin cytoskeleton organization	0.891737	0.920697	0.997517	1.04042	0.821019	0.889523	0.927782	0.145363	0.352164	0.980244	0.768343	0.00901164	0.166895	0.382907	no
YBR261C	TAE1	AdoMet-dependent proline methyltransferase; catalyzes the dimethylation of ribosomal proteins Rpl12 and Rps25 at N-terminal proline residues; has a role in protein synthesis; fusion protein localizes to the cytoplasm	0.828618	1.12924	1.25299	1.08754	0.935707	1.03825	0.901158	0.00601836	0.108319	0.000450555	0.387658	0.470338	0.714321	0.173481	no
YBR262C	MIC12	Component of the MICOS complex; MICOS (formerly MINOS or MitOS) is a mitochondrial inner membrane complex that extends into the intermembrane space and has a role in the maintenance of crista junctions, inner membrane architecture, and formation of contact sites to the outer membrane; forms a subcomplex with Mic10p and Mic27p whose assembly and stability requires cardiolipin	1.46506	0.625143	0.478838	0.957638	0.915874	0.701528	1.403	0.00624867	0.000399977	6.13722e-09	0.882004	0.669826	0.0213169	0.0165679	no
YBR263W	SHM1	Mitochondrial serine hydroxymethyltransferase; converts serine to glycine plus 5,10 methylenetetrahydrofolate; involved in generating precursors for purine, pyrimidine, amino acid, and lipid biosynthesis; reverse reaction generates serine	1.22024	0.773982	0.882629	1.22339	0.944444	1.07702	1.49283	0.0144972	0.000819615	0.137697	0.0180871	0.621684	0.486508	2.68746e-08	no
YBR264C	YPT10	Rab family GTP-binding protein; contains the PEST signal sequence specific for proteolytic enzymes; may be involved in vesicular transport; overexpression leads to accumulation of Golgi-like cisternae with budding vesicles	1.13603	0.983569	0.900385	0.894186	1.11736	1.02286	1.01582	0.366424	0.931122	0.4274	0.529178	0.480567	0.913713	0.932796	no
YBR265W	TSC10	3-ketosphinganine reductase; catalyzes the second step in phytosphingosine synthesis; essential for growth in the absence of exogenous dihydrosphingosine or phytosphingosine; localized to lipid droplets; member of short chain dehydrogenase/reductase protein family	1.03683	1.08883	1.03002	0.994699	1.12894	1.06796	1.03134	0.689227	0.264886	0.720168	0.971884	0.103487	0.441526	0.740935	no
YBR266C	SLM6	Protein with a potential role in actin cytoskeleton organization; gene exhibits synthetic genetic interaction with MSS4 encoding phosphatidylinositol 4-phosphate kinase	NA	NA	NA	NA	NA	NA	NA	NA	NA	NA	NA	NA	NA	NA	no
YBR267W	REI1	Cytoplasmic pre-60S factor; required for the correct recycling of shuttling factors Alb1, Arx1 and Tif6 at the end of the ribosomal large subunit biogenesis; involved in bud growth in the mitotic signaling network	1.0496	1.04157	1.18416	1.0288	1.09324	1.2429	1.07984	0.653191	0.731274	0.0292684	0.861027	0.380392	0.00910427	0.423741	no
YBR268W	MRPL37	Mitochondrial ribosomal protein of the large subunit	1.15032	0.804762	0.869676	0.785834	0.92573	1.0004	0.903958	0.121985	0.0078905	0.0988374	0.00449636	0.497118	0.998695	0.297878	no
YBR269C	SDH8	Protein required for assembly of succinate dehydrogenase; interacts with flavinylated Sdh1p and may function as a chaperone for free Sdh1p, protecting its FAD cofactor from redox reactions before assembly of the complex; soluble protein of the mitochondrial matrix; respiratory defect of null mutant is functionally complemented by Drosophila and human orthologs	0.933969	0.909144	0.861144	0.935791	0.849112	0.804281	0.873999	0.526517	0.363671	0.0851591	0.642708	0.0908287	0.0178611	0.150179	Gcn4
YBR270C	BIT2	Subunit of TORC2 membrane-associated complex; involved in regulation of actin cytoskeletal dynamics during polarized growth and cell wall integrity; interacts with Slm1p and Slm2p, homologous PH domain-containing TORC2 substrates; BIT2 has a paralog, BIT61, that arose from the whole genome duplication	1.19545	0.994041	1.21527	0.968091	1.18833	1.4528	1.15731	0.119645	0.97619	0.0496855	0.878499	0.169539	0.000348023	0.226776	no
YBR271W	EFM2	S-adenosylmethionine-dependent methyltransferase; seven-beta-strand lysine methyltransferase which dimethylates translation elongation factor EF2 (Eft1p and Eft2p) at lysine 613 and methylates EF3 (Yef3p) at lysine 187; green fluorescent protein (GFP)-fusion protein localizes to the cytoplasm; involved in regulation of translational termination; predicted involvement in ribosome biogenesis	1.04768	1.06753	1.17656	1.01207	1.11843	1.23266	1.06033	0.716211	0.603052	0.0776109	0.956694	0.330215	0.03516	0.6304	no
YBR272C	HSM3	Evolutionarily conserved 19S regulatory particle assembly-chaperone; involved in the assembly of the base subcomplex of the 19S proteasomal regulatory particle (RP); involved in DNA mismatch repair during slow growth; weak similarity to Msh1p; structural study suggests Hsm3p is a scaffold protein for Rpt1p-Rpt2p complex formation; ortholog of human 19S subunit S5b	1.00605	1.00743	1.17221	1.02837	1.01352	1.1793	1.03459	0.971546	0.965224	0.0929495	0.886921	0.942782	0.130747	0.808096	no
YBR273C	UBX7	UBX (ubiquitin regulatory X) domain-containing protein; interacts with Cdc48p; UBX7 has a paralog, UBX6, that arose from the whole genome duplication	0.871564	1.02814	1.12491	1.07221	0.896091	0.980435	0.934502	0.0557133	0.797791	0.0905438	0.495586	0.174678	0.859348	0.413194	no
YBR274W	CHK1	Serine/threonine kinase and DNA damage checkpoint effector; mediates cell cycle arrest via phosphorylation of Pds1p; phosphorylated by checkpoint signal transducer Mec1p; homolog of S, pombe and mammalian Chk1 checkpoint kinase	0.822483	1.21605	1.22648	1.16909	1.00018	1.00875	0.961556	0.0182037	0.0167365	0.00881133	0.0970385	0.998765	0.955236	0.732142	no
YBR275C	RIF1	Protein that binds to the Rap1p C-terminus; acts synergistically with Rif2p to help control telomere length and establish telomeric silencing; involved in control of DNA replication; contributes to resection of DNA double strand breaks (DSBs); deletion results in telomere elongation	0.993948	0.832671	0.813833	1.12082	0.827632	0.808908	1.11404	0.958697	0.00655621	0.0013515	0.158991	0.0082967	0.00300636	0.144995	no
YBR276C	PPS1	Protein phosphatase; has specificity for serine, threonine, and tyrosine residues; has a role in the DNA synthesis phase of the cell cycle	0.944194	0.95251	0.868526	0.994603	0.899354	0.820057	0.939098	0.494851	0.596549	0.0334899	0.971999	0.181463	0.00473901	0.442531	no
YBR277C	NA	Dubious open reading frame; unlikely to encode a functional protein, based on available experimental and comparative sequence data; partially overlaps the verified gene YBR278W	1	1	2.21583	1	1	1.74956	1	NA	NA	NA	NA	NA	NA	NA	no
YBR278W	DPB3	Third-largest subunit of DNA polymerase II (DNA polymerase epsilon); required to maintain fidelity of chromosomal replication and also for inheritance of telomeric silencing; stabilizes the interaction of Pol epsilon with primer-template DNA, positively affecting the processivity of the polymerase and exonuclease activities of Pol epsilon; mRNA abundance peaks at the G1/S boundary of the cell cyc…	0.887516	1.2051	1.5648	1.00737	1.06955	1.38879	0.894053	0.673861	0.485582	0.0210019	0.98699	0.848333	0.163864	0.70103	no
YBR279W	PAF1	Component of the Paf1p complex involved in transcription elongation; binds to and modulates the activity of RNA polymerases I and II; required for expression of a subset of genes, including cell cycle-regulated genes; involved in SER3 repression by helping to maintain SRG1 transcription-dependent nucleosome occupancy; homolog of human PD2/hPAF1	0.918407	1.03527	1.05678	0.977105	0.950798	0.97055	0.89738	0.301511	0.74389	0.500535	0.872706	0.616898	0.783053	0.164938	no
YBR280C	SAF1	F-Box protein involved in proteasome-dependent degradation of Aah1p; involved in proteasome-dependent degradation of Aah1p during entry of cells into quiescence; interacts with Skp1	0.842324	1.06164	0.943514	1.12897	0.894247	0.794745	0.95096	0.273357	0.77347	0.736996	0.567698	0.546594	0.146012	0.796021	Gcn4
YBR281C	DUG2	Component of glutamine amidotransferase (GATase II); forms a complex with Dug3p to degrade glutathione (GSH) and other peptides containing a gamma-glu-X bond in an alternative pathway to GSH degradation by gamma-glutamyl transpeptidase (Ecm38p)	0.867103	1.25122	0.889722	0.893801	1.08494	0.771481	0.775017	0.0702529	0.00140136	0.133808	0.246195	0.389477	0.000610184	0.000326268	no
YBR282W	MRPL27	Mitochondrial ribosomal protein of the large subunit; homolog of human Bcl-2 interacting protein BMRP	0.97001	0.795902	0.966437	0.74527	0.772034	0.937454	0.72292	0.850089	0.037746	0.807386	0.00757769	0.0221018	0.675079	0.00155226	no
YBR283C	SSH1	Subunit of the Ssh1 translocon complex; Sec61p homolog involved in co-translational pathway of protein translocation; not essential	0.897354	1.06154	1.0624	1.06669	0.952575	0.953348	0.957194	0.052772	0.362264	0.302544	0.386754	0.49916	0.496377	0.509895	no
YBR284W	NA	Putative metallo-dependent hydrolase superfamily protein; similar to AMP deaminases but lacks key catalytic residues and does not rescue purine nucleotide metabolic defect of quadruple aah1 ade8 amd1 his1 mutant; null mutant exhibits longer telomeres, altered Ty mobility, decreased resistance to rapamycin and wortmannin; induced in response to hydrostatic pressure; not an essential gene; YBR284W …	0.560453	1.00597	1.43352	0.805148	0.563797	0.803421	0.451248	7.34084e-05	0.9881	0.0191229	0.348766	0.000196699	0.234266	5.91457e-08	no
YBR285W	NA	Putative protein of unknown function; YBR285W is not an essential gene	1.23362	0.884693	2.01698	0.656971	1.09137	2.48818	0.81045	0.643973	0.816245	0.01655	0.384815	0.888741	0.00645837	0.669933	Gcn4
YBR286W	APE3	Vacuolar aminopeptidase Y; processed to mature form by Prb1p	1.30944	0.987876	0.821329	1.12158	1.29357	1.07549	1.46864	2.79682e-06	0.909777	0.000763474	0.115052	1.24828e-05	0.35625	2.31533e-12	no
YBR287W	NA	Protein of unknown function; green fluorescent protein (GFP)-fusion protein localizes to the ER; YBR287W is not an essential gene	0.920766	1.28618	1.09197	0.865494	1.18427	1.00545	0.796917	0.558663	0.0213299	0.489257	0.327963	0.184791	0.978813	0.0432503	no
YBR288C	APM3	Mu3-like subunit of the clathrin associated protein complex (AP-3); functions in transport of alkaline phosphatase to the vacuole via the alternate pathway	0.884371	1.11305	1.21745	1.00537	0.98435	1.07668	0.88912	0.0795696	0.140954	0.00121642	0.971999	0.896471	0.367547	0.0969114	no
YBR289W	SNF5	Subunit of the SWI/SNF chromatin remodeling complex; involved in transcriptional regulation; functions interdependently in transcriptional activation with Snf2p and Snf6p; relocates to the cytosol under hypoxic conditions	0.976121	0.920084	1.00306	0.99263	0.898113	0.97911	0.968927	0.871594	0.515307	0.9817	0.973467	0.393183	0.900741	0.825472	no
YBR290W	BSD2	Heavy metal ion homeostasis protein; facilitates trafficking of Smf1p and Smf2p metal transporters to vacuole where they are degraded; acts as an adaptor protein with Rsp5p in the regulated endocytosis of Smf1p and is itself ubiquitylated by Rsp5p; controls metal ion transport, prevents metal hyperaccumulation, functions in copper detoxification	0.892401	1.07815	1.09774	0.971059	0.962145	0.979622	0.866574	0.312095	0.558136	0.38168	0.882399	0.799796	0.901729	0.174359	no
YBR291C	CTP1	Mitochondrial inner membrane citrate transporter; member of the mitochondrial carrier family	1.35713	0.583364	1.27329	1.30531	0.791702	1.72803	1.77147	0.314677	0.0426406	0.405595	0.481709	0.498591	0.0526072	0.0267414	no
YBR292C	NA	Dubious open reading frame; unlikely to encode a functional protein, based on available experimental and comparative sequence data; YBR292C is not an essential gene	0.891817	0.92456	0.876888	1.086	0.824538	0.782024	0.968514	0.848576	0.907629	0.801198	0.923086	0.745717	0.669092	0.959372	no
YBR293W	VBA2	Permease of basic amino acids in the vacuolar membrane	1.05073	0.895912	1.28812	1.18349	0.941361	1.35347	1.24353	0.660743	0.259684	0.000742323	0.0644225	0.616547	0.000199666	0.00714514	no
YBR294W	SUL1	High affinity sulfate permease of the SulP anion transporter family; sulfate uptake is mediated by specific sulfate transporters Sul1p and Sul2p, which control the concentration of endogenous activated sulfate intermediates	1.37876	0.946782	1.01068	1.41149	1.30539	1.39348	1.94611	0.0144693	0.784306	0.955092	0.00794413	0.0675466	0.017899	7.44218e-09	no
YBR295W	PCA1	Cadmium transporting P-type ATPase; may also have a role in copper and iron homeostasis; stabilized by Cd binding, which prevents ubiquitination; S288C and other lab strains contain a G970R mutation which eliminates Cd transport function	0.928022	1.1155	0.933847	1.01354	1.03521	0.866631	0.940587	0.710892	0.57483	0.709755	0.969165	0.896471	0.447033	0.768128	no
YBR296C	PHO89	Plasma membrane Na+/Pi cotransporter; active in early growth phase; similar to phosphate transporters of Neurospora crassa; transcription regulated by inorganic phosphate concentrations and Pho4p; mutations in related human transporter genes hPit1 and hPit2 are associated with hyperphosphatemia-induced calcification of vascular tissue and familial idiopathic basal ganglia calcification	1.95595	3.9638	0.698936	0.256892	7.753	1.36709	0.502469	0.310235	0.0129627	0.598793	0.0234812	0.000126946	0.705045	0.283075	no
YBR296C-A	NA	Putative protein of unknown function; identified by gene-trapping, microarray-based expression analysis, and genome-wide homology searching	1.52243	1.39544	1.13102	2.18794	2.12445	1.7219	3.33098	0.513946	0.614933	0.850205	0.169602	0.203661	0.394829	0.0137836	no
YBR297W	MAL33	MAL-activator protein; part of complex locus MAL3; nonfunctional in genomic reference strain S288C	1.10372	0.982464	0.937153	1.53625	1.08436	1.03435	1.69559	0.597115	0.942017	0.715438	0.00182319	0.695964	0.887876	3.96071e-05	no
YBR298C	MAL31	Maltose permease; high-affinity maltose transporter (alpha-glucoside transporter); encoded in the MAL3 complex locus; member of the 12 transmembrane domain superfamily of sugar transporters; functional in genomic reference strain S288C	1.00359	1.08614	1.53961	0.936192	1.09004	1.54513	0.939554	0.988567	0.665114	0.000353464	0.79798	0.655497	0.00116258	0.746734	no
YBR298C-A	NA	Putative protein of unknown function; identified by gene-trapping, microarray-based expression analysis, and genome-wide homology searching	0.580766	0.229868	0.731287	1.97465	0.133499	0.424707	1.14681	NA	NA	NA	NA	NA	NA	NA	no
YBR299W	MAL32	Maltase (alpha-D-glucosidase); inducible protein involved in maltose catabolism; encoded in the MAL3 complex locus; functional in genomic reference strain S288C; hydrolyzes the disaccharides maltose, turanose, maltotriose, and sucrose	0.989761	0.904972	1.56482	1.24989	0.895706	1.54879	1.23709	0.97415	0.7153	0.00601368	0.356492	0.686641	0.0200414	0.30694	no
YBR300C	NA	Dubious open reading frame; unlikely to encode a functional protein, based on available experimental and comparative sequence data; partially overlaps the verified gene YBR301W; YBR300C is not an essential gene	0.753215	1.48285	1.82858	0.819827	1.1169	1.37731	0.617506	0.682666	0.556738	0.24831	0.858136	0.903719	0.640026	0.462909	no
YBR301W	PAU24	Cell wall mannoprotein; has similarity to Tir1p, Tir2p, Tir3p, and Tir4p; member of the seripauperin multigene family encoded mainly in subtelomeric regions; expressed under anaerobic conditions, completely repressed during aerobic growth	0.788446	0.815044	1.2577	0.403093	0.642618	0.991632	0.317817	0.704514	0.780201	0.682835	0.159805	0.483232	0.99258	0.0351305	no
YBR302C	COS2	Endosomal protein involved in turnover of plasma membrane proteins; member of the DUP380 subfamily of conserved, often subtelomeric COS genes; required for the multivesicular vesicle body sorting pathway that internalizes plasma membrane proteins for degradation; Cos proteins provide ubiquitin in trans for nonubiquitinated cargo proteins	0.738935	1.19104	1.56285	1.0994	0.880099	1.15485	0.812387	2.4088e-05	0.0265771	4.60208e-11	0.381303	0.154352	0.0977002	0.00580121	no
YCL001W	RER1	Protein involved in retention of membrane proteins; including Sec12p, in the ER; localized to Golgi; functions as a retrieval receptor in returning membrane proteins to the ER	0.982945	1.08216	1.22034	1.07876	1.06371	1.19952	1.06036	0.881193	0.375401	0.00328623	0.477272	0.534452	0.0183694	0.51837	no
YCL001W-A	NA	Putative protein of unknown function; YCL001W-A gene has similarity to DOM34 and is present in a region duplicated between chromosomes XIV and III	1.16598	1.28254	1.00608	0.845341	1.49541	1.17307	0.985651	0.748695	0.562815	0.987009	0.792006	0.336552	0.760645	0.978319	no
YCL001W-B	NA	Putative protein of unknown function; present in a region duplicated between chromosomes XIV and III; YCL001W-B has a paralog, DOM34, that arose from the whole genome duplication	0.994141	0.974512	1.4703	1.20012	0.968802	1.46169	1.19309	0.995881	0.976358	0.443529	0.836935	0.97468	0.518576	0.782868	no
YCL002C	NA	Putative protein of unknown function; YCL002C is not an essential gene	1.06187	1.2287	1.29303	1.18579	1.30471	1.37302	1.25916	0.547054	0.00472428	0.000177922	0.0375246	0.000381716	1.78322e-05	0.00181074	no
YCL004W	PGS1	Phosphatidylglycerolphosphate synthase; catalyzes the synthesis of phosphatidylglycerolphosphate from CDP-diacylglycerol and sn-glycerol 3-phosphate in the first committed and rate-limiting step of cardiolipin biosynthesis	0.98466	0.994433	1.13309	0.912791	0.979178	1.11571	0.898789	0.930842	0.97944	0.270665	0.599289	0.919661	0.422739	0.418267	no
YCL005W	LDB16	Protein involved in lipid droplet (LD) assembly; forms a complex with Sei1p at ER-LD contact sites, stabilizing contact sites; ensures that LDs bud from the ER towards the cytosolic side of the membrane; null mutants have decreased net negative cell surface charge and localized accumulation of phosphatidic acid (PA) marker proteins; GFP-fusion protein expression is induced in response to MMS; nul…	1.04979	0.939699	0.834936	0.938564	0.986487	0.876508	0.985296	0.670594	0.586488	0.0290892	0.652642	0.935408	0.191226	0.910496	no
YCL005W-A	VMA9	Vacuolar H+ ATPase subunit e of the V-ATPase V0 subcomplex; essential for vacuolar acidification; interacts with the V-ATPase assembly factor Vma21p in the ER; involved in V0 biogenesis	1.09693	1.21658	1.07841	2.03745	1.3345	1.18294	2.23494	0.955367	0.900426	0.957019	0.627408	NA	0.923142	0.477152	no
YCL007C	NA	Dubious open reading frame; unlikely to encode a functional protein, based on available experimental and comparative sequence data; overlaps verified ORF YCL005W-A; mutations in YCL007C were thought to confer sensitivity to calcofluor white, but this phenotype was later shown to be due to the defect in YCL005W-A	NA	NA	NA	NA	NA	NA	NA	NA	NA	NA	NA	NA	NA	NA	no
YCL008C	STP22	Component of the ESCRT-I complex; ESCRT-I is involved in ubiquitin-dependent sorting of proteins into the endosome; prevents polyubiquitination of the arrestin-related protein Rim8p, thereby directing its monoubiquitination by Rsp5p; homologous to the mouse and human Tsg101 tumor susceptibility gene; mutants exhibit a Class E Vps phenotype;	1.31864	0.783452	0.794982	1.06659	1.03309	1.0483	1.40646	0.00130637	0.00481901	0.00666578	0.661696	0.831681	0.731473	3.94231e-05	Gcn4
YCL009C	ILV6	Regulatory subunit of acetolactate synthase; acetolactate synthase catalyzes the first step of branched-chain amino acid biosynthesis; enhances activity of the Ilv2p catalytic subunit, localizes to mitochondria	2.73058	0.301073	0.47471	1.59711	0.822103	1.29623	4.36103	2.02856e-14	1.47168e-20	2.71527e-08	0.00181942	0.28998	0.135772	3.90922e-31	Gcn4
YCL010C	SGF29	Component of the HAT/Core module of the SAGA, SLIK, and ADA complexes; HAT/Core module also contains Gcn5p, Ngg1p, and Ada2p; binds methylated histone H3K4; involved in transcriptional regulation through SAGA and TBP recruitment to target promoters and H3 acetylation	1.04672	1.10984	0.943998	1.10852	1.16168	0.988098	1.1603	0.733722	0.367454	0.620248	0.44924	0.182081	0.946993	0.153102	no
YCL011C	GBP2	Poly(A+) RNA-binding protein; key surveillance factor for the selective export of spliced mRNAs from the nucleus to the cytoplasm; preference for intron-containing genes; similar to Npl3p; also binds single-stranded telomeric repeat sequence in vitro; relocalizes to the cytosol in response to hypoxia; GBP2 has a paralog, HRB1, that arose from the whole genome duplication	0.966033	1.04707	1.2291	1.09601	1.01151	1.18735	1.05879	0.673932	0.572598	0.000194444	0.22905	0.921507	0.00606283	0.434127	no
YCL012C	NA	Protein of unknown function; SWAT-GFP and mCherry fusion proteins localize to the endoplasmic reticulum and vacuole respectively; orthologs are present in S, bayanus, S, paradoxus and Ashbya gossypii; YCL012C is not an essential gene	0.907325	0.919371	1.24672	0.963036	0.834168	1.13118	0.873787	0.562521	0.652849	0.0888585	0.888962	0.257783	0.458329	0.38814	no
YCL014W	BUD3	Guanine nucleotide exchange factor (GEF) for Cdc42p; activates Cdc42p in early G1, accounting for the first stage of biphasic activation, with Cdc24p accounting for the second stage in late G1; involved in the Cdc42p-mediated assembly of the axial landmark that dictates the site for the next round of budding, resulting in the axial budding pattern observed in haploids; localizes with septins to t…	1.01436	1.0422	0.996546	1.01663	1.05717	1.01086	1.03123	0.918284	0.745533	0.976522	0.928846	0.648554	0.946031	0.8033	no
YCL016C	DCC1	Subunit of a complex with Ctf8p and Ctf18p; shares some components with Replication Factor C; required for sister chromatid cohesion and telomere length maintenance	0.92768	1.02973	1.07549	0.984948	0.955262	0.997713	0.913717	0.544214	0.851073	0.516899	0.94414	0.756383	0.990748	0.447868	no
YCL017C	NFS1	Cysteine desulfurase; involved in iron-sulfur cluster (Fe/S) biogenesis and in thio-modification of mitochondrial and cytoplasmic tRNAs; essential protein located predominantly in mitochondria	0.949093	0.882801	0.957313	1.0174	0.83786	0.908579	0.965605	0.463048	0.036358	0.518474	0.884288	0.00236104	0.154485	0.651253	no
YCL018W	LEU2	Beta-isopropylmalate dehydrogenase (IMDH); catalyzes the third step in the leucine biosynthesis pathway; can additionally catalyze the conversion of beta-ethylmalate into alpha-ketovalerate	2.1226	0.578736	3.04845	4.89853	1.22843	6.47064	10.3976	2.15864e-06	0.000850676	2.23396e-13	9.17603e-26	0.34538	2.36317e-36	1.98244e-58	no
YCL021W-A	NA	Putative protein of unknown function; SWAT-GFP and mCherry fusion proteins localize to the vacuole	1.53299	0.690822	0.868829	1.48797	1.05902	1.33191	2.28105	0.217821	0.310106	0.710888	0.306564	0.924316	0.477581	0.00498887	no
YCL022C	NA	Dubious open reading frame; unlikely to encode a functional protein, based on available experimental and comparative sequence data; completely overlaps verified gene KCC4/YCL024W	NA	NA	NA	NA	NA	NA	NA	NA	NA	NA	NA	NA	NA	NA	no
YCL023C	NA	Dubious open reading frame; unlikely to encode a functional protein, based on available experimental and comparative sequence data; partially overlaps verified ORF KCC4	1.53787	5.98845	0.584095	0.625045	9.20945	1	1	NA	NA	NA	NA	NA	NA	NA	no
YCL024W	KCC4	Protein kinase of the bud neck involved in the septin checkpoint; associates with septin proteins, negatively regulates Swe1p by phosphorylation, shows structural homology to bud neck kinases Gin4p and Hsl1p; KCC4 has a paralog, GIN4, that arose from the whole genome duplication	0.979741	0.996603	1.04272	0.944958	0.976412	1.0216	0.925814	0.918447	0.991848	0.794276	0.814755	0.920949	0.923568	0.646493	no
YCL025C	AGP1	Low-affinity amino acid permease with broad substrate range; involved in uptake of asparagine, glutamine, and other amino acids; expression regulated by SPS plasma membrane amino acid sensor system (Ssy1p-Ptr3p-Ssy5p); AGP1 has a paralog, GNP1, that arose from the whole genome duplication	1.82989	0.585488	0.521538	1.42811	1.07138	0.954356	2.61328	1.28849e-06	1.74477e-05	1.01089e-07	0.0110837	0.737307	0.832846	3.09413e-16	Gcn4
YCL026C-A	FRM2	Type II nitroreductase, using NADH as reductant; mutants are defective in fatty acid mediated repression of genes involved in fatty acid biosynthesis indicative of a role in lipid signaling; involved in the oxidative stress response; transcription induction by cadmium and selenite indicates a possible role in the metal stress response; expression induced in cells treated with the mycotoxin patulin	1.41195	0.483852	0.620784	2.4453	0.683174	0.876514	3.45263	0.133246	0.00036683	0.0201303	1.19099e-06	0.143614	0.678581	3.47402e-12	Gcn4
YCL026C-B	HBN1	Protein of unknown function; similar to bacterial nitroreductases; green fluorescent protein (GFP)-fusion protein localizes to the cytoplasm and nucleus; protein becomes insoluble upon intracellular iron depletion; protein abundance increases in response to DNA replication stress	0.474036	1.32923	2.17772	0.930157	0.630105	1.03232	0.440928	0.000746915	0.321053	0.000258795	0.887255	0.0684776	0.937396	0.000219965	no
YCL027W	FUS1	Membrane protein localized to the shmoo tip; required for cell fusion; expression regulated by mating pheromone; proposed to coordinate signaling, fusion, and polarization events required for fusion; potential Cdc28p substrate	0.82674	1.32906	1.63044	1.9757	1.09879	1.34795	1.63339	0.303008	0.0880939	0.000570722	1.71196e-06	0.676452	0.0825785	0.000593747	no
YCL028W	RNQ1	[PIN(+)] prion; an infectious protein conformation that is generally an ordered protein aggregate	0.873099	1.04988	1.09717	1.02261	0.916649	0.957942	0.892844	0.0461841	0.585773	0.176212	0.866378	0.278388	0.646404	0.106139	no
YCL029C	BIK1	Microtubule-associated protein; component of the interface between microtubules and kinetochore, involved in sister chromatid separation; essential in polyploid cells but not in haploid or diploid cells; ortholog of mammalian CLIP-170	0.966482	1.16151	1.07454	1.10967	1.12258	1.03852	1.07248	0.759243	0.0647392	0.410033	0.312147	0.212569	0.751585	0.463122	no
YCL030C	HIS4	Multifunctional enzyme containing phosphoribosyl-ATP pyrophosphatase; phosphoribosyl-AMP cyclohydrolase, and histidinol dehydrogenase activities; catalyzes the second, third, ninth and tenth steps in histidine biosynthesis	4.09944	0.188448	0.355754	1.88288	0.772533	1.45839	7.71876	3.6274e-25	3.71568e-35	9.08638e-14	2.79082e-05	0.162896	0.0270885	1.79866e-53	Gcn4
YCL031C	RRP7	Essential protein involved in rRNA processing and ribosome biogenesis; protein abundance increases in response to DNA replication stress	0.976152	1.15639	1.11895	1.01939	1.12882	1.09227	0.995084	0.818311	0.0498275	0.125851	0.899807	0.141278	0.314564	0.964608	no
YCL032W	STE50	Adaptor protein for various signaling pathways; involved in mating response, invasive/filamentous growth, osmotolerance; acts as an adaptor that links G protein-associated Cdc42p-Ste20p complex to the effector Ste11p to modulate signal transduction	0.805328	1.04711	1.13426	0.96686	0.843268	0.913453	0.77864	0.00122499	0.645314	0.0745701	0.808206	0.0224796	0.289188	0.000165205	no
YCL033C	MXR2	Methionine-R-sulfoxide reductase; involved in the response to oxidative stress; protects iron-sulfur clusters from oxidative inactivation along with MXR1; involved in the regulation of lifespan	0.757307	0.961911	1.4315	0.94406	0.728462	1.08408	0.714943	0.0144215	0.836426	0.000577109	0.794082	0.00728524	0.605611	0.00245306	no
YCL034W	LSB5	Protein involved in membrane-trafficking events at plasma membrane; interacts with actin regulators Sla1p and Las17p, ubiquitin, Arf3p to couple actin dynamics to membrane trafficking processes; similar structure to GGA family of proteins with N-terminal VHS domain and GAT domain; binds Las17p, which is homolog of human Wiskott-Aldrich Syndrome protein involved in actin patch assembly, actin poly…	0.794757	1.08668	1.30033	1.03016	0.863645	1.03344	0.818729	0.00231865	0.391535	0.000239627	0.850339	0.0950855	0.783053	0.00932147	no
YCL035C	GRX1	Glutathione-dependent disulfide oxidoreductase; hydroperoxide and superoxide-radical responsive, heat-stable, with active site cysteine pair; protects cells from oxidative damage; GRX1 has a paralog, GRX2, that arose from the whole genome duplication; protein abundance increases in response to DNA replication stress	0.829429	0.970853	1.19236	1.01599	0.805254	0.988975	0.842692	0.157561	0.881194	0.159915	0.9561	0.111566	0.96153	0.198304	no
YCL036W	GFD2	Protein of unknown function; identified as a high-copy suppressor of a dbp5 mutation; GFD2 has a paralog, YDR514C, that arose from the whole genome duplication	1.41626	0.925581	0.896752	1.02265	1.31086	1.27004	1.44834	1.37135e-05	0.488194	0.238425	0.902621	0.00176086	0.00897867	2.65682e-06	no
YCL037C	SRO9	Cytoplasmic RNA-binding protein; shuttles between nucleus and cytoplasm and is exported from the nucleus in an mRNA export-dependent manner; associates with translating ribosomes; involved in heme regulation of Hap1p as a component of the HMC complex, also involved in the organization of actin filaments; contains a La motif; SRO9 has a paralog, SLF1, that arose from the whole genome duplication	1.27889	1.18379	0.867977	1.29921	1.51394	1.11005	1.66156	0.295514	0.492829	0.539726	0.285698	0.0590309	0.736673	0.00921983	no
YCL038C	ATG22	Vacuolar integral membrane protein required for efflux of amino acids; required for efflux of amino acids during autophagic body breakdown in the vacuole; null mutation causes a gradual loss of viability during starvation	1.07303	1.18523	1.06851	0.941956	1.27179	1.14654	1.01074	0.630197	0.153733	0.61301	0.768384	0.0401872	0.307308	0.952073	no
YCL039W	GID7	Subunit of GID Complex that binds directly to central component Vid30p; GID complex is involved in proteasome-dependent catabolite inactivation of fructose-1,6-bisphosphatase; Gid7p contains six WD40 repeats; computational analysis suggests that Gid7p and Moh1p have similar functions	1.1511	0.8376	0.82003	1.22406	0.964165	0.94394	1.40903	0.157561	0.0614733	0.0238636	0.0349558	0.802785	0.662406	3.39069e-05	no
YCL040W	GLK1	Glucokinase; catalyzes the phosphorylation of glucose at C6 in the first irreversible step of glucose metabolism; one of three glucose phosphorylating enzymes; expression regulated by non-fermentable carbon sources; GLK1 has a paralog, EMI2, that arose from the whole genome duplication	0.724222	0.811178	0.919273	0.674761	0.587473	0.665757	0.488677	0.354347	0.60044	0.829846	0.312147	0.103847	0.244424	0.0126073	Gcn4
YCL041C	NA	Dubious open reading frame; unlikely to encode a functional protein, based on available experimental and comparative sequence data; partially overlaps both the verified gene PDI1/YCL043C and the uncharacterized gene YCL042W	0.217248	1.86077	2.57731	0.285972	0.404249	0.559915	0.0621269	NA	0.80524	0.620248	NA	NA	0.790386	0.112373	no
YCL042W	NA	Putative protein of unknown function; epitope-tagged protein localizes to the cytoplasm	0.198135	3.29184	2.04641	2.27381	0.65223	0.405465	0.450523	NA	NA	NA	NA	NA	NA	NA	Gcn4
YCL043C	PDI1	Protein disulfide isomerase; multifunctional oxidoreductase of the ER lumen, essential for disulfide bond formation in secretory and cell-surface proteins, processing of non-native disulfide bonds; Ero1p activator; complexes with exomannosidase, Mnl1p to facilitate the recognition of misfolded glycoproteins and the trimming of glycan Man8GlcNAc2 to Man7GlcNAc2 on substrates, thereby accelerating …	0.844149	1.16564	1.268	0.924331	0.983978	1.07038	0.780273	0.00226492	0.00610844	4.46802e-06	0.302933	0.87122	0.337134	1.82201e-06	no
YCL044C	MGR1	Subunit of the mitochondrial (mt) i-AAA protease supercomplex; i-AAA degrades misfolded mitochondrial proteins; forms a subcomplex with Mgr3p that binds to substrates to facilitate proteolysis; required for growth of cells lacking mtDNA	0.89959	1.03435	0.913548	0.984573	0.930489	0.821819	0.885712	0.340309	0.821076	0.389487	0.940986	0.583739	0.0598186	0.251564	no
YCL045C	EMC1	Member of conserved endoplasmic reticulum membrane complex; involved in efficient folding of proteins in the ER; null mutant displays induction of the unfolded protein response; interacts with Gal80p; homologous to worm H17B01,4/EMC-1, fly CG2943, and human KIAA0090	1.01824	1.06498	1.16133	1.03949	1.08441	1.18252	1.05845	0.848576	0.41694	0.0114371	0.728688	0.288931	0.0100662	0.453141	no
YCL046W	NA	Dubious open reading frame; unlikely to encode a functional protein, based on available experimental and comparative sequence data; partially overlaps the uncharacterized ORF YCL045C	0.789574	0.633421	0.584096	0.625046	0.500133	0.461187	0.49352	NA	NA	NA	NA	NA	NA	NA	no
YCL047C	POF1	Nicotinamide mononucleotide-specific adenylyltransferase (NMNAT); catalyzes the conversion of nicotinamide mononucleotide (NMN) to nicotinamide adenine dinucleotide (NAD+); role in the nicotinamide riboside (NR) salvage pathway of NAD+ biosynthesis; involved in NR and NAD+ homeostasis; ATPase involved in protein quality control and filamentation pathways; interacts physically with Kss1p and suppr…	1.1649	0.973236	0.952772	1.15951	1.13372	1.10989	1.35072	0.180919	0.869199	0.70286	0.242961	0.333925	0.434875	0.00217283	no
YCL048W	SPS22	Protein of unknown function; SPS22 has a paralog, SPS2, that arose from the whole genome duplication; redundant with Sps2p for the organization of the beta-glucan layer of the spore wall	0.79134	0.695006	0.978528	0.787033	0.549986	0.774348	0.622811	0.642586	0.47134	0.967929	0.731497	0.193751	0.634187	0.28076	no
YCL048W-A	NA	Putative protein of unknown function; SWAT-GFP and mCherry fusion proteins localize to the cell periphery and vacuole; YCL048W-A has a paralog, YDR524C-B, that arose from the whole genome duplication	2.57322	0.75983	0.858383	1.16377	1.95521	2.20881	2.99464	0.318105	0.81716	0.880949	0.923727	NA	0.448987	0.219718	no
YCL049C	NA	Protein of unknown function; localizes to membrane fraction; YCL049C is not an essential gene	0.829987	0.736064	0.949797	0.881772	0.610924	0.78832	0.73186	0.0137769	1.56743e-05	0.575027	0.179161	4.48287e-13	0.00229712	8.41362e-06	no
YCL050C	APA1	AP4A phosphorylase; bifunctional diadenosine 5',5'''-P1,P4-tetraphosphate phosphorylase and ADP sulfurylase involved in catabolism of bis(5'-nucleosidyl) tetraphosphates; catalyzes phosphorolysis of dinucleoside oligophosphates, cleaving substrates' alpha/beta-anhydride bond and introducing Pi into the beta-position of the corresponding NDP formed; protein abundance increases under DNA replicatio…	0.80345	1.04813	1.30571	1.1693	0.842123	1.04907	0.939477	7.80408e-08	0.408974	1.53696e-11	0.000415232	6.91535e-05	0.400654	0.216291	no
YCL051W	LRE1	Protein involved in control of cell wall structure and stress response; direct inhibitor of the nuclear Dbf2 related (NDR) kinase Cbk1p-Mob2p; overproduction confers resistance to cell-wall degrading enzymes; exhibits genetic interactions with genes involved in the cell wall integrity pathway; LRE1 has a paralog, HLR1, that arose from the whole genome duplication	1.17993	1.0847	0.98418	1.03073	1.27987	1.16126	1.21619	0.0869995	0.476927	0.895016	0.866378	0.00816796	0.160003	0.0345316	no
YCL052C	PBN1	Component of glycosylphosphatidylinositol-mannosyltransferase I; essential component; required for the autocatalytic post-translational processing of the protease B precursor Prb1p; localizes to ER in lumenal orientation; homolog of mammalian PIG-X	0.816795	1.16498	1.17866	1.08352	0.951552	0.962727	0.885015	0.0083379	0.0609311	0.0301606	0.486007	0.653605	0.746148	0.149243	no
YCL054W	SPB1	AdoMet-dependent methyltransferase; involved in rRNA processing and 60S ribosomal subunit maturation; methylates G2922 in the tRNA docking site of the large subunit rRNA and in the absence of snR52, U2921; suppressor of PAB1 mutants	1.10393	0.967829	1.07015	0.991263	1.06842	1.18137	1.09428	0.44661	0.848019	0.593003	0.971405	0.657945	0.174165	0.484595	no
YCL054W-A	RDT1	Short open reading frame, shows evidence of translation; may be new protein-coding gene that originated de novo from noncoding sequence; same allele found in at least 33 other S, cerevisiae strains; at least 3 strains have a second allele with three nucleotide substitutions leading to two amino acid differences	0.582391	1.09798	1.27632	1.12154	0.639455	0.743319	0.653175	0.397598	0.91565	0.714919	0.919197	0.529199	0.700177	0.512708	no
YCL055W	KAR4	Transcription factor required for response to pheromones; also required during meiosis; exists in two forms, a slower-migrating form more abundant during vegetative growth and a faster-migrating form induced by pheromone	0.747662	1.34313	1.42962	1.07977	1.00421	1.06888	0.807306	0.000934148	0.000613898	1.57611e-05	0.612778	0.983119	0.597747	0.0207153	no
YCL056C	PEX34	Protein that regulates peroxisome populations; peroxisomal integral membrane protein; interacts with Pex11p, Pex25p, and Pex27p to control both constitutive peroxisome division and peroxisome morphology and abundance during peroxisome proliferation	0.967195	1.12755	1.44582	1.10551	1.09056	1.39839	1.06924	0.853145	0.414844	0.000558168	0.594709	0.606176	0.00554226	0.678084	no
YCL057C-A	MIC10	Conserved component of the MICOS complex; MICOS (formerly MINOS or MitOS) is a mitochondrial inner membrane complex that extends into the intermembrane space and has a role in the maintenance of crista junctions, inner membrane architecture, and formation of contact sites to the outer membrane; forms a subcomplex with Mic12p and Mic27p whose assembly and stability requires cardiolipin; homo-oligo…	0.917798	0.886903	1.00584	0.988997	0.813998	0.923161	0.907699	0.631011	0.488512	0.974792	0.971405	0.189496	0.679556	0.567233	no
YCL057W	PRD1	Zinc metalloendopeptidase; found in the cytoplasm and intermembrane space of mitochondria; with Cym1p, involved in degradation of mitochondrial proteins and of presequence peptides cleaved from imported proteins; protein abundance increases in response to DNA replication stress	0.720436	1.11802	1.34043	1.01262	0.805464	0.965691	0.729532	0.000706096	0.372959	0.00210566	0.960244	0.0492452	0.827674	0.001067	no
YCL058C	FYV5	Protein involved in regulation of the mating pathway; binds with Matalpha2p to promoters of haploid-specific genes; required for survival upon exposure to K1 killer toxin; involved in ion homeostasis	NA	NA	NA	NA	NA	NA	NA	NA	NA	NA	NA	NA	NA	NA	no
YCL058W-A	ADF1	Transcriptional repressor encoded by the FYV5 antisense strand; negatively regulates transcription of FYV5 by binding to the promoter on the sense strand	NA	NA	NA	NA	NA	NA	NA	NA	NA	NA	NA	NA	NA	NA	no
YCL059C	KRR1	Nucleolar protein required for rRNA synthesis and ribosomal assembly; required for the synthesis of 18S rRNA and for the assembly of 40S ribosomal subunit; essential gene	0.980867	1.15175	1.24487	1.00957	1.12972	1.22106	0.990252	0.891054	0.159892	0.0112605	0.965978	0.263901	0.0415211	0.944825	no
YCL061C	MRC1	S-phase checkpoint protein required for DNA replication; couples DNA helicase and polymerase; interacts with and stabilizes Pol2p at stalled replication forks during stress, where it forms a pausing complex with Tof1p and is phosphorylated by Mec1p; defines a novel S-phase checkpoint with Hog1p that coordinates DNA replication and transcription upon osmostress; protects uncapped telomeres; Dia2p-…	1.03006	0.968837	0.857732	1.42232	0.997956	0.883512	1.46507	0.833816	0.836409	0.116063	7.31252e-05	0.991038	0.292329	7.89696e-06	no
YCL063W	VAC17	Phosphoprotein involved in vacuole inheritance; degraded in late M phase of the cell cycle; acts as a vacuole-specific receptor for myosin Myo2p; involved in regulation of asymmetric inheritance of aggregated/misfolded proteins and age reset	1.04952	1.04533	1.03869	1.03771	1.0971	1.09012	1.0891	0.718485	0.761193	0.753824	0.845004	0.467208	0.49508	0.469193	no
YCL064C	CHA1	Catabolic L-serine (L-threonine) deaminase; catalyzes the degradation of both L-serine and L-threonine; required to use serine or threonine as the sole nitrogen source, transcriptionally induced by serine and threonine	0.369046	1.77158	1.52696	1.17419	0.653795	0.563518	0.433328	1.2026e-13	5.26983e-05	0.00366998	0.480972	0.00659315	0.000152445	6.35873e-10	no
YCL065W	NA	Dubious open reading frame; unlikely to encode a functional protein, based on available experimental and comparative sequence data; overlaps HMLALPHA1	4.72044	0.438723	0.809302	0.443594	2.07097	3.82026	2.09396	NA	NA	NA	NA	NA	NA	NA	no
YCL066W	HMLALPHA1	Silenced copy of ALPHA1 at HML; ALPHA1 encodes a transcriptional coactivator involved in the regulation of mating-type alpha-specific gene expression	1	1	1	2.37117	1	1	1.87222	NA	NA	NA	NA	NA	NA	NA	no
YCL067C	HMLALPHA2	Silenced copy of ALPHA2 at HML; homeobox-domain protein that associates with Mcm1p in haploid cells to repress a-specific gene expression and interacts with a1p in diploid cells to repress haploid-specific gene expression	1.05801	1.03698	1.14131	0.958541	1.09714	1.20752	1.01415	0.698452	0.831293	0.238671	0.840059	0.518064	0.116714	0.932544	no
YCL068C	NA	Putative protein of unknown function	1.09213	1.40372	1.19693	1.02811	1.53305	1.30721	1.12283	0.795498	0.172787	0.491073	0.96041	0.100072	0.35625	0.725417	no
YCL069W	VBA3	Permease of basic amino acids in the vacuolar membrane; VBA3 has a paralog, VBA5, that arose from a segmental duplication	1.59676	0.668434	0.65375	0.559738	1.06733	1.04388	0.893768	0.0119813	0.0327635	0.0166982	0.00210327	0.842517	0.899601	0.679517	no
YCL073C	GEX1	Proton:glutathione antiporter; localized to the vacuolar and plasma membranes; imports glutathione from the vacuole and exports it through the plasma membrane; has a role in resistance to oxidative stress and modulation of the PKA pathway; GEX1 has a paralog, GEX2, that arose from a segmental duplication	0.829922	0.52802	2.41218	0.403468	0.438215	2.00192	0.334847	0.822603	0.427375	0.102469	0.31578	NA	0.282653	0.13573	no
YCL076W	NA	Dubious open reading frame; unlikely to encode a functional protein, based on available experimental and comparative sequence data	11.2078	0.0869145	0.156102	0.165232	1	1.74957	1.85189	NA	NA	NA	NA	NA	NA	NA	no
YCR001W	NA	Putative protein of unknown function; conserved among S, cerevisiae strains; YCR001W is not an essential gene	0.806087	1.39172	1.4794	1.16135	1.12185	1.19253	0.936152	0.597568	0.380276	0.228346	0.801026	0.81754	0.691521	0.891559	no
YCR002C	CDC10	Component of the septin ring, required for cytokinesis; septins are GTP-binding proteins that assemble into rod-like hetero-oligomers that can associate to form filaments; septin rings at the mother-bud neck act as scaffolds for recruiting cell division factors and as barriers to prevent diffusion of specific proteins between mother and daughter cells; N-terminus interacts with phosphatidylinosit…	0.838688	1.04419	1.18851	1.08101	0.87575	0.996788	0.906634	0.000209919	0.519556	0.000184477	0.222464	0.0117667	0.975393	0.0632631	no
YCR003W	MRPL32	Mitochondrial ribosomal protein of the large subunit; protein abundance increases in response to DNA replication stress	1.20153	0.606717	0.667198	0.718897	0.72899	0.801661	0.863779	0.200644	2.16846e-05	0.000690159	0.0137999	0.0211813	0.139659	0.328004	no
YCR004C	YCP4	Protein of unknown function; has sequence and structural similarity to flavodoxins; predicted to be palmitoylated; the authentic, non-tagged protein is detected in highly purified mitochondria in high-throughput studies	0.994505	0.951064	1.17634	1.12402	0.945838	1.16987	1.11784	0.980356	0.804805	0.239824	0.560791	0.780746	0.321148	0.479503	no
YCR005C	CIT2	Citrate synthase, peroxisomal isozyme involved in glyoxylate cycle; catalyzes condensation of acetyl coenzyme A and oxaloacetate to form citrate; expression is controlled by Rtg1p and Rtg2p transcription factors; SCF-Ucc1 regulates level of Cit2p to maintain citrate homeostasis; oxaloacetate-dependent positive feedback loop inhibits Cit2p ubiquitination; CIT2 has a paralog, CIT1, that arose from …	0.323508	1.18689	0.962123	0.939705	0.383968	0.311254	0.304002	2.86519e-05	0.686869	0.925082	0.921458	0.000778812	3.81017e-05	7.27719e-06	no
YCR006C	NA	Putative protein of unknown function; conserved among S, cerevisiae strains; YCR006C is not an essential gene	1.28834	1.18607	1.08837	1.08519	1.52807	1.4022	1.3981	0.413821	0.610817	0.790955	0.869175	0.148689	0.275883	0.242894	no
YCR007C	NA	Putative integral membrane protein; member of DUP240 gene family; SWAT-GFP and mCherry fusion proteins localize to the cell periphery and vacuole; YCR007C is not an essential gene	0.661489	1.05109	1.21767	1.13567	0.695284	0.805476	0.751231	0.0242802	0.868864	0.326705	0.689622	0.0701025	0.329099	0.144875	no
YCR008W	SAT4	Ser/Thr protein kinase involved in salt tolerance; funtions in regulation of Trk1p-Trk2p potassium transporter; overexpression affects the Fe-S and lipoamide containing proteins in the mitochondrion; required for lipoylation of Lat1p, Kgd2p and Gcv3p; partially redundant with Hal5p; has similarity to Npr1p; localizes to the cytoplasm and mitochondrion	1.01925	1.1761	0.853934	1.00514	1.19874	0.870373	1.02449	0.82195	0.00285105	0.00371665	0.970223	0.0014161	0.0272131	0.770415	no
YCR009C	RVS161	Amphiphysin-like lipid raft protein; N-BAR domain protein that interacts with Rvs167p and regulates polarization of the actin cytoskeleton, endocytosis, cell polarity, cell fusion and viability following starvation or osmotic stress	0.796623	1.13382	1.22873	1.15606	0.903226	0.978832	0.920941	0.00147222	0.124454	0.0032541	0.0882051	0.258267	0.85903	0.342083	no
YCR010C	ADY2	Acetate transporter required for normal sporulation; phosphorylated in mitochondria; ADY2 has a paralog, ATO2, that arose from the whole genome duplication	0.86651	0.9158	1.54134	1.05413	0.79355	1.33559	0.913417	0.592583	0.78548	0.0229608	0.902621	0.386142	0.217933	0.755954	no
YCR011C	ADP1	Putative ATP-dependent permease of the ABC transporter family	1.08244	1.08351	0.796395	0.85889	1.17284	0.862052	0.929699	0.405488	0.404516	0.00196715	0.0887167	0.0645353	0.100817	0.45123	no
YCR012W	PGK1	3-phosphoglycerate kinase; catalyzes transfer of high-energy phosphoryl groups from the acyl phosphate of 1,3-bisphosphoglycerate to ADP to produce ATP; key enzyme in glycolysis and gluconeogenesis	0.823167	0.870062	1.15908	0.983937	0.716206	0.954116	0.809945	0.014306	0.105671	0.0643712	0.925946	5.49764e-06	0.683634	0.00618436	no
YCR013C	NA	Dubious open reading frame; unlikely to encode a functional protein, based on available experimental and comparative sequence data; transcription of both YCR013C and the overlapping essential gene PGK1 is reduced in a gcr1 null mutant	1	4.92675	8.3179	2.37119	3.89003	6.56758	1.87223	NA	NA	NA	NA	NA	NA	NA	no
YCR014C	POL4	DNA polymerase IV; undergoes pair-wise interactions with Dnl4p-Lif1p and Rad27p to mediate repair of DNA double-strand breaks by non-homologous end joining (NHEJ); homologous to mammalian DNA polymerase beta	1.14497	0.997543	0.932257	1.04032	1.14216	1.06741	1.19114	0.292993	0.993323	0.591635	0.856996	0.341532	0.689249	0.147224	no
YCR015C	CTO1	Protein required for cold tolerance; involved in phosphate uptake; YCR015C is not an essential gene	0.81396	1.27775	1.09422	0.977189	1.04004	0.89065	0.795393	0.159199	0.0809354	0.573041	0.938503	0.862708	0.510305	0.112103	no
YCR016W	NA	Putative protein of unknown function; green fluorescent protein (GFP)-fusion protein localizes to the nucleolus and nucleus; predicted to be involved in ribosome biogenesis	0.965055	1.11622	1.26107	0.975438	1.07721	1.217	0.941352	0.63212	0.0560247	2.34759e-06	0.818706	0.270994	0.000342759	0.355582	no
YCR017C	CWH43	GPI lipid remodelase; responsible for introducing ceramides into GPI anchors having a C26:0 fatty acid in sn-2 of the glycerol moiety; can also use lyso-GPI protein anchors and various base resistant lipids as substrates; contains 14-16 transmembrane segments and several putative glycosylation and phosphorylation sites; null mutation is synthetically lethal with pkc1 deletion	1.01445	0.939223	1.018	1.03038	0.952791	1.03271	1.04527	0.872126	0.376152	0.815207	0.78279	0.542061	0.705045	0.54297	no
YCR018C	SRD1	Protein involved in the processing of pre-rRNA to mature rRNA; contains a C2/C2 zinc finger motif; srd1 mutation suppresses defects caused by the rrp1-1 mutation	0.787279	1.29159	1.3016	0.810302	1.01684	1.02472	0.637934	0.124468	0.0958027	0.0655481	0.268488	0.953414	0.923568	0.00117085	no
YCR018C-A	NA	Putative protein of unknown function; encoded opposite a Ty1 LTR	1.02563	0.944437	0.825314	1.15652	0.968647	0.846469	1.18617	0.91186	0.794673	0.197522	0.482312	0.902232	0.337907	0.285355	no
YCR019W	MAK32	Protein necessary for stability of L-A dsRNA-containing particles	0.93685	1.18222	1.03762	1.05256	1.10756	0.972094	0.986088	0.625487	0.120739	0.774291	0.784257	0.431682	0.863579	0.929041	no
YCR020C	PET18	Protein of unknown function; has weak similarity to proteins involved in thiamin metabolism; expression is induced in the absence of thiamin	0.942293	1.03271	2.26524	1.48287	0.973116	2.13452	1.3973	0.837599	0.919055	6.34388e-07	0.0597901	0.942771	2.46947e-05	0.0976988	no
YCR020C-A	MAK31	Non-catalytic subunit of N-terminal acetyltransferase of the NatC type; required for replication of dsRNA virus; member of the Sm protein family	1.02828	0.970162	1.02183	1.20954	0.997594	1.05072	1.24374	0.875422	0.869699	0.889437	0.157799	0.991038	0.78051	0.0654024	no
YCR020W-B	HTL1	Component of the RSC chromatin remodeling complex; RSC functions in transcriptional regulation and elongation, chromosome stability, and establishing sister chromatid cohesion; involved in telomere maintenance	0.957499	1.34595	1.97693	1.40558	1.28874	1.89291	1.34584	0.893862	0.206789	0.000329153	0.174262	0.324435	0.00245766	0.192737	no
YCR021C	HSP30	Negative regulator of the H(+)-ATPase Pma1p; stress-responsive protein; hydrophobic plasma membrane localized; induced by heat shock, ethanol treatment, weak organic acid, glucose limitation, and entry into stationary phase	0.945009	1.43702	0.709072	0.441681	1.358	0.670079	0.417392	0.946738	0.600628	0.572194	0.187574	0.673728	0.561818	0.104161	no
YCR022C	NA	Putative protein of unknown function; conserved among S, cerevisiae strains; YCR022C is not an essential gene	1.14289	0.769308	1.29186	1.23046	0.879232	1.47645	1.40628	0.833816	0.672179	0.612249	0.793014	0.866286	0.481722	0.520464	no
YCR023C	NA	Vacuolar membrane protein of unknown function; member of the multidrug resistance family; YCR023C is not an essential gene	1.51002	0.656947	0.784014	1.38776	0.992004	1.18388	2.09556	5.46421e-05	2.80183e-05	0.021936	0.00245224	0.973683	0.1959	4.57889e-15	Gcn4
YCR024C	SLM5	Mitochondrial asparaginyl-tRNA synthetase	1.18097	0.644795	0.647836	0.800273	0.761482	0.765074	0.945096	0.267339	0.000323433	0.000318651	0.148588	0.0607968	0.0691251	0.76243	no
YCR024C-A	PMP1	Regulatory subunit for the plasma membrane H(+)-ATPase Pma1p; small single-membrane span proteolipid; forms unique helix and positively charged cytoplasmic domain that is able to specifically segregate phosphatidylserines; PMP1 has a paralog, PMP2, that arose from the whole genome duplication	0.764386	1.08201	0.810674	1.21102	0.827076	0.619668	0.925688	0.669523	0.917967	0.721788	0.836234	0.796014	0.418037	0.91363	no
YCR024C-B	NA	Putative protein of unknown function; identified by expression profiling and mass spectrometry	0.864984	0.965266	0.970397	1.03863	0.83494	0.839378	0.8984	0.536534	0.910248	0.906963	0.924242	0.45116	0.460966	0.66452	no
YCR025C	NA	Putative protein of unknown function; conserved across S, cerevisiae strains; YCR025C is not an essential gene	1.14242	1.10243	1.81501	1.50694	1.25944	2.07351	1.72157	0.771258	0.84852	0.0500898	0.321475	0.613001	0.0307609	0.106051	no
YCR026C	NPP1	Nucleotide pyrophosphatase/phosphodiesterase; mediates extracellular nucleotide phosphate hydrolysis along with Npp2p and Pho5p; activity and expression enhanced during conditions of phosphate starvation; involved in spore wall assembly; NPP1 has a paralog, NPP2, that arose from the whole genome duplication, and an npp1 npp2 double mutant exhibits reduced dityrosine fluorescence relative to the s…	0.99645	0.921358	1.02918	1.08274	0.918087	1.02553	1.0789	0.974872	0.327253	0.741038	0.409226	0.330546	0.818123	0.348467	no
YCR027C	RHB1	Putative Rheb-related GTPase; involved in regulating canavanine resistance and arginine uptake; member of the Ras superfamily of G-proteins	1.15183	1.09324	0.886585	1.09198	1.25923	1.0212	1.25778	0.410032	0.651438	0.455479	0.724554	0.158632	0.934719	0.131451	no
YCR028C	FEN2	Plasma membrane H+-pantothenate symporter; confers sensitivity to the antifungal agent fenpropimorph; relocalizes from vacuole to cytoplasm upon DNA replication stress	1.03307	1.03294	1.1803	1.06658	1.0671	1.21934	1.10185	0.747914	0.764977	0.0141804	0.558888	0.500902	0.00751675	0.226783	no
YCR028C-A	RIM1	ssDNA-binding protein essential for mitochondrial genome maintenance; involved in mitochondrial DNA replication; stimulates utilization by Mip1p DNA polymerase of RNA primers synthesized by Rpo41p	0.877996	0.98307	1.016	1.13605	0.863131	0.89204	0.997444	0.248903	0.91715	0.907417	0.336776	0.205673	0.349182	0.985926	no
YCR030C	SYP1	Negative regulator of WASP-Arp23 complex; involved in endocytic site formation; directly inhibits Las17p stimulation of Arp23 complex-mediated actin assembly in vitro; may regulate assembly and disassembly of the septin ring; colocalizes and interacts with septin subunits; potential role in actin cytoskeletal organization	0.788113	0.944452	1.07089	0.980872	0.744336	0.843984	0.773039	6.0116e-05	0.503332	0.334871	0.886205	6.81143e-07	0.0121141	1.36202e-05	no
YCR031C	RPS14A	Protein component of the small (40S) ribosomal subunit; required for ribosome assembly and 20S pre-rRNA processing; mutations confer cryptopleurine resistance; homologous to mammalian ribosomal protein S14 and bacterial S11; RPS14A has a paralog, RPS14B, that arose from the whole genome duplication	0.83609	1.09329	1.04764	1.20719	0.914089	0.875924	1.00932	0.00346057	0.215296	0.531201	0.00291367	0.232935	0.0557809	0.924273	no
YCR032W	BPH1	Protein homologous to Chediak-Higashi syndrome and Beige proteins; both of which are implicated in disease syndromes in human and mouse, respectively, due to defective lysosomal trafficking; mutant phenotype and genetic interactions suggest a role in protein sorting	1.06264	1.04622	0.964428	1.03177	1.11175	1.02484	1.09639	0.635671	0.753534	0.766263	0.871264	0.389272	0.878954	0.427507	no
YCR033W	SNT1	Subunit of the Set3C deacetylase complex; interacts directly with the Set3C subunit, Sif2p; putative DNA-binding protein; mutant has increased aneuploidy tolerance; relocalizes to the cytosol in response to hypoxia	1.05617	1.02252	0.958272	0.996586	1.07995	1.0121	1.05256	0.661715	0.882619	0.714519	0.98681	0.542647	0.943763	0.684687	no
YCR034W	ELO2	Fatty acid elongase, involved in sphingolipid biosynthesis; acts on fatty acids of up to 24 carbons in length; mutations have regulatory effects on 1,3-beta-glucan synthase, vacuolar ATPase, and the secretory pathway; ELO2 has a paralog, ELO1, that arose from the whole genome duplication; lethality of the elo2 elo3 double null mutation is functionally complemented by human ELOVL1 and weakly compl…	0.982943	0.99675	0.980365	0.980756	0.979749	0.963644	0.964028	0.855357	0.97944	0.810169	0.87935	0.845037	0.682622	0.662359	no
YCR035C	RRP43	Exosome non-catalytic core component; involved in 3'-5' RNA processing and degradation in both the nucleus and the cytoplasm; has similarity to E, coli RNase PH and to human hRrp43p (OIP2, EXOSC8); protein abundance increases in response to DNA replication stress	1.05927	1.08974	1.05952	1.06297	1.15432	1.12232	1.12597	0.433025	0.198356	0.378262	0.481709	0.0223907	0.0852737	0.054158	no
YCR036W	RBK1	Putative ribokinase	0.799803	0.835424	1.08559	0.927669	0.668175	0.868259	0.741952	0.00229492	0.0223262	0.328322	0.522431	7.47416e-09	0.100318	2.47895e-05	no
YCR037C	PHO87	Low-affinity inorganic phosphate (Pi) transporter; acts upstream of Pho81p in regulation of the PHO pathway; expression is independent of Pi concentration and Pho4p activity; contains 12 membrane-spanning segments; PHO87 has a paralog, PHO90, that arose from the whole genome duplication	1.00966	0.988758	1.04122	1.05377	0.998309	1.05128	1.06394	0.933697	0.921252	0.633271	0.650567	0.99033	0.608427	0.464687	no
YCR038C	BUD5	GTP/GDP exchange factor for Rsr1p (Bud1p); required for both axial and bipolar budding patterns; mutants exhibit random budding in all cell types	1.07759	1.08502	0.914289	1.00982	1.16921	0.985231	1.08818	0.718408	0.702925	0.619099	0.977238	0.417105	0.959069	0.678738	no
YCR038W-A	NA	Dubious open reading frame; unlikely to encode a functional protein, based on available experimental and comparative sequence data; completely overlaps the verified gene BUD5/YCR038C; identified by homology with hemiascomycetous yeast species	NA	NA	NA	NA	NA	NA	NA	NA	NA	NA	NA	NA	NA	NA	no
YCR039C	MATALPHA2	Homeobox-domain protein; with Mcm1p, represses a-specific genes in haploids; acts with A1p to repress transcription of haploid-specific genes in diploids; one of two genes encoded by the MATalpha mating type cassette	1.04643	1.04071	1.15299	0.953321	1.08903	1.20652	0.99758	0.797304	0.838606	0.277219	0.842806	0.622127	0.188228	0.989488	no
YCR040W	MATALPHA1	Transcriptional co-activator that regulates mating-type-specific genes; targets the transcription factor Mcm1p to the promoters of alpha-specific genes; one of two genes encoded by the MATalpha mating type cassette	1	1	1	2.37117	1	1	1.87222	NA	NA	NA	NA	NA	NA	NA	no
YCR041W	NA	Protein of unknown function; overexpression suppresses the high-frequency loss of mini-chromosomes, probably by increasing the rate of proper chromosome segregation; translated gene product of YCR041W, but not its transcript, is responsible for suppression; suppression ability of YCR041W is completely dependent on silencing protein Sir4p	3.54395	0.617108	0.850945	0.554667	2.187	3.01571	1.96572	NA	NA	NA	NA	NA	NA	NA	no
YCR042C	TAF2	TFIID subunit (150 kDa); involved in RNA polymerase II transcription initiation	0.995684	0.997554	0.992405	1.00115	0.993248	0.988121	0.996831	0.976816	0.991848	0.954245	0.995259	0.972369	0.942553	0.981114	no
YCR043C	NA	Putative protein of unknown function; green fluorescent protein (GFP)-fusion protein localizes to the Golgi apparatus; YCR043C is not an essential gene	0.947378	1.1296	1.13277	0.950465	1.07016	1.07316	0.90045	0.71592	0.343603	0.280309	0.804883	0.655236	0.64254	0.413878	no
YCR044C	PER1	Protein of the endoplasmic reticulum; required for GPI-phospholipase A2 activity that remodels the GPI anchor as a prerequisite for association of GPI-anchored proteins with lipid rafts; functionally complemented by human ortholog PERLD1	0.97315	1.02416	1.03126	1.04693	0.996657	1.00357	1.01882	0.84263	0.871605	0.796294	0.789535	0.985316	0.983403	0.896762	no
YCR045C	RRT12	Probable subtilisin-family protease; role in formation of the dityrosine layer of spore walls; localizes to the spore wall and also the nuclear envelope and ER region in mature spores	1.14537	1.00683	0.868024	0.956213	1.1532	0.994206	1.09522	0.263175	0.970307	0.197532	0.825071	0.268698	0.977981	0.486123	no
YCR045W-A	NA	Dubious open reading frame; unlikely to encode a functional protein, based on available experimental and comparative sequence data; completely overlaps with YCR045C; identified by gene-trapping, microarray expression analysis, and genome-wide homology searching	NA	NA	NA	NA	NA	NA	NA	NA	NA	NA	NA	NA	NA	NA	no
YCR046C	IMG1	Mitochondrial ribosomal protein of the large subunit; required for respiration and for maintenance of the mitochondrial genome	1.11536	0.688073	0.829953	0.70634	0.767452	0.925701	0.787826	0.37936	7.95107e-05	0.0720586	0.000592558	0.0134093	0.587823	0.0207275	no
YCR047C	BUD23	Methyltransferase that methylates residue G1575 of 18S rRNA; required for rRNA processing and nuclear export of 40S ribosomal subunits independently of methylation activity; diploid mutant displays random budding pattern; functional homolog of human WBSCR22	0.992408	1.00946	1.11395	1.01952	1.00179	1.1055	1.01178	0.958531	0.94881	0.229382	0.915941	0.991038	0.335701	0.929041	no
YCR047W-A	NA	Dubious open reading frame; unlikely to encode a functional protein, based on available experimental and comparative sequence data; completely overlaps with YCR047C; identified by gene-trapping, microarray expression analysis, and genome-wide homology searching	NA	NA	NA	NA	NA	NA	NA	NA	NA	NA	NA	NA	NA	NA	no
YCR048W	ARE1	Acyl-CoA:sterol acyltransferase; endoplasmic reticulum enzyme that contributes the major sterol esterification activity in the absence of oxygen; ARE1 has a paralog, ARE2, that arose from the whole genome duplication	1.23499	0.86423	0.895958	1.09112	1.06731	1.1065	1.34752	0.0703576	0.253708	0.367075	0.627408	0.685997	0.485966	0.00527959	no
YCR049C	NA	Dubious open reading frame; unlikely to encode a functional protein, based on available experimental and comparative sequence data	0.789572	2.53933	2.28196	2.15105	2.00498	1.80178	1.69841	NA	NA	NA	NA	NA	NA	NA	no
YCR050C	NA	Non-essential protein of unknown function; deletion mutant is synthetically sick or lethal with alpha-synuclein	0.554601	0.240309	1.95017	0.461875	0.133276	1.08157	0.256156	NA	NA	NA	NA	NA	NA	NA	no
YCR051W	NA	Putative protein of unknown function; green fluorescent protein (GFP)-fusion protein localizes to the cytoplasm and nucleus; contains ankyrin (Ank) repeats; YCR051W is not an essential gene	0.927493	1.03719	1.32265	1.12378	0.961988	1.22675	1.0423	0.445677	0.764127	0.000123821	0.253504	0.744737	0.0152659	0.703719	no
YCR052W	RSC6	Component of the RSC chromatin remodeling complex; essential for mitotic growth; RSC6 has a paralog, SNF12, that arose from the whole genome duplication	0.924586	0.978408	1.03481	1.05844	0.904623	0.956775	0.978619	0.337504	0.84465	0.691258	0.611014	0.223797	0.655127	0.829951	no
YCR053W	THR4	Threonine synthase; conserved protein that catalyzes formation of threonine from O-phosphohomoserine; expression is regulated by the GCN4-mediated general amino acid control pathway	1.40546	0.678659	0.801374	1.28306	0.953829	1.1263	1.8033	3.4605e-07	2.39304e-09	0.00129351	0.000550779	0.653531	0.167795	5.40317e-21	Gcn4
YCR054C	CTR86	Essential protein of unknown function; with orthologs in Ashbya gossypii and Candida albicans; similar to human ATXN10, mutations in which cause spinocerebellar ataxia type 10; codon usage corresponds to that observed for yeast genes expressed at low levels; relative distribution to the nucleus increases upon DNA replication stress	1.07113	1.03577	0.946326	1.10629	1.10944	1.01364	1.18498	0.496767	0.772432	0.561857	0.345392	0.299569	0.92675	0.0388461	no
YCR057C	PWP2	Conserved 90S pre-ribosomal component; essential for proper endonucleolytic cleavage of the 35 S rRNA precursor at A0, A1, and A2 sites; contains eight WD-repeats; PWP2 deletion leads to defects in cell cycle and bud morphogenesis	1.15035	1.00073	0.848486	0.968337	1.15119	0.976055	1.11392	0.103663	0.996705	0.0370662	0.839982	0.121738	0.851311	0.22744	no
YCR059C	YIH1	Negative regulator of eIF2 kinase Gcn2p; competes with Gcn2p for binding to Gcn1p; may contribute to regulation of translation in response to starvation via regulation of Gcn2p; binds to monomeric actin and to ribosomes and polyribosomes; ortholog of mammalian IMPACT	1.11721	0.863995	0.862673	1.22331	0.965259	0.963783	1.36668	0.0900245	0.0164335	0.0116001	0.000601865	0.697076	0.682622	6.89308e-09	no
YCR060W	TAH1	Component of conserved R2TP complex (Rvb1-Rvb2-Tah1-Pih1); R2TP complex interacts with Hsp90 (Hsp82p and Hsc82p) to mediate assembly of large protein complexes such as box C/D snoRNPs and RNA polymerase II; contains a single TPR domain with at least two TPR motifs; plays a role in determining prion variants	0.882621	0.978966	0.892369	1.12913	0.864056	0.787623	0.99659	0.319982	0.906848	0.334706	0.4184	0.256847	0.0399445	0.983346	no
YCR061W	NA	Protein of unknown function; green fluorescent protein (GFP)-fusion protein localizes to the cytoplasm in a punctate pattern; induced by treatment with 8-methoxypsoralen and UVA irradiation	1.00111	0.925554	0.874788	0.860456	0.926584	0.875761	0.861413	0.997644	0.678239	0.352227	0.41194	0.684894	0.424928	0.321311	no
YCR063W	BUD31	Component of the SF3b subcomplex of the U2 snRNP; increases efficiency of first and second step pre-mRNA splicing; diploid mutants display a random budding pattern instead of the wild-type bipolar pattern; facilitates passage through G1/S Start, but is not required for G2/M transition or exit from mitosis	1.01238	0.87774	0.714398	1.00203	0.88861	0.723246	1.01444	0.976963	0.738286	0.233704	0.997107	0.770609	0.324488	0.971778	no
YCR064C	NA	Dubious open reading frame; unlikely to encode a functional protein, based on available experimental and comparative sequence data; partially overlaps the verified gene BUD31	6.28651	0.54504	0.720782	1.49401	3.4264	4.5312	9.39211	0.0512725	0.481638	0.678767	0.697756	NA	0.159923	0.0108262	no
YCR065W	HCM1	Forkhead transcription factor; drives S-phase activation of genes involved in chromosome segregation, spindle dynamics, budding; also activates genes involved in respiration, use of alternative energy sources (like proline), NAD synthesis, oxidative stress resistance; key factor in early adaptation to nutrient deficiency and diauxic shift; suppressor of calmodulin mutants with specific SPB assemb…	1.36087	0.907499	0.937347	0.960125	1.23499	1.2756	1.3066	0.000157454	0.34748	0.515397	0.802079	0.0242016	0.00817503	0.0014289	no
YCR066W	RAD18	E3 ubiquitin ligase; forms heterodimer with Rad6p to monoubiquitinate PCNA-K164; heterodimer binds single-stranded DNA and has single-stranded DNA dependent ATPase activity; required for postreplication repair; SUMO-targeted ubiquitin ligase (STUbl) that contains a SUMO-interacting motif (SIM) which stimulates its ubiquitin ligase activity towards the sumoylated form of PCNA	0.906774	1.11896	0.991308	1.14112	1.01464	0.898892	1.03474	0.387225	0.312963	0.949535	0.272947	0.937243	0.367547	0.800838	no
YCR067C	SED4	Integral ER membrane protein that stimulates Sar1p GTPase activity; involved in COPII vesicle budding through disassociation of coat proteins from membranes onto liposomes; binds Sec16p; SED4 has a paralog, SEC12, that arose from the whole genome duplication	0.968165	0.92875	0.907058	0.940148	0.899183	0.878182	0.910218	0.696513	0.303761	0.114092	0.486626	0.125806	0.0508175	0.153496	no
YCR068W	ATG15	Phospholipase; preferentially hydrolyses phosphatidylserine, with minor activity against cardiolipin and phosphatidylethanolamine; required for lysis of autophagic and CVT bodies; targeted to intravacuolar vesicles during autophagy via the multivesicular body (MVB) pathway; required for the maintenance of lipid droplet quantity after the diauxic shift; regulates lipolysis; expression regulated by…	0.918541	0.968773	0.886532	1.01973	0.889857	0.814315	0.936666	0.567901	0.866471	0.348159	0.938503	0.442574	0.124721	0.677517	no
YCR069W	CPR4	Peptidyl-prolyl cis-trans isomerase (cyclophilin); catalyzes the cis-trans isomerization of peptide bonds N-terminal to proline residues; has a potential role in the secretory pathway; CPR4 has a paralog, CPR8, that arose from the whole genome duplication	0.943634	0.909336	0.942637	1.22899	0.858081	0.889504	1.15972	0.591726	0.341525	0.544722	0.015712	0.101164	0.238005	0.0853358	no
YCR071C	IMG2	Mitochondrial ribosomal protein of the large subunit; conserved in metazoa, with similarity to human mitochondrial ribosomal protein MRPL49	1.01881	0.728718	0.744216	0.702635	0.742425	0.758214	0.71585	0.935615	0.0243774	0.0300999	0.0157714	0.0483007	0.0753759	0.015823	no
YCR072C	RSA4	WD-repeat protein involved in ribosome biogenesis; may interact with ribosomes; required for maturation and efficient intra-nuclear transport or pre-60S ribosomal subunits, localizes to the nucleolus	1.19353	0.959436	0.987998	0.96716	1.14511	1.17921	1.15433	0.125595	0.803285	0.936043	0.878499	0.300691	0.186269	0.227329	no
YCR073C	SSK22	MAP kinase kinase kinase of HOG1 mitogen-activated signaling pathway; functionally redundant with Ssk2p; interacts with and is activated by Ssk1p; phosphorylates Pbs2p; SSK22 has a paralog, SSK2, that arose from the whole genome duplication	1.06114	0.97742	1.05671	0.986255	1.03718	1.12132	1.04655	0.676929	0.895872	0.667606	0.956076	0.835158	0.386328	0.761146	no
YCR073W-A	SOL2	Protein with a possible role in tRNA export; shows similarity to 6-phosphogluconolactonase non-catalytic domains but does not exhibit this enzymatic activity; homologous to Sol3p and Sol4p; SOL2 has a paralog, SOL1, that arose from the whole genome duplication	0.974425	0.88649	0.941225	1.11116	0.863818	0.917153	1.08274	0.857453	0.288851	0.600628	0.43853	0.198963	0.492482	0.500404	no
YCR075C	ERS1	Protein involved in cystine transport; localizes to the vacuole, plasma membrane and endosome; similarity to human cystinosin, a H(+)-driven transporter involved in L-cystine export from lysosomes and implicated in the disease cystinosis; contains seven transmembrane domains; mutation is functionally complemented by human CTNS	1.07332	1.11568	1.3785	1.21371	1.19748	1.47957	1.3027	0.745394	0.594921	0.025283	0.337301	0.353863	0.0146362	0.105202	no
YCR075W-A	EGO2	Component of the EGO and GSE complexes; identified by homology to Ashbya gossypii; YCR075W-A has a paralog, YNR034W-A, that arose from the whole genome duplication	1.17749	0.897731	0.696446	1.15473	1.05707	0.820061	1.35969	0.626611	0.77853	0.173029	0.748206	0.906264	0.577036	0.282096	no
YCR076C	FUB1	Proteasome-binding protein; interacts physically with multiple subunits of the 20S proteasome and genetically with genes encoding 20S core particle and 19S regulatory particle subunits; exhibits boundary activity which blocks the propagation of heterochromatic silencing; contains a PI31 proteasome regulator domain and sequence similarity with human PSMF1, a proteasome inhibitor; not an essential …	0.79524	1.09212	1.30341	1.23855	0.868495	1.03652	0.984944	0.0121821	0.458329	0.00172978	0.0294183	0.195794	0.799612	0.91387	no
YCR077C	PAT1	Deadenylation-dependent mRNA-decapping factor; also required for faithful chromosome transmission, maintenance of rDNA locus stability, and protection of mRNA 3'-UTRs from trimming; associated with topoisomerase II; binds to mRNAs under glucose starvation, most often in the 3' UTR; functionally linked to Pab1p; forms cytoplasmic foci upon DNA replication stress; phosphorylation by PKA inhibits P …	1.03439	0.92195	0.975974	0.949618	0.953652	1.00953	0.982271	0.784824	0.460625	0.833017	0.740396	0.706442	0.954754	0.894269	no
YCR079W	PTC6	Mitochondrial type 2C protein phosphatase (PP2C); has similarity to mammalian PP1Ks; involved in mitophagy; null mutant is sensitive to rapamycin and has decreased phosphorylation of the Pda1 subunit of pyruvate dehydrogenase	1.11196	0.957586	0.725689	0.89156	1.0648	0.806939	0.991382	0.333269	0.75618	0.000191619	0.365272	0.638922	0.0396206	0.953255	no
YCR081C-A	NA	Dubious open reading frame; unlikely to encode a functional protein, based on available experimental and comparative sequence data; completely overlaps with SRB8/YCR081W; identified by gene-trapping, microarray expression analysis, and genome-wide homology searching	NA	NA	NA	NA	NA	NA	NA	NA	NA	NA	NA	NA	NA	NA	no
YCR081W	SRB8	Subunit of the RNA polymerase II mediator complex; associates with core polymerase subunits to form the RNA polymerase II holoenzyme; essential for transcriptional regulation; involved in glucose repression	1.00083	0.935099	0.884509	0.942636	0.935878	0.885246	0.943421	0.997644	0.662347	0.296909	0.768384	0.673918	0.371862	0.696415	no
YCR082W	AHC2	Component of the ADA histone acetyltransferase complex; Ahc2p and Ahc1p are unique to the ADA complex and not shared with the related SAGA and SLIK complexes; may tether Ahc1p to the complex	0.751615	1.13754	1.17312	1.10087	0.854993	0.881737	0.827427	0.0126262	0.359366	0.187509	0.606728	0.257783	0.381824	0.124425	no
YCR083W	TRX3	Mitochondrial thioredoxin; highly conserved oxidoreductase required to maintain the redox homeostasis of the cell, forms the mitochondrial thioredoxin system with Trr2p, redox state is maintained by both Trr2p and Glr1p	0.863009	1.01992	1.00524	0.936889	0.880198	0.867532	0.808544	0.125356	0.895013	0.966931	0.671444	0.2344	0.172579	0.0180131	no
YCR084C	TUP1	General repressor of transcription; forms complex with Cyc8p, involved in the establishment of repressive chromatin structure through interactions with histones H3 and H4, appears to enhance expression of some genes	1.04226	0.920605	1.15369	1.01182	0.959513	1.20245	1.05458	0.711596	0.410385	0.0782775	0.947356	0.730915	0.0338691	0.611905	no
YCR085W	NA	Putative protein of unknown function; conserved among S, cerevisiae strains; YCR085W is not an essential gene	0.721741	1.40491	1.35774	0.972479	1.01398	0.979935	0.701878	0.452757	0.442067	0.44303	0.973467	0.985023	0.976529	0.412752	no
YCR086W	CSM1	Nucleolar protein that mediates homolog segregation during meiosis I; forms a complex with Lrs4p and then Mam1p at kinetochores; required for condensin recruitment to the replication fork barrier site and rDNA repeat segregation	0.856171	1.20149	1.07842	0.980243	1.02869	0.923308	0.839256	0.192274	0.110505	0.551227	0.93217	0.879386	0.589573	0.133327	no
YCR087C-A	NA	Putative protein of unknown function; green fluorescent protein (GFP)-fusion protein localizes to the nucleolus; YCR087C-A is not an essential gene	NA	NA	NA	NA	NA	NA	NA	NA	NA	NA	NA	NA	NA	NA	no
YCR087W	NA	Dubious open reading frame; unlikely to encode a functional protein, based on available experimental and comparative sequence data; partially overlaps uncharacterized gene YCR087C-A; YCR087W is not an essential gene	0.405385	1	1	1	0.500126	0.461187	0.49352	NA	NA	NA	NA	NA	NA	NA	no
YCR088W	ABP1	Actin-binding protein of the cortical actin cytoskeleton; important for activation of the Arp2/3 complex that plays a key role actin in cytoskeleton organization; inhibits barbed-end actin filament elongation; phosphorylation within its Proline-Rich Regio, mediated by Cdc28p and Pho85p, protects Abp1p from proteolysis mediated by its own PEST sequences; mammalian homolog of HIP-55 (hematopoietic …	0.861833	0.820596	1.23036	0.992547	0.707217	1.06036	0.85541	0.0487509	0.00566498	0.00212029	0.967101	2.09297e-07	0.548143	0.0343607	no
YCR089W	FIG2	Cell wall adhesin, expressed specifically during mating; may be involved in maintenance of cell wall integrity during mating; FIG2 has a paralog, AGA1, that arose from the whole genome duplication	1.64857	0.796953	0.898986	1.176	1.31383	1.48204	1.93872	4.86072e-09	0.0138387	0.286428	0.123556	0.00651568	2.88099e-05	9.70985e-16	no
YCR090C	NA	Putative protein of unknown function; green fluorescent protein (GFP)-fusion protein localizes to the cytoplasm and nucleus; YCR090C is not an essential gene	0.914033	1.17979	1.11127	1.04475	1.07836	1.01574	0.954938	0.453728	0.115165	0.320381	0.816851	0.576651	0.928658	0.735244	no
YCR091W	KIN82	Putative serine/threonine protein kinase; implicated in the regulation of phospholipid asymmetry through the activation of phospholipid translocases (flippases); involved in the phosphorylation of upstream inhibitory kinase Ypk1p along with Fpk1p; has a redundant role in the cellular response to mating pheromone; KIN82 has a paralog, FPK1, that arose from the whole genome duplication	0.929773	1.06662	0.992392	0.889358	0.991716	0.9227	0.826901	0.710838	0.764392	0.969805	0.618497	0.979924	0.701708	0.246889	no
YCR092C	MSH3	Mismatch repair protein; forms dimers with Msh2p that mediate repair of insertion or deletion mutations and removal of nonhomologous DNA ends, contains a PCNA (Pol30p) binding motif required for genome stability	0.882795	1.00673	1.11143	1.041	0.888737	0.981164	0.918987	0.168141	0.963984	0.224165	0.797604	0.234864	0.891526	0.387805	no
YCR093W	CDC39	Subunit of the CCR4-NOT1 core complex; this complex has multiple roles in the regulation of mRNA levels including regulation of transcription and destabilization of mRNA by deadenylation; basal transcription factor that increases initiation and elongation; activates the ATPase activity of Dhh1p, resulting in processing body disassembly	1.16187	1.00062	0.845453	0.936872	1.16258	0.982304	1.08852	0.0981678	0.996705	0.0449607	0.643685	0.116591	0.904094	0.400649	no
YCR094W	CDC50	Endosomal protein that interacts with phospholipid flippase Drs2p; interaction with Cdc50p is essential for Drs2p catalytic activity; mutations affect cell polarity and polarized growth; similar to Lem3p; CDC50 has a paralog, YNR048W, that arose from the whole genome duplication	0.893043	1.02469	1.10616	1.07705	0.915088	0.987852	0.961848	0.209501	0.851073	0.236971	0.547534	0.389635	0.93233	0.727141	no
YCR095C	OCA4	Cytoplasmic protein required for replication of Brome mosaic virus; S, cerevisiae is a model system for studying replication of positive-strand RNA viruses in their natural hosts	0.853276	1.28281	1.21644	1.02152	1.09459	1.03796	0.87164	0.0791764	0.00192821	0.0161453	0.907485	0.404738	0.776279	0.14168	no
YCR095W-A	NA	Putative protein of unknown function	0.753771	1.4258	1.22974	1.92472	1.07473	0.926945	1.4508	0.647832	0.564435	0.722668	0.264155	0.935468	0.926841	0.504194	no
YCR096C	HMRA2	Silenced copy of a2 at HMR; similarity to Alpha2p; required along with a1p for inhibiting expression of the HO endonuclease in a/alpha HO/HO diploid cells with an active mating-type interconversion system	1.25741	0.945505	1.0908	1.0147	1.18889	1.37158	1.27589	0.164654	0.809452	0.624946	0.96808	0.365212	0.0546379	0.133027	no
YCR097W	HMRA1	Silenced copy of a1 at HMR; homeobox corepressor that interacts with Alpha2p to repress haploid-specific gene transcription in diploid cells	0.970386	1.02493	1.11843	0.832207	0.994581	1.08531	0.807562	0.823862	0.869341	0.255864	0.081821	0.979619	0.4968	0.0228822	no
YCR097W-A	NA	Dubious open reading frame; unlikely to encode a functional protein, based on available experimental and comparative sequence data; identified by homology to a hemiascomycetous yeast protein	2.64438	1.02026	0.339686	0.768394	2.69796	0.898261	2.03193	NA	NA	NA	NA	NA	NA	NA	no
YCR098C	GIT1	Plasma membrane permease; mediates uptake of glycerophosphoinositol and glycerophosphocholine as sources of the nutrients inositol and phosphate; expression and transport rate are regulated by phosphate and inositol availability	0.858112	2.56268	1.32376	0.794058	2.19906	1.13593	0.68139	0.468087	2.28122e-11	0.0992337	0.327963	7.53197e-08	0.581138	0.0311735	no
YCR099C	NA	Putative protein of unknown function	0.946685	0.938406	1.00687	1.55695	0.888375	0.953185	1.47394	0.824579	0.814064	0.976522	0.00732767	0.63031	0.863222	0.0173985	no
YCR100C	NA	Putative protein of unknown function	1.21312	1.01701	0.856898	1.34225	1.23376	1.03952	1.62832	0.216711	0.942017	0.299784	0.0375246	0.206428	0.869499	0.000120293	no
YCR101C	NA	Putative protein of unknown function; localizes to the membrane fraction; YCR101C is not an essential gene	1.33776	0.798455	1.0312	1.46348	1.06814	1.3795	1.95779	0.147759	0.291781	0.896041	0.0352544	0.836492	0.128231	4.70597e-05	no
YCR102C	NA	Putative protein of unknown function; involved in copper metabolism; similar to C, carbonum toxD gene; member of the quinone oxidoreductase family	0.469414	1.76845	2.07367	1.23373	0.830133	0.973411	0.57913	1.18737e-06	0.000406573	2.11688e-06	0.39753	0.378846	0.92811	0.000675927	no
YCR102W-A	NA	Dubious open reading frame; unlikely to encode a functional protein, based on available experimental and comparative sequence data	0.490332	4.20467	5.45772	1.21205	2.06168	2.67609	0.594305	0.585381	0.176754	0.0714494	0.933562	NA	0.36485	0.701973	no
YCR104W	PAU3	Member of the seripauperin multigene family; encoded mainly in subtelomeric region; active during alcoholic fermentation; regulated by anaerobiosis; negatively regulated by oxygen; repressed by heme	1.14043	0.849077	3.18437	0.662055	0.968316	3.63156	0.75503	0.886511	0.864033	0.0191229	0.697565	NA	0.0260755	0.754188	no
YCR105W	ADH7	NADPH-dependent medium chain alcohol dehydrogenase; has broad substrate specificity; member of the cinnamyl family of alcohol dehydrogenases; may be involved in fusel alcohol synthesis or in aldehyde tolerance	0.932062	1.07361	1.4831	0.937106	1.00067	1.38234	0.873441	0.675008	0.692395	0.000327773	0.783261	0.997856	0.0107124	0.361975	no
YCR106W	RDS1	Putative zinc cluster transcription factor; involved in conferring resistance to cycloheximide	1.23399	1.06062	0.913479	1.13997	1.30879	1.12722	1.40671	0.0107454	0.58901	0.306663	0.172142	0.00109619	0.238399	6.41862e-06	Gcn4
YCR107W	AAD3	Putative aryl-alcohol dehydrogenase; similar to P, chrysosporium aryl-alcohol dehydrogenase; mutational analysis has not yet revealed a physiological role; AAD3 has a paralog, AAD15, that arose from a segmental duplication; members of the AAD gene family comprise three pairs (AAD3 + AAD15, AAD6/AAD16 + AAD4, AAD10 + AAD14) whose two genes are more related to one another than to other members of t…	1.00596	0.982362	1.0573	1.38156	0.988214	1.0636	1.38979	0.973835	0.91715	0.658146	0.00121004	0.954599	0.68106	0.000597566	Gcn4
YCR108C	NA	Putative protein of unknown function; identified by fungal homology and RT-PCR	0.127968	0.63977	3.2515	0.631312	0.0818699	0.416087	0.0807875	NA	NA	NA	NA	NA	NA	NA	no
YDL001W	RMD1	Cytoplasmic protein required for sporulation	1.05597	1.07773	0.915552	0.869815	1.13805	0.966791	0.918495	0.630197	0.485849	0.341019	0.175444	0.196391	0.801664	0.413878	no
YDL002C	NHP10	Non-essential INO80 chromatin remodeling complex subunit; preferentially binds DNA ends, protecting them from exonucleatic cleavage; deletion affects telomere maintenance via recombination; related to mammalian high mobility group proteins	0.811302	1.05192	1.10559	1.08802	0.853426	0.896966	0.882715	0.0313866	0.722295	0.339988	0.575562	0.150629	0.358515	0.242963	no
YDL003W	MCD1	Essential alpha-kleisin subunit of the cohesin complex; required for sister chromatid cohesion in mitosis and meiosis; apoptosis induces cleavage and translocation of a C-terminal fragment to mitochondria; expression peaks in S phase	0.958222	1.11006	0.898981	0.856301	1.06368	0.861423	0.820526	0.798226	0.481594	0.414989	0.314414	0.716018	0.291251	0.109758	no
YDL004W	ATP16	Delta subunit of the central stalk of mitochondrial F1F0 ATP synthase; F1F0 ATP synthase is a large, evolutionarily conserved enzyme complex required for ATP synthesis; F1 translationally regulates ATP6 and ATP8 expression to achieve a balanced output of ATP synthase genes encoded in nucleus and mitochondria; phosphorylated	0.925278	1.21407	1.23821	0.88345	1.12335	1.14569	0.817437	0.741902	0.333869	0.229579	0.658767	0.620898	0.544175	0.286855	no
YDL005C	MED2	Subunit of the RNA polymerase II mediator complex; associates with core polymerase subunits to form the RNA polymerase II holoenzyme; essential for transcriptional regulation; relocalizes to the cytosol in response to hypoxia	0.974625	1.21045	1.13691	1.06809	1.17973	1.10806	1.04099	0.803599	0.00457677	0.0668551	0.542289	0.0274287	0.224511	0.67797	no
YDL006W	PTC1	Type 2C protein phosphatase (PP2C); dephosphorylates Hog1p, inactivating osmosensing MAPK cascade; involved in Fus3p activation during pheromone response; deletion affects precursor tRNA splicing, mitochondrial inheritance, and sporulation	0.953085	1.17688	0.99708	1.14002	1.12167	0.950302	1.08654	0.749635	0.166106	0.983633	0.365601	0.397257	0.755552	0.532252	no
YDL007C-A	NA	Putative protein of unknown function	0.153452	2.40289	5.75395	2.37119	0.368729	0.882955	0.363864	NA	NA	NA	NA	NA	NA	NA	no
YDL007W	RPT2	ATPase of the 19S regulatory particle of the 26S proteasome; one of six ATPases of the regulatory particle; involved in the degradation of ubiquitinated substrates; required for normal peptide hydrolysis by the core 20S particle; N-myristoylation of Rpt2p at Gly2 is involved in regulating the proper intracellular distribution of proteasome activity by controlling the nuclear localization of the 2…	0.67005	1.19026	1.31681	0.996656	0.797535	0.882326	0.667809	2.31012e-08	0.0338092	0.000186656	0.984895	0.00512014	0.180204	1.23017e-08	no
YDL008W	APC11	Catalytic core subunit, Anaphase-Promoting Complex/Cyclosome (APC/C); which is a ubiquitin-protein ligase required for degradation of anaphase inhibitors, including mitotic cyclins, during the metaphase/anaphase transition; contains a RING-H2 domain that is required for activity	0.662215	1.24647	1.50511	0.966795	0.82543	0.996708	0.640226	3.87068e-09	0.00429707	3.0361e-09	0.836935	0.0193485	0.982234	2.80099e-10	no
YDL009C	NA	Protein of unknown function; mRNA identified as translated by ribosome profiling data; SWAT-GFP and mCherry fusion proteins localize to the cytosol; partially overlaps the verified ORF YDL010W; YDL009C is not an essential gene	1.0946	0.984303	1.14133	0.939327	1.07742	1.2493	1.02819	0.861699	0.982197	0.754818	0.932351	0.9071	0.646704	0.959611	no
YDL010W	GRX6	Cis-golgi localized monothiol glutaredoxin, binds Fe-S cluster; more similar in activity to dithiol than other monothiol glutaredoxins; involved in the oxidative stress response; GRX6 has a paralog, GRX7, that arose from the whole genome duplication	0.774145	1.22694	1.60364	1.32926	0.949828	1.24145	1.02904	0.561096	0.676514	0.175564	0.60174	0.938563	0.646704	0.957153	no
YDL011C	NA	Dubious open reading frame; unlikely to encode a functional protein, based on available experimental and comparative sequence data; overlaps the uncharacterized ORF YDL010W	0.203115	2.57599	3.83513	2.30927	0.523224	0.778973	0.469047	NA	NA	NA	NA	NA	NA	NA	no
YDL012C	NA	Tail-anchored plasma membrane protein with a conserved CYSTM module; possibly involved in response to stress; may contribute to non-homologous end-joining (NHEJ) based on ydl012c htz1 double null phenotype; YDL012C has a paralog, YBR016W, that arose from the whole genome duplication	0.82455	1.10436	1.27293	1.09156	0.9106	1.04959	0.900044	0.0798328	0.454513	0.0156388	0.600891	0.501462	0.759667	0.393166	no
YDL013W	SLX5	Subunit of the Slx5-Slx8 SUMO-targeted Ub ligase (STUbL) complex; role in Ub-mediated degradation of histone variant Cse4p preventing mislocalization to euchromatin; role in proteolysis of spindle positioning protein Kar9p, and DNA repair proteins Rad52p and Rad57p; forms SUMO-dependent nuclear foci, including DNA repair centers; contains a RING domain and two SIM motifs; associates with the cent…	1.02265	0.996809	1.03969	1.04271	1.01938	1.06323	1.06633	0.838163	0.983714	0.662259	0.754436	0.884272	0.536366	0.47878	no
YDL014W	NOP1	Histone glutamine methyltransferase, modifies H2A at Q105 in nucleolus; component of the small subunit processome complex, which is required for processing of pre-18S rRNA; ortholog of mammalian fibrillarin; inviability of the null mutant is functionally complemented by human FBL	1.05137	1.04406	1.01916	1.09757	1.09769	1.07151	1.15395	0.602709	0.68021	0.846578	0.345927	0.295171	0.46254	0.0558647	no
YDL015C	TSC13	Enoyl reductase; catalyzes last step in each cycle of very long chain fatty acid elongation; localizes to ER, highly enriched in a structure marking nuclear-vacuolar junctions; coimmunoprecipitates with elongases Elo2p and Elo3p; protein increases in abundance and relative distribution to ER foci increases upon DNA replication stress; human homolog TECR implicated in nonsyndromic mental retardati…	0.972656	0.99861	1.19984	1.12693	0.971304	1.16704	1.09612	0.698004	0.992156	0.000102513	0.0308821	0.703029	0.00358347	0.094304	no
YDL016C	NA	Dubious open reading frame; unlikely to encode a functional protein, based on available experimental and comparative sequence data; partially overlaps the verified ORF CDC7/YDL153C, the catalytic subunit of a complex that regulates DNA replication	0.846252	0.908138	0.955112	1.43381	0.768514	0.808265	1.21336	0.809862	0.90525	0.947208	0.6473	0.705957	0.771124	0.771915	no
YDL017W	CDC7	DDK (Dbf4-dependent kinase) catalytic subunit; required for origin firing and replication fork progression in mitotic S phase through phosphorylation of Mcm2-7p complexes and Cdc45p; kinase activity correlates with cyclical DBF4 expression; required for pre-meiotic DNA replication, meiotic DSB formation, recruitment of monopolin complex to kinetochores during meiosis I, regulation of meiosis-spec…	0.854947	1.09785	1.02829	0.941281	0.938603	0.87913	0.804745	0.199101	0.515	0.849625	0.769378	0.688463	0.341973	0.0577011	no
YDL018C	ERP3	Protein with similarity to Emp24p and Erv25p; member of the p24 family involved in ER to Golgi transport	0.812041	1.03429	1.01245	1.03587	0.839889	0.822153	0.841166	0.246631	0.898782	0.957764	0.918324	0.384748	0.309129	0.345465	no
YDL019C	OSH2	Member of an oxysterol-binding protein family with seven members; in S, cerevisiae, family members have overlapping, redundant functions in sterol metabolism and collectively perform a function essential for viability; contains FFAT motif; interacts with ER anchor Scs2p at patches at the plasma membrane and at the nuclear envelope; regulated by sterol binding; OSH2 has a paralog, SWH1, that arose…	0.958607	0.907414	0.8307	1.10545	0.869853	0.796315	1.05969	0.729532	0.363907	0.0309517	0.411343	0.174678	0.0148834	0.609375	no
YDL020C	RPN4	Transcription factor that stimulates expression of proteasome genes; Rpn4p levels are in turn regulated by the 26S proteasome in a negative feedback control mechanism; RPN4 is transcriptionally regulated by various stress responses; relative distribution to the nucleus increases upon DNA replication stress	0.961238	0.940253	0.863163	0.929852	0.903807	0.829705	0.89381	0.780846	0.661686	0.15248	0.662138	0.43071	0.0947131	0.325267	no
YDL021W	GPM2	Homolog of Gpm1p phosphoglycerate mutase; converts 3-phosphoglycerate to 2-phosphoglycerate in glycolysis; may be non-functional; GPM2 has a paralog, GPM3, that arose from the whole genome duplication	0.708304	0.58689	0.9029	0.862788	0.415696	0.639528	0.611116	0.215336	0.0579645	0.752075	0.755107	0.000742838	0.118311	0.0609681	no
YDL022C-A	NA	Protein of unknown function; SWAT-GFP and mCherry fusion proteins localize to the cytosol; partially overlaps the verified gene DIA3; identified by fungal homology and RT-PCR; mRNA identified as translated by ribosome profiling data	1.40222	0.694673	1.13857	2.49707	0.974087	1.59653	3.50145	NA	NA	NA	NA	NA	NA	NA	no
YDL022W	GPD1	NAD-dependent glycerol-3-phosphate dehydrogenase; key enzyme of glycerol synthesis, essential for growth under osmotic stress; expression regulated by high-osmolarity glycerol response pathway; protein abundance increases in response to DNA replication stress; constitutively inactivated via phosphorylation by the protein kinases Ypk1p and Ypk2p, dephosphorylation increases catalytic activity; for…	0.740384	1.07075	0.911227	1.02037	0.792768	0.674658	0.755468	0.0766656	0.784328	0.640319	0.959029	0.225539	0.0220941	0.100378	no
YDL023C	NA	Dubious open reading frame; unlikely to encode a functional protein, based on available experimental and comparative sequence data; not conserved in other Saccharomyces species; overlaps the verified gene GPD1; deletion confers sensitivity to GSAO; deletion in cyr1 mutant results in loss of stress resistance	1.53787	0.633426	1.09917	1.21741	1	1.69037	1.87222	NA	NA	NA	NA	NA	NA	NA	no
YDL024C	DIA3	Protein of unknown function; involved in invasive and pseudohyphal growth	0.99901	1.69163	1.25614	0.720329	1.68996	1.25489	0.719616	0.998764	0.0400009	0.42855	0.378184	0.0579712	0.502885	0.290962	no
YDL025C	RTK1	Putative protein kinase, potentially phosphorylated by Cdc28p; interacts with ribosome biogenesis factors, Cka2, Gus1 and Arc1; protein abundance increases in response to DNA replication stress	1.38768	0.61719	0.700281	1.62777	0.856462	0.971765	2.25883	0.0016385	8.08707e-07	0.000348284	4.68301e-07	0.252041	0.876267	4.67402e-19	Gcn4
YDL025W-A	NA	Dubious open reading frame; unlikely to encode a functional protein, based on available experimental and comparative sequence data; completely overlaps the ORF YDL025C; identified by gene-trapping, microarray expression analysis, and genome-wide homology searching	NA	NA	NA	NA	NA	NA	NA	NA	NA	NA	NA	NA	NA	NA	no
YDL026W	NA	Dubious open reading frame; unlikely to encode a functional protein, based on available experimental and comparative sequence data	1.53787	2.38671	3.96872	1.21741	3.67045	6.10337	1.87222	NA	NA	NA	NA	NA	NA	NA	no
YDL027C	MRX9	Protein that associates with mitochondrial ribosome; the authentic, non-tagged protein is detected in highly purified mitochondria in high-throughput studies; YDL027C is not an essential gene	0.8664	1.08756	1.12755	0.687228	0.942261	0.976908	0.595414	0.394928	0.674062	0.448898	0.012472	0.784724	0.924881	0.000107925	no
YDL028C	MPS1	Dual-specificity kinase; autophosphorylation required for function; required for spindle pole body (SPB) duplication and spindle checkpoint function; contributes to bi-orientation by promoting formation of force-generating kinetochore-microtubule attachments in meiosis I; substrates include SPB proteins Spc42p, Spc110p, and Spc98p, mitotic exit network protein Mob1p, kinetochore protein Cnn1p, an…	0.998719	1.14441	0.89562	1.03536	1.14294	0.894473	1.03403	0.995161	0.135625	0.215081	0.832591	0.170298	0.281216	0.781492	no
YDL029W	ARP2	Essential component of the Arp2/3 complex; Arp2/3 is a highly conserved actin nucleation center required for the motility and integrity of actin patches; involved in endocytosis and membrane growth and polarity; required for efficient Golgi-to-ER trafficking in COPI mutants	0.761336	1.05408	1.33175	1.0062	0.802508	1.01391	0.766057	8.20561e-07	0.513697	1.2427e-07	0.967721	0.000170055	0.892986	1.36682e-06	no
YDL030W	PRP9	Subunit of the SF3a splicing factor complex; required for spliceosome assembly; acts after the formation of the U1 snRNP-pre-mRNA complex	0.944125	1.12273	1.05426	1.06573	1.06	0.995351	1.00618	0.596851	0.215701	0.593003	0.642708	0.618199	0.976895	0.963025	no
YDL031W	DBP10	Putative ATP-dependent RNA helicase of the DEAD-box protein family; constituent of 66S pre-ribosomal particles; essential protein involved in ribosome biogenesis	1.01971	0.94106	1.109	0.973657	0.95961	1.13086	0.992851	0.906831	0.68638	0.369313	0.902621	0.802785	0.337134	0.964503	no
YDL032W	NA	Dubious open reading frame; unlikely to encode a functional protein, based on available experimental and comparative sequence data; partially overlaps verified gene SLM3/YDL033C; YDL032W is not an essential gene	0.405385	1	1	1	0.500128	0.461187	0.49352	NA	NA	NA	NA	NA	NA	NA	no
YDL033C	SLM3	tRNA-specific 2-thiouridylase; responsible for 2-thiolation of the wobble base of mitochondrial tRNAs; human homolog TRMU is implicated in myoclonus epilepsy associated with ragged red fibers (MERRF), and can complement yeast null mutant	1.01854	0.907931	0.898497	0.961294	0.924766	0.915157	0.979118	0.912468	0.471763	0.352227	0.848205	0.600499	0.528337	0.898169	no
YDL034W	NA	Dubious open reading frame; unlikely to encode a functional protein, based on available experimental and comparative sequence data; partially overlaps with verified gene GPR1/YDL035C; YDL034W is not an essential gene	3.18359	0.857571	0.445818	1.62784	2.73016	1.4193	5.18237	NA	NA	NA	NA	NA	NA	NA	no
YDL035C	GPR1	Plasma membrane G protein coupled receptor (GPCR); interacts with the heterotrimeric G protein alpha subunit, Gpa2p, and with Plc1p; sensor that integrates nutritional signals with the modulation of cell fate via PKA and cAMP synthesis	1.27567	0.831591	0.730961	1.24042	1.06084	0.932468	1.58237	0.00221581	0.0261261	2.82353e-05	0.00902302	0.619897	0.5369	1.82379e-10	no
YDL036C	PUS9	Mitochondrial tRNA:pseudouridine synthase; catalyzes the formation of pseudouridine at position 32 in mitochondrial tRNAs; contains an N-terminal mitochondrial targeting sequence; PUS9 has a paralog, RIB2, that arose from the whole genome duplication	0.946117	1.11785	1.02878	1.09488	1.05761	0.973345	1.03588	0.704514	0.39101	0.8404	0.588701	0.719171	0.87761	0.818505	no
YDL037C	BSC1	Protein of unconfirmed function; similar to cell surface flocculin Flo11p; ORF exhibits genomic organization compatible with a translational readthrough-dependent mode of expression; in W303 strain one continuous open reading frame comprising of YDL037C, the intergenic region and YDL039C encodes the gene IMI1	0.708086	1.52867	1.02826	1.02534	1.08243	0.728098	0.726027	0.229044	0.123284	0.938796	0.968163	0.852387	0.302734	0.259896	no
YDL039C	PRM7	Pheromone-regulated protein; predicted to have one transmembrane segment; promoter contains Gcn4p binding elements; in W303 strain one continuous open reading frame comprising of YDL037C, the intergenic region and YDL039C encodes the IMI1	0.771783	1.5149	1.15478	1.02954	1.16917	0.891241	0.794578	0.479972	0.217267	0.698029	0.968163	0.718695	0.802058	0.530903	no
YDL040C	NAT1	Subunit of protein N-terminal acetyltransferase NatA; NatA comprised of Nat1p, Ard1p, and Nat5p; N-terminally acetylates many proteins to influence multiple processes such as cell cycle progression, heat-shock resistance, mating, sporulation, telomeric silencing and early stages of mitophagy; orthologous to human NAA15; expression of both human NAA10 and NAA15 functionally complements ard1 nat1 d…	0.958044	0.993477	1.04767	1.0433	0.951795	1.00372	0.999527	0.608241	0.953134	0.529494	0.699257	0.574207	0.976529	0.996128	no
YDL041W	NA	Dubious open reading frame; unlikely to encode a functional protein, based on available experimental and comparative sequence data; overlaps the verified gene SIR2/YDL042C	0.405384	4.52848	1	2.37118	1.83577	0.461187	0.961237	NA	NA	NA	NA	NA	NA	NA	no
YDL042C	SIR2	Conserved NAD+ dependent histone deacetylase of the Sirtuin family; deacetylation targets are primarily nuclear proteins; required for telomere hypercluster formation in quiescent yeast cells; involved in regulation of lifespan; plays roles in silencing at HML, HMR, telomeres, and rDNA; negatively regulates initiation of DNA replication; functions as regulator of autophagy like mammalian homolog …	0.690606	1.58459	1.5652	1.14069	1.09432	1.08094	0.787768	0.0023906	6.12765e-05	8.82951e-05	0.484831	0.606236	0.661867	0.0703809	no
YDL043C	PRP11	Subunit of the SF3a splicing factor complex; required for spliceosome assembly	0.887652	1.35187	1.2296	1.21312	1.19999	1.09146	1.07683	0.36222	0.00362769	0.0546099	0.126729	0.142184	0.550833	0.597202	no
YDL044C	MTF2	Mitochondrial protein that interacts with mitochondrial RNA polymerase; interacts with an N-terminal region of mitochondrial RNA polymerase (Rpo41p) and couples RNA processing and translation to transcription	1.0391	0.878289	0.901315	0.868816	0.912628	0.936554	0.902785	0.81981	0.355999	0.42457	0.378495	0.575881	0.701708	0.475939	no
YDL045C	FAD1	Flavin adenine dinucleotide (FAD) synthetase; performs the second step in synthesis of FAD from riboflavin; mutation is functionally complemented by human FLAD1	0.703528	1.27279	1.17448	1.11937	0.895443	0.826279	0.787511	4.37914e-05	0.0084889	0.0912815	0.393066	0.339161	0.062927	0.00896238	no
YDL045W-A	MRP10	Mitochondrial ribosomal protein of the small subunit; contains twin cysteine-x9-cysteine motifs; oxidized by Mia40p during import into mitochondria	1.00018	0.800308	0.809299	0.938204	0.800451	0.809444	0.938372	0.999372	0.223422	0.211814	0.840623	0.246547	0.276948	0.779714	no
YDL046W	NPC2	Sterol transport protein and functional homolog of human NPC2/He1; human NPC2 is a cholesterol-binding protein whose deficiency causes Niemann-Pick type C2 disease involving retention of cholesterol in lysosomes; yeast NPC2 can complement mutations in human NPC2	0.928899	1.18303	0.966807	0.957399	1.09892	0.898066	0.889327	0.605495	0.162195	0.813832	0.839953	0.515865	0.439091	0.350606	no
YDL047W	SIT4	Ceramide-activated, type 2A-related serine-threonine phosphatase; functions in G1/S transition of mitotic cycle; controls lifespan, mitochondrial function, cell cycle progression by regulating HXK2 phosphorylation; regulator of COPII coat dephosphorylation; required for ER to Golgi traffic; interacts with Hrr25p kinase; cytoplasmic and nuclear protein that modulates functions mediated by Pkc1p in…	1.00932	0.949056	0.83239	1.01872	0.957904	0.840151	1.02821	0.93499	0.568416	0.00451796	0.897222	0.658811	0.0170679	0.774065	no
YDL048C	STP4	Protein containing a Kruppel-type zinc-finger domain; similar to Stp1p, Stp2p; predicted transcription factor; relative distribution to the nucleus increases upon DNA replication stress; STP4 has a paralog, STP3, that arose from the whole genome duplication	0.578772	1.95187	1.15487	1.15301	1.12969	0.668409	0.66733	0.0500616	0.0112854	0.664078	0.776305	0.765205	0.202091	0.165157	no
YDL049C	KNH1	Protein with similarity to Kre9p; Kre9p is involved in cell wall beta 1,6-glucan synthesis; overproduction suppresses growth defects of a kre9 null mutant; required for propionic acid resistance	0.964248	0.750453	0.687338	0.937968	0.723623	0.662765	0.904434	0.884482	0.109276	0.0195108	0.841002	0.0827798	0.0219496	0.643989	no
YDL050C	NA	Dubious open reading frame; unlikely to encode a functional protein, based on available experimental and comparative sequence data	0.802227	1.69676	0.242272	0.963046	1.36119	0.194358	0.772582	NA	0.693144	0.283935	NA	NA	0.267126	0.860399	no
YDL051W	LHP1	RNA binding protein required for maturation of tRNA and U6 snRNA; acts as a molecular chaperone for RNAs transcribed by polymerase III; homologous to human La (SS-B) autoantigen	0.969592	1.0881	1.15894	0.970554	1.05501	1.1237	0.941041	0.808993	0.442981	0.0948782	0.865276	0.66818	0.27033	0.586812	no
YDL052C	SLC1	1-acyl-sn-glycerol-3-phosphate acyltransferase; catalyzes the acylation of lysophosphatidic acid to form phosphatidic acid, a key intermediate in lipid metabolism; enzymatic activity detected in lipid particles and microsomes	1.03727	0.928755	0.908931	1.00437	0.963372	0.942809	1.04181	0.700586	0.385494	0.189413	0.977968	0.716018	0.524996	0.660251	no
YDL053C	PBP4	Pbp1p binding protein; interacts strongly with Pab1p-binding protein 1 (Pbp1p) in the yeast two-hybrid system; also interacts with Lsm12p in a copurification assay; relative distribution to the nucleus increases upon DNA replication stress	0.908719	0.985236	1.16	1.18533	0.895302	1.05411	1.07713	0.328212	0.914488	0.0733435	0.0635689	0.27369	0.656458	0.457484	no
YDL054C	MCH1	Protein with similarity to mammalian monocarboxylate permeases; monocarboxylate permeases are involved in transport of monocarboxylic acids across the plasma membrane but mutant is not deficient in monocarboxylate transport	2.00706	0.469961	0.513346	1.67861	0.943241	1.03032	3.36907	4.27405e-11	3.73374e-13	2.25555e-10	2.06429e-06	0.752424	0.884617	7.4671e-34	Gcn4
YDL055C	PSA1	GDP-mannose pyrophosphorylase (mannose-1-phosphate guanyltransferase); synthesizes GDP-mannose from GTP and mannose-1-phosphate in cell wall biosynthesis; required for normal cell wall structure	1.05006	1.00838	0.952914	0.922321	1.05886	1.00061	0.968491	0.534109	0.935425	0.505325	0.328244	0.483277	0.996397	0.703719	no
YDL056W	MBP1	Transcription factor; involved in regulation of cell cycle progression from G1 to S phase, forms a complex with Swi6p that binds to MluI cell cycle box regulatory element in promoters of DNA synthesis genes	1.078	1.05011	0.913734	0.988471	1.13202	0.985002	1.06557	0.446371	0.663771	0.29868	0.947356	0.188789	0.915074	0.528673	no
YDL057W	NA	Putative protein of unknown function; YDL057W is not an essential gene	0.649466	1.09769	1.27357	1.05713	0.712911	0.82714	0.686568	0.00385366	0.681215	0.129162	0.863114	0.0417944	0.306007	0.0141224	no
YDL058W	USO1	Essential protein involved in vesicle-mediated ER to Golgi transport; binds membranes and functions during vesicle docking to the Golgi; required for assembly of the ER-to-Golgi SNARE complex	1.00936	1.04161	0.852982	0.989262	1.05136	0.860965	0.998521	0.950702	0.760851	0.0745756	0.960244	0.697117	0.14669	0.991506	no
YDL059C	RAD59	Protein involved DNA double-strand break repair; repairs breaks in DNA during vegetative growth via recombination and single-strand annealing; anneals complementary single-stranded DNA; forms nuclear foci upon DNA replication stress; required for loading of Rad52p to DSBs; regulates replication fork progression in DNA ligase I-deficient cells; paralog of Rad52p	0.747167	1.25443	1.07493	0.812351	0.937267	0.803156	0.606962	0.122141	0.266439	0.745915	0.416192	0.817579	0.303596	0.00391964	no
YDL060W	TSR1	Protein required for processing of 20S pre-rRNA in the cytoplasm; associates with pre-40S ribosomal particles; inhibits the premature association of 60S subunits with assembling 40S subunits in the cytoplasm; similar to Bms1p; relocalizes from nucleus to cytoplasm upon DNA replication stress	1.05493	0.977017	1.03665	0.995894	1.03068	1.09359	1.0506	0.733349	0.901532	0.807386	0.986811	0.876511	0.554756	0.754618	no
YDL061C	RPS29B	Protein component of the small (40S) ribosomal subunit; homologous to mammalian ribosomal protein S29 and bacterial S14; RPS29B has a paralog, RPS29A, that arose from the whole genome duplication	0.799735	1.0981	0.85558	1.20545	0.878192	0.684237	0.964038	0.609164	0.861625	0.708407	0.758493	0.803709	0.353925	0.944099	no
YDL062W	NA	Dubious open reading frame; unlikely to encode a functional protein, based on available experimental and comparative sequence data; partially overlaps uncharacterized ORF YDL063C; YDL062W is not essential	0.277695	1.23369	4.28769	2.29989	0.342591	1.19067	0.638669	NA	NA	NA	NA	NA	NA	NA	no
YDL063C	SYO1	Transport adaptor or symportin; facilitates synchronized nuclear coimport of the two 5S-rRNA binding proteins Rpl5p and Rpl11p; binds to nascent Rpl5p during translation; required for biogenesis of the large ribosomal subunit; green fluorescent protein (GFP)-fusion protein localizes to the cytoplasm and nucleus	1.14954	0.9497	1.01792	0.978244	1.09172	1.17014	1.12453	0.156354	0.690354	0.884399	0.907522	0.452809	0.123716	0.242141	no
YDL064W	UBC9	SUMO-conjugating enzyme involved in the Smt3p conjugation pathway; nuclear protein required for S- and M-phase cyclin degradation and mitotic control; involved in proteolysis mediated by the anaphase-promoting complex cyclosome (APCC)	0.831528	1.20762	1.26019	1.09171	1.00417	1.04788	0.907784	0.00032523	0.000171059	1.70363e-06	0.190798	0.971604	0.511909	0.0955526	no
YDL065C	PEX19	Chaperone and import receptor for newly-synthesized class I PMPs; binds peroxisomal membrane proteins (PMPs) in the cytoplasm and delivers them to the peroxisome for subsequent insertion into the peroxisomal membrane; interacts with Myo2p and contributes to peroxisome partitioning	0.949688	1.0623	1.02818	0.962519	1.00885	0.976453	0.914093	0.652416	0.602948	0.802762	0.818371	0.959954	0.864326	0.375929	no
YDL066W	IDP1	Mitochondrial NADP-specific isocitrate dehydrogenase; catalyzes the oxidation of isocitrate to alpha-ketoglutarate; not required for mitochondrial respiration and may function to divert alpha-ketoglutarate to biosynthetic processes	1.89479	0.472969	0.609906	1.97272	0.896177	1.15564	3.73789	6.52111e-13	1.07579e-17	3.96574e-08	4.40285e-14	0.406523	0.239521	7.63827e-55	Gcn4
YDL067C	COX9	Subunit VIIa of cytochrome c oxidase (Complex IV); Complex IV is the terminal member of the mitochondrial inner membrane electron transport chain	0.983701	0.992932	1.06601	1.24834	0.976748	1.04863	1.228	0.982082	0.994902	0.914516	0.784141	0.981249	0.954754	0.731753	Gcn4
YDL068W	NA	Dubious open reading frame; unlikely to encode a functional protein, based on available experimental and comparative sequence data	3.85449	0.373151	0.120101	0.351203	1.43831	0.462928	1.35371	NA	NA	NA	NA	NA	NA	NA	no
YDL069C	CBS1	Mitochondrial translational activator of the COB mRNA; membrane protein that interacts with translating ribosomes, acts on the COB mRNA 5'-untranslated leader	0.772681	1.07498	0.896396	1.1661	0.830616	0.692628	0.90102	0.274811	0.829072	0.674942	0.656331	0.501763	0.123716	0.709291	no
YDL070W	BDF2	Protein involved in transcription initiation; acts at TATA-containing promoters; associates with the basal transcription factor TFIID; contains two bromodomains; corresponds to the C-terminal region of mammalian TAF1; redundant with Bdf1p; protein abundance increases in response to DNA replication stress; BDF2 has a paralog, BDF1, that arose from the whole genome duplication	0.999438	1.05122	0.977935	1.0196	1.05063	0.977386	1.01903	0.997658	0.639621	0.827432	0.904995	0.649192	0.852679	0.87261	no
YDL071C	NA	Dubious open reading frame; unlikely to encode a functional protein, based on available experimental and comparative sequence data; partially overlaps the verified ORF BDF2/YDL070W	0.748292	1.12989	0.873328	0.931966	0.845487	0.653504	0.697383	0.25904	0.714433	0.630723	0.881814	0.594059	0.0987723	0.144243	no
YDL072C	YET3	Protein of unknown function; YET3 null mutant decreases the level of secreted invertase; homolog of human BAP31 protein; protein abundance increases in response to DNA replication stress	0.722257	1.03434	1.53879	1.10735	0.74706	1.1114	0.79979	0.000936839	0.839389	3.23522e-06	0.513814	0.00528254	0.41828	0.0321552	no
YDL073W	AHK1	Scaffold protein in the HKR1 sub-branch of the Hog1p-signaling pathway; physically interacts with the cytoplasmic domain of Hkr1p, and with Sho1p, Pbs2p, and Ste11p; prevents cross-talk signaling from Hkr1p of the osmotic stress MAPK cascade to the Kss1p MAPK cascade; non-essential gene	0.985179	1.10996	0.980235	1.10041	1.09351	0.965706	1.0841	0.912099	0.287284	0.859818	0.413559	0.40447	0.788152	0.419702	no
YDL074C	BRE1	E3 ubiquitin ligase; forms heterodimer with Rad6p to regulate K63 polyubiquitination in response to oxidative stress and to monoubiquinate histone H2B-K123, which is required for the subsequent methylation of histone H3-K4 and H3-K79; required for DSBR, transcription, silencing, and checkpoint control; interacts with RNA-binding protein Npl3p, linking histone ubiquitination to mRNA processing; Br…	1.0003	1.17971	1.01154	1.0451	1.18005	1.01184	1.0454	0.998764	0.0115053	0.900042	0.705907	0.017546	0.921434	0.610942	no
YDL075W	RPL31A	Ribosomal 60S subunit protein L31A; associates with karyopherin Sxm1p; loss of both Rpl31p and Rpl39p confers lethality; homologous to mammalian ribosomal protein L31, no bacterial homolog; RPL31A has a paralog, RPL31B, that arose from the whole genome duplication	0.851708	1.18207	1.1698	1.12281	1.00678	0.996325	0.956308	0.0492499	0.0375584	0.0432895	0.248223	0.96616	0.980168	0.672463	no
YDL076C	RXT3	Component of the Rpd3L histone deacetylase complex; involved in histone deacetylation; protein abundance increases in response to DNA replication stress	1.16712	0.799716	0.71355	1.1881	0.933368	0.832801	1.38665	0.113961	0.0126506	4.82262e-05	0.0854647	0.597869	0.0787265	8.80231e-05	no
YDL077C	VAM6	Guanine nucleotide exchange factor for the GTPase Gtr1p; subunit of the HOPS endocytic tethering complex; vacuole membrane protein; functions as a Rab GTPase effector, interacting with both GTP- and GDP-bound conformations of Ypt7p; facilitates tethering and promotes membrane fusion events at the late endosome and vacuole; required for both membrane and protein trafficking; component of vacuole-m…	0.851834	1.00595	1.03952	0.989846	0.856899	0.8855	0.843184	0.182724	0.978574	0.784336	0.968991	0.237996	0.370191	0.150019	no
YDL078C	MDH3	Peroxisomal malate dehydrogenase; catalyzes interconversion of malate and oxaloacetate; involved in the glyoxylate cycle	0.882183	0.984629	1.06099	0.983928	0.868623	0.935986	0.868005	0.139804	0.906966	0.516899	0.923727	0.108754	0.521768	0.0833682	no
YDL079C	MRK1	Glycogen synthase kinase 3 (GSK-3) homolog; one of four GSK-3 homologs in S, cerevisiae that function to activate Msn2p-dependent transcription of stress responsive genes and that function in protein degradation; MRK1 has a paralog, RIM11, that arose from the whole genome duplication	1.17745	0.938243	1.16622	0.989083	1.10473	1.37316	1.16459	0.206017	0.699795	0.182532	0.968163	0.531411	0.0078588	0.244958	no
YDL080C	THI3	Regulatory protein that binds Pdc2p and Thi2p transcription factors; activates thiamine biosynthesis transcription factors Pdc2p and Thi2p by binding to them, but releases and de-activates them upon binding to thiamine pyrophosphate (TPP), the end product of the pathway; has similarity to decarboxylases but enzymatic activity is not detected	1.11623	0.890932	1.00678	1.14465	0.994482	1.12379	1.27768	0.240824	0.216794	0.954582	0.160873	0.975472	0.238675	0.00171182	no
YDL081C	RPP1A	Ribosomal stalk protein P1 alpha; involved in the interaction between translational elongation factors and the ribosome; free (non-ribosomal) P1 stimulates the phosphorylation of the eIF2 alpha subunit (Sui2p) by Gcn2p; accumulation of P1 in the cytoplasm is regulated by phosphorylation and interaction with the P2 stalk component	0.813812	1.21477	1.02732	1.1172	0.988594	0.836049	0.909189	0.093068	0.120258	0.862138	0.525079	0.960919	0.18164	0.50009	no
YDL082W	RPL13A	Ribosomal 60S subunit protein L13A; not essential for viability; homologous to mammalian ribosomal protein L13, no bacterial homolog; RPL13A has a paralog, RPL13B, that arose from the whole genome duplication	0.932014	1.09181	0.950878	1.10739	1.01758	0.886232	1.03211	0.341853	0.216342	0.487239	0.17654	0.87122	0.0831868	0.709534	no
YDL083C	RPS16B	Protein component of the small (40S) ribosomal subunit; homologous to mammalian ribosomal protein S16 and bacterial S9; RPS16B has a paralog, RPS16A, that arose from the whole genome duplication	1.02297	1.0085	0.838772	1.06984	1.03167	0.858037	1.09441	0.786037	0.929808	0.00123587	0.411087	0.716131	0.0129061	0.153102	no
YDL084W	SUB2	Component of the TREX complex required for nuclear mRNA export; member of the DEAD-box RNA helicase superfamily and is involved in early and late steps of spliceosome assembly; homolog of the human splicing factor hUAP56; relocalizes from nucleus to cytoplasm upon DNA replication stress	0.959378	1.08986	1.14485	1.12091	1.04559	1.09834	1.07538	0.507334	0.107089	0.00350188	0.031332	0.5009	0.0914854	0.179202	no
YDL085C-A	NA	Putative protein of unknown function; green fluorescent protein (GFP)-fusion protein localizes to the cytoplasm and nucleus	1.06497	0.614055	0.759022	1.33046	0.653948	0.808332	1.4169	0.901076	0.177042	0.455054	0.568953	0.278258	0.642255	0.349169	no
YDL085W	NDE2	Mitochondrial external NADH dehydrogenase; catalyzes the oxidation of cytosolic NADH; Nde1p and Nde2p are involved in providing the cytosolic NADH to the mitochondrial respiratory chain; NDE2 has a paralog, NDE1, that arose from the whole genome duplication	0.896278	0.548753	0.75476	1.99012	0.491835	0.676475	1.7837	0.823741	0.127371	0.48082	0.0526858	0.076297	0.365341	0.0913054	Gcn4
YDL086C-A	NA	Dubious open reading frame; unlikely to encode a functional protein, based on available experimental and comparative sequence data; overlaps uncharacterized ORF YDL086W; identified by gene-trapping, microarray expression analysis, and genome-wide homology searching	NA	NA	NA	NA	NA	NA	NA	NA	NA	NA	NA	NA	NA	NA	no
YDL086W	NA	Putative carboxymethylenebutenolidase; the authentic, non-tagged protein is detected in highly purified mitochondria in high-throughput studies; YDL086W is not an essential gene	0.996443	0.929466	0.927624	1.07498	0.92616	0.924324	1.07116	0.995161	0.849359	0.811221	0.882399	0.848187	0.836157	0.845496	no
YDL087C	LUC7	Essential protein associated with the U1 snRNP complex; splicing factor involved in recognition of 5' splice site; contains two zinc finger motifs; N-terminal zinc finger binds pre-mRNA; relocalizes to the cytosol in response to hypoxia	0.91324	1.1944	1.14391	0.984753	1.09077	1.04467	0.899316	0.53505	0.160494	0.273634	0.955929	0.589664	0.807718	0.453141	no
YDL088C	ASM4	FG-nucleoporin component of central core of nuclear pore complex (NPC); contributes directly to nucleocytoplasmic transport; induces membrane tubulation, which may contribute to nuclear pore assembly; ASM4 has a paralog, NUP53, that arose from the whole genome duplication	0.974774	1.02278	1.19658	0.972322	0.996978	1.16639	0.947794	0.808718	0.846673	0.00793421	0.844333	0.985023	0.0493233	0.558615	no
YDL089W	NUR1	Protein involved in regulation of mitotic exit; dephosphorylation target of Cdc14p in anaphase, which promotes timely rDNA segregation and allows mitotic progression; interacts with Csm1p, Lrs4p; required for rDNA repeat stability; null mutant causes increase in unequal sister-chromatid exchange; GFP-fusion protein localizes to the nuclear periphery, possible Cdc28p substrate	0.820246	1.26304	1.2232	1.0291	1.036	1.00332	0.844112	0.107555	0.047547	0.0792204	0.90669	0.855323	0.988307	0.179211	no
YDL090C	RAM1	Beta subunit of the CAAX farnesyltransferase (FTase); this complex prenylates the a-factor mating pheromone and Ras proteins; required for the membrane localization of Ras proteins and a-factor; homolog of the mammalian FTase beta subunit	0.949377	1.04027	1.04075	1.03216	0.987608	0.988066	0.979909	0.692828	0.78941	0.739838	0.869175	0.946973	0.946545	0.893394	no
YDL091C	UBX3	Clathrin-coated vesicle component, regulator of endocytosis; copurifies with the DSC ubiquitin ligase complex; UBX (ubiquitin regulatory X) domain-containing protein that interacts with Cdc48p; required for efficient clathrin-mediated endocytosis; ortholog of fission yeast Ucp10	0.813731	1.0992	1.18647	1.11484	0.894454	0.965464	0.907183	0.0541938	0.479241	0.0997126	0.471708	0.39908	0.827593	0.43383	no
YDL092W	SRP14	Signal recognition particle (SRP) subunit; interacts with the RNA component of SRP to form the Alu domain, which is the region of SRP responsible for arrest of nascent chain elongation during membrane targeting; homolog of mammalian SRP14	0.927394	1.11104	1.1962	0.972438	1.03038	1.10934	0.901832	0.450568	0.26393	0.0214601	0.865166	0.820743	0.291251	0.260036	no
YDL093W	PMT5	Protein O-mannosyltransferase; transfers mannose residues from dolichyl phosphate-D-mannose to protein serine/threonine residues; acts in a complex with Pmt3p, can instead interact with Pmt2p in some conditions; target for new antifungals	1.00323	1.07205	1.19038	1.01743	1.07551	1.19422	1.02072	0.986145	0.626776	0.0929296	0.940059	0.622127	0.135503	0.899158	no
YDL094C	NA	Dubious open reading frame; unlikely to encode a functional protein, based on available experimental and comparative sequence data; partially overlaps verfied gene PMT5/YDL093W; YDL094C is not essential	1.09186	1.69743	1.12178	1.05328	1.85336	1.22483	1.15004	NA	0.715714	0.936416	NA	NA	0.913229	0.932796	no
YDL095W	PMT1	Protein O-mannosyltransferase of the ER membrane; transfers mannose from dolichyl phosphate-D-mannose to protein serine and threonine residues; 1 of 7 related proteins involved in O-glycosylation which is essential for cell wall rigidity; involved in ER quality control; amino terminus faces cytoplasm, carboxyl terminus faces ER lumen	1.07258	1.02614	0.853188	0.86225	1.10061	0.915114	0.924833	0.378693	0.801346	0.0121049	0.0383319	0.223094	0.271871	0.303604	no
YDL096C	OPI6	Dubious open reading frame; unlikely to encode a functional protein, based on available experimental and comparative sequence data; partially overlaps verified gene PMT1/YDL095W; YDL096C is not essential	1	2.40277	1	1	1.89716	1	1	NA	NA	NA	NA	NA	NA	NA	no
YDL097C	RPN6	Essential, non-ATPase regulatory subunit of the 26S proteasome lid; required for the assembly and activity of the 26S proteasome; the human homolog (S9 protein) partially rescues Rpn6p depletion; protein abundance increases in response to DNA replication stress	0.708933	1.20214	1.23761	0.983059	0.852239	0.877384	0.696923	2.55811e-08	0.00623968	0.000905576	0.907932	0.0286143	0.0915587	3.23669e-09	no
YDL098C	SNU23	Component of the U4/U6,U5 snRNP complex; involved in mRNA splicing via spliceosome	0.774645	1.51925	1.39354	0.841294	1.17688	1.0795	0.651704	0.0722181	0.000761454	0.00874093	0.371901	0.318656	0.691357	0.00119941	no
YDL099W	BUG1	Cis-golgi localized protein involved in ER to Golgi transport; forms a complex with the mammalian GRASP65 homolog, Grh1p; mutants are compromised for the fusion of ER-derived vesicles with Golgi membranes	0.775787	1.09634	1.35918	0.991055	0.850528	1.05444	0.768847	4.21162e-05	0.23877	2.19641e-07	0.9561	0.0223777	0.555415	2.35544e-05	no
YDL100C	GET3	Guanine nucleotide exchange factor for Gpa1p; amplifies G protein signaling; functions as a chaperone under ATP-depleted oxidative stress conditions; subunit of GET complex, involved in ATP dependent Golgi to ER trafficking and insertion of tail-anchored (TA) proteins into ER membrane under non-stress conditions; binds as dimer to transmembrane domain (TMD) cargo, shielding TMDs from aqueous solv…	0.729539	1.14768	1.49762	1.05785	0.837279	1.09257	0.771743	1.38107e-15	0.00154243	1.5588e-25	0.376641	3.51417e-05	0.0787265	9.41728e-11	no
YDL101C	DUN1	Cell-cycle checkpoint S/T protein kinase; required for transient G2/M arrest after DNA damage, damage-induced transcription, and nuclear-to-cytoplasmic redistribution of Rnr2p-Rnr4p after genotoxic stress and iron deprivation; phosphorylates repair protein Rad55p, transcriptional repressor Sml1p, superoxide dismutase, and ribonucleotide reductase inhibitors Crt1p and Dif1p; functions in the Mec1p…	0.729379	1.21672	1.19744	0.911819	0.887452	0.873388	0.665062	0.0052572	0.121985	0.131532	0.642953	0.422247	0.340615	0.000202985	no
YDL102W	POL3	Catalytic subunit of DNA polymerase delta; required for chromosomal DNA replication during mitosis and meiosis, intragenic recombination, repair of double strand DNA breaks, and DNA replication during nucleotide excision repair (NER)	0.927496	1.04606	0.928131	1.01681	0.970219	0.860838	0.943088	0.484156	0.725861	0.452811	0.929196	0.834683	0.134872	0.602291	no
YDL103C	QRI1	UDP-N-acetylglucosamine pyrophosphorylase; catalyzes the formation of UDP-N-acetylglucosamine (UDP-GlcNAc), which is important in cell wall biosynthesis, protein N-glycosylation, and GPI anchor biosynthesis; protein abundance increases in response to DNA replication stress	0.786908	1.04863	1.25265	1.02547	0.825176	0.98572	0.806952	0.000166317	0.619219	0.000301099	0.858652	0.00600081	0.903107	0.000983576	no
YDL104C	QRI7	Protein involved in threonylcarbamoyl adenosine biosynthesis; Sua5p and Qri7p are necessary and sufficient for RNA t6A modification in vitro; highly conserved mitochondrial protein; essential for t6A modification of mitochondrial tRNAs that decode ANN codons; similar to Kae1p and E, coli YgjD, both of which are also required for tRNA t6A modification; when directed to the cytoplasm, complements t…	1.31266	0.735722	0.746956	1.07796	0.965752	0.980498	1.415	0.106885	0.0614621	0.0612974	0.795584	0.9071	0.947576	0.0281514	Gcn4
YDL105W	NSE4	Component of the SMC5-SMC6 complex; this complex plays a key role in the removal of X-shaped DNA structures that arise between sister chromatids during DNA replication and repair	1.05719	1.0706	1.09651	0.923052	1.13183	1.15921	0.975836	0.835354	0.806722	0.673971	0.818919	0.63031	0.543149	0.931548	no
YDL106C	PHO2	Homeobox transcription factor; regulatory targets include genes involved in phosphate metabolism; binds cooperatively with Pho4p to the PHO5 promoter; phosphorylation of Pho2p facilitates interaction with Pho4p; relocalizes to the cytosol in response to hypoxia	0.827743	1.10929	1.27941	0.950716	0.91821	1.05902	0.786949	0.112897	0.466346	0.0198817	0.816851	0.58278	0.725149	0.0350371	no
YDL107W	MSS2	Peripherally bound inner membrane protein of the mitochondrial matrix; involved in membrane insertion of C-terminus of Cox2p, interacts genetically and physically with Cox18p	1.1465	0.838802	0.809048	0.798974	0.961686	0.927573	0.916024	0.365082	0.221534	0.0964767	0.128491	0.859061	0.687358	0.598908	no
YDL108W	KIN28	Serine/threonine protein kinase, subunit of transcription factor TFIIH; involved in transcription initiation at RNA polymerase II promoters; phosphorylates Ser5 residue of the PolII C-terminal domain (CTD) at gene promoters; relocalizes to the cytosol in response to hypoxia	0.901805	1.09567	1.1425	1.0699	0.988079	1.03031	0.964837	0.316866	0.399392	0.138035	0.644456	0.94419	0.829125	0.774257	no
YDL109C	NA	Putative lipase; involved in lipid metabolism; not an essential gene; YDL109C has a paralog, ROG1, that arose from the whole genome duplication	1.23119	1.10769	1.05546	0.943957	1.36378	1.29947	1.16219	0.177766	0.570649	0.752075	0.829834	0.038461	0.0965548	0.365911	no
YDL110C	TMA17	ATPase dedicated chaperone that adapts proteasome assembly to stress; Tma17p is induced upon stress; interacts with Rpt6p to assist its pairing to Rpt3p and early steps in proteasome biogenesis; associates with ribosomes; heterozygous deletion demonstrated increases in chromosome instability in a rad9 deletion background; protein abundance is decreased upon intracellular iron depletion	0.937613	0.807167	0.661944	0.896671	0.75681	0.620647	0.84073	0.766014	0.221019	0.00456503	0.677399	0.106757	0.00249281	0.324725	no
YDL111C	RRP42	Exosome non-catalytic core component; involved in 3'-5' RNA processing and degradation in both the nucleus and the cytoplasm; has similarity to E, coli RNase PH and to human hRrp42p (EXOSC7)	0.947928	1.13777	1.30545	1.03682	1.07852	1.23748	0.982829	0.516513	0.0542492	3.05926e-06	0.763732	0.35603	0.000998402	0.86185	no
YDL112W	TRM3	2'-O-ribose methyltransferase; catalyzes the ribose methylation of the guanosine nucleotide at position 18 of tRNAs	0.985412	1.01366	1.00837	1.06479	0.99887	0.993661	1.04925	0.927809	0.934316	0.954245	0.722765	0.996148	0.975229	0.72317	no
YDL113C	ATG20	Sorting nexin family member; required for the cytoplasm-to-vacuole targeting (Cvt) pathway and for endosomal sorting; has a Phox homology domain that binds phosphatidylinositol-3-phosphate; interacts with Snx4p; potential Cdc28p substrate	0.742213	1.13499	1.01753	0.919003	0.842408	0.755225	0.682096	0.0161791	0.41694	0.920548	0.702529	0.249167	0.037027	0.00131545	no
YDL114W	NA	Putative short-chain dehydrogenase/reductase; YDL114W is not an essential gene	0.599557	0.461451	1.61361	0.535656	0.276666	0.967449	0.321156	0.494851	0.392087	0.488594	0.575562	NA	0.976895	0.124144	no
YDL114W-A	NA	Dubious open reading frame; unlikely to encode a functional protein, based on available experimental and comparative sequence data; identified based on homology to hemiascomycetous yeasts	NA	NA	NA	NA	NA	NA	NA	NA	NA	NA	NA	NA	NA	NA	no
YDL115C	IWR1	RNA polymerase II transport factor, conserved from yeast to humans; also has a role in transporting RNA polymerase III into the nucleus; interacts with most of the RNAP II subunits; nucleo-cytoplasmic shuttling protein; deletion causes hypersensitivity to K1 killer toxin; protein increases in abundance and relocalizes from nucleus to cytoplasm upon DNA replication stress	0.898853	0.956529	0.969157	0.960362	0.85978	0.87113	0.863224	0.397861	0.785242	0.821604	0.846967	0.233691	0.281155	0.211222	no
YDL116W	NUP84	Subunit of the Nup84p subcomplex of the nuclear pore complex (NPC); contributes to nucleocytoplasmic transport and NPC biogenesis; also plays roles in several processes that may require localization of genes or chromosomes at the nuclear periphery, including double-strand break repair, transcription and chromatin silencing; homologous to human NUP107	1.04236	1.00994	1.03585	1.05376	1.05273	1.07973	1.09839	0.739026	0.94838	0.752075	0.741797	0.68819	0.51192	0.366109	no
YDL117W	CYK3	SH3-domain protein located in the bud neck and cytokinetic actin ring; relocalizes from bud neck to nucleus upon DNA replication stress; activates the chitin synthase activity of Chs2p during cytokinesis; suppressor of growth and cytokinesis defects of chs2 phospho-mutants	0.973239	0.996516	0.963987	0.991685	0.969848	0.93819	0.965147	0.808993	0.982571	0.70286	0.964874	0.802785	0.537315	0.744034	no
YDL118W	NA	Dubious open reading frame, unlikely to encode a protein; overlaps almost completely with YDL119C; mutations that would affect both YDL118W and YDL119C confer defective telomere maintenance and are synthetically sick or lethal with alpha-synuclein	0.748574	2.312	1.85411	0.608577	1.73071	1.38794	0.455565	NA	NA	NA	NA	NA	NA	NA	no
YDL119C	HEM25	Mitochondrial glycine transporter; required for the transport of glycine into mitochondria for initiation of heme biosynthesis, with YMC1 acting as a secondary transporter; homolog of human SLC25A38, a mitochondrial glycine transporter associated with nonsyndromic autosomal recessive congenital sideroblastic anemia; human SLC25A38 can complement the heme deficiency associated with the null mutant…	0.688708	1.03624	1.01469	0.87413	0.71367	0.698824	0.60202	0.0433749	0.909685	0.957019	0.672839	0.0954554	0.0740021	0.00414647	no
YDL120W	YFH1	Mitochondrial matrix iron chaperone; oxidizes and stores iron; interacts with Isu1p to promote Fe-S cluster assembly; mutation results in multiple Fe/S-dependent enzyme deficiencies; human frataxin homolog FXN is mutated in Friedrich's ataxia; human FTL gene can complement yeast yfh1 null mutant	0.817128	1.05406	1.10047	1.00689	0.861306	0.899223	0.822758	0.0909581	0.758097	0.457311	0.978868	0.272513	0.46254	0.101038	no
YDL121C	NA	Putative protein of unknown function; green fluorescent protein (GFP)-fusion protein localizes to the endoplasmic reticulum; YDL121C is not an essential protein	0.919068	1.05595	1.35617	1.14827	0.970492	1.24641	1.05534	0.34175	0.593039	4.34147e-06	0.106048	0.801329	0.00374353	0.569226	no
YDL122W	UBP1	Ubiquitin-specific protease; removes ubiquitin from ubiquitinated proteins; cleaves at the C terminus of ubiquitin fusions irrespective of their size; capable of cleaving polyubiquitin chains	1.10633	0.967001	0.949088	0.934028	1.06982	1.05001	1.03334	0.439525	0.84434	0.693252	0.715699	0.653983	0.764849	0.83265	no
YDL123W	SNA4	Protein of unknown function; localized to the vacuolar outer membrane; predicted to be palmitoylated	0.935612	0.94309	1.43562	1.29601	0.882366	1.34318	1.21257	0.67008	0.736103	0.000453962	0.0330976	0.406525	0.0133849	0.114161	no
YDL124W	NA	NADPH-dependent alpha-keto amide reductase; reduces aromatic alpha-keto amides, aliphatic alpha-keto esters, and aromatic alpha-keto esters; member of the aldo-keto reductase (AKR) family; protein abundance increases in response to DNA replication stress	0.660459	0.922345	0.988074	0.765223	0.609171	0.652582	0.505398	0.028943	0.785242	0.964977	0.294964	0.0109767	0.03516	0.000119033	no
YDL125C	HNT1	Adenosine 5'-monophosphoramidase; interacts physically and genetically with Kin28p, a CDK and TFIIK subunit, and genetically with CAK1; member of histidine triad (HIT) superfamily of nucleotide-binding proteins; protein abundance increases in response to DNA replication stress; human homolog HINT1 can complement yeast hnt1 mutant	0.829642	0.962114	1.12235	1.03723	0.79821	0.93115	0.860531	0.0130425	0.733648	0.13904	0.800978	0.00292984	0.464728	0.0540398	no
YDL126C	CDC48	AAA ATPase; subunit of polyUb-selective segregase complex involved in ERAD, INM-associated degradation (INMAD), mitotic spindle disassembly, macroautophagy, PMN, ribosome-associated degradation, ribophagy, homotypic ER membrane fusion, SCF complex disassembly, cell wall integrity during heat stress, and telomerase regulation; mobilizes membrane-anchored transcription factors by regulated Ub/prote…	0.723327	1.05293	1.32114	1.02976	0.761612	0.955614	0.744852	3.69275e-06	0.629643	7.13696e-05	0.848205	0.000216006	0.682622	2.71743e-05	no
YDL127W	PCL2	Cyclin, interacts with cyclin-dependent kinase Pho85p; member of the Pcl1,2-like subfamily, involved in the regulation of polarized growth and morphogenesis and progression through the cell cycle; localizes to sites of polarized cell growth; PCL2 has a paralog, PCL9, that arose from the whole genome duplication	0.775212	1.12181	1.13788	1.06515	0.869642	0.882096	0.825719	0.0154517	0.37619	0.255987	0.743391	0.277414	0.332759	0.085752	no
YDL128W	VCX1	Vacuolar membrane antiporter with Ca2+/H+ and K+/H+ exchange activity; involved in control of cytosolic Ca2+ and K+ concentrations; has similarity to sodium/calcium exchangers, including the bovine Na+/Ca2+,K+ antiporter	1.00632	1.0148	1.06965	1.16796	1.02121	1.07641	1.17534	0.945255	0.869349	0.255114	0.00519901	0.815471	0.273105	0.00212518	no
YDL129W	NA	Protein of unknown function; green fluorescent protein (GFP)-fusion protein localizes to the cytoplasm and the nucleus; YDL129W is not an essential gene; relative distribution to the nucleus increases upon DNA replication stress	1.21732	1.09479	1.23233	1.18306	1.3327	1.50014	1.44016	0.0933397	0.523013	0.0489505	0.205613	0.0112357	0.000158087	0.00035931	no
YDL130W	RPP1B	Ribosomal protein P1 beta; component of the ribosomal stalk, which is involved in interaction of translational elongation factors with ribosome; free (non-ribosomal) P1 stimulates the phosphorylation of the eIF2 alpha subunit (Sui2p) by Gcn2p; accumulation is regulated by phosphorylation and interaction with the P2 stalk component	0.990758	1.04971	0.80187	1.12104	1.04001	0.794459	1.11067	0.958531	0.756793	0.0283373	0.43853	0.81242	0.0391543	0.387491	no
YDL130W-A	STF1	Protein involved in regulation of the mitochondrial F1F0-ATP synthase; Stf1p and Stf2p act as stabilizing factors that enhance inhibitory action of the Inh1p protein; protein abundance increases in response to DNA replication stress; STF1 has a paralog, INH1, that arose from the whole genome duplication	0.526591	0.876615	1.30469	0.825969	0.461618	0.68704	0.434948	0.00837199	0.727611	0.332592	0.656205	0.00176086	0.190522	0.000385469	no
YDL131W	LYS21	Homocitrate synthase isozyme; catalyzes the condensation of acetyl-CoA and alpha-ketoglutarate to form homocitrate, which is the first step in the lysine biosynthesis pathway; LYS21 has a paralog, LYS20, that arose from the whole genome duplication	1.8721	0.364915	0.661483	1.64802	0.683156	1.23836	3.08525	6.3713e-07	3.13735e-17	0.00141674	0.000196848	0.00732123	0.189514	1.20636e-21	Gcn4
YDL132W	CDC53	Cullin; structural protein of SCF complexes (which also contain Skp1p, Cdc34p, Hrt1p and an F-box protein) involved in ubiquitination; SCF promotes the G1-S transition by targeting G1 cyclins and the Cln-CDK inhibitor Sic1p for degradation; human homolog CUL1 can complement yeast cdc53 null mutant	0.859657	1.01255	0.980586	0.998022	0.870449	0.842968	0.857957	0.00927034	0.900172	0.800597	0.987013	0.0265407	0.005194	0.00794869	no
YDL133C-A	RPL41B	Ribosomal 60S subunit protein L41B; comprises only 25 amino acids; rpl41a rpl41b double null mutant is viable; homologous to mammalian ribosomal protein L41, no bacterial homolog; RPL41B has a paralog, RPL41A, that arose from the whole genome duplication	0.677283	0.983833	0.752748	1.20127	0.666334	0.509824	0.813598	0.546223	0.989953	0.647564	0.858136	0.553476	0.270291	0.771983	no
YDL133W	SRF1	Regulator of phospholipase D (Spo14p); interacts with Spo14p and regulates its catalytic activity; capable of buffering the toxicity of C16:0 platelet activating factor, a lipid that accumulates intraneuronally in Alzheimer's patients	0.993476	1.0329	1.04624	0.904462	1.02616	1.03942	0.898562	0.970916	0.844549	0.725369	0.518688	0.888741	0.810471	0.386136	no
YDL134C	PPH21	Catalytic subunit of protein phosphatase 2A (PP2A); functionally redundant with Pph22p; methylated at C terminus; forms alternate complexes with several regulatory subunits; involved in signal transduction and regulation of mitosis; forms nuclear foci upon DNA replication stress; PPH21 has a paralog, PPH22, that arose from the whole genome duplication	0.871878	1.0386	1.14253	0.965559	0.905536	0.996145	0.841849	0.0515606	0.703312	0.0456617	0.784141	0.220263	0.976895	0.0101446	no
YDL135C	RDI1	Rho GDP dissociation inhibitor; involved in the localization and regulation of Cdc42p and Rho1p; protein abundance increases in response to DNA replication stress	0.868434	0.944675	1.19091	1.02352	0.820388	1.03423	0.888862	0.264254	0.726764	0.118625	0.921276	0.109368	0.847921	0.356144	no
YDL136W	RPL35B	Ribosomal 60S subunit protein L35B; homologous to mammalian ribosomal protein L35 and bacterial L29; RPL35B has a paralog, RPL35A, that arose from the whole genome duplication	0.907809	1.16825	0.939266	1.15569	1.06055	0.852674	1.04914	0.15314	0.0100762	0.359438	0.0278687	0.466899	0.0142996	0.531024	no
YDL137W	ARF2	ADP-ribosylation factor; GTPase of the Ras superfamily involved in regulation of coated formation vesicles in intracellular trafficking within the Golgi; ARF2 has a paralog, ARF1, that arose from the whole genome duplication; arf1 arf2 double null mutation is complemented by human ARF1, ARF4, ARF5, or ARF6	0.904654	0.835609	1.10662	1.01134	0.755937	1.00111	0.91491	0.349894	0.0558745	0.30118	0.958593	0.00166755	0.995279	0.405883	no
YDL138W	RGT2	Plasma membrane high glucose sensor that regulates glucose transport; low affinity sesnor that contains 12 predicted transmembrane segments and a long C-terminal tail required for hexose transporter induction; phosphorylation of the tail by Yck1p/Yck2p facilitates binding to the HXT co-repressors, Mth1p and Std1p; RGT2 has a paralog, SNF3, that arose from the whole genome duplication	1.07692	0.904075	0.805561	1.17827	0.973615	0.867525	1.2689	0.519516	0.36208	0.0134445	0.110628	0.866286	0.189514	0.00674059	no
YDL139C	SCM3	Nonhistone component of centromeric chromatin; binds to histone H3 variant, Cse4p, and recruits it to centromeres; involved in the assembly and maintenance of Cse4-H4 at centromeres; required for kinetochore assembly and G2/M progression; may protect Cse4p from ubiquitination; homolog of mammalian HJURP	1.07601	1.0832	1.07496	0.900633	1.16554	1.15667	0.969093	0.809862	0.802574	0.785267	0.789535	0.605061	0.621658	0.924273	no
YDL140C	RPO21	RNA polymerase II largest subunit B220; part of central core; phosphorylation of C-terminal heptapeptide repeat domain regulates association with transcription and splicing factors; similar to bacterial beta-prime	1.00928	0.921775	0.957967	0.908073	0.930332	0.96686	0.916503	0.937697	0.3598	0.630421	0.323366	0.447779	0.764105	0.29517	no
YDL141W	BPL1	Biotin:apoprotein ligase; covalently modifies proteins with the addition of biotin, required for acetyl-CoA carboxylase (Acc1p) holoenzyme formation; comparative analysis suggests that a mitochondrially targeted form may result from translation starting at a non-canonical codon upstream of the annotated start codon; human homolog HLCS can complement yeast BPL1 mutant	0.999065	0.946729	0.968465	1.2316	0.945844	0.96756	1.23045	0.996371	0.611969	0.746629	0.00859177	0.620228	0.785781	0.00613506	no
YDL142C	CRD1	Cardiolipin synthase; produces cardiolipin, which is a phospholipid of the mitochondrial inner membrane that is required for normal mitochondrial membrane potential and function and for correct integration of membrane-multispanning proteins into the mitochondrial outer membrane; required to maintain tubular mitochondrial morphology and functions in mitochondrial fusion; also required for normal v…	0.929296	1.03077	1.10332	1.12131	0.957891	1.02531	1.04203	0.682666	0.889995	0.521037	0.579009	0.84783	0.913713	0.831752	no
YDL143W	CCT4	Subunit of the cytosolic chaperonin Cct ring complex; related to Tcp1p, required for the assembly of actin and tubulins in vivo	0.875653	1.10117	1.2568	1.03422	0.964243	1.10053	0.905619	0.011959	0.0894695	1.4746e-06	0.724542	0.629278	0.111493	0.0735874	no
YDL144C	NA	Protein of unknown function; green fluorescent protein (GFP)-fusion protein localizes to the cytoplasm and nucleus; YDL144C is not an essential gene; protein abundance increases in response to DNA replication stress	0.843449	1.01944	1.08436	1.04266	0.859843	0.914601	0.879431	0.0412145	0.885405	0.366268	0.784141	0.0986142	0.377982	0.144055	no
YDL145C	COP1	Alpha subunit of COPI vesicle coatomer complex; complex surrounds transport vesicles in the early secretory pathway	0.963395	0.986298	0.909505	1.00673	0.950194	0.876213	0.969881	0.651559	0.892884	0.133262	0.964405	0.540502	0.0485557	0.715766	no
YDL146W	LDB17	Protein involved in the regulation of endocytosis; transiently recruited to actin cortical patches in a SLA1-dependent manner after late coat component assembly; GFP-fusion protein localizes to the periphery, cytoplasm, bud, and bud neck	0.804293	1.12732	1.39436	1.46648	0.906695	1.12147	1.17948	0.14135	0.500905	0.00846531	0.00424867	0.613001	0.512025	0.271225	no
YDL147W	RPN5	Subunit of the CSN and 26S proteasome lid complexes; similar to mammalian p55 subunit and to another S, cerevisiae regulatory subunit, Rpn7p; Rpn5p is an essential protein; the COP9 signalosome is also known as the CSN	0.758795	1.17676	1.27834	0.959095	0.892924	0.970001	0.727757	1.37135e-05	0.0185671	0.000100266	0.740396	0.155627	0.774247	3.00432e-07	no
YDL148C	NOP14	Nucleolar protein; forms a complex with Noc4p that mediates maturation and nuclear export of 40S ribosomal subunits; also present in the small subunit processome complex, which is required for processing of pre-18S rRNA	0.995207	0.993256	1.06701	1.08906	0.988495	1.0619	1.08384	0.976816	0.969385	0.588944	0.591053	0.954	0.677672	0.513125	no
YDL149W	ATG9	Transmembrane protein involved in forming Cvt and autophagic vesicles; cycles between the phagophore assembly site (PAS) and other cytosolic punctate structures, not found in autophagosomes; may be involved in membrane delivery to the PAS	0.945812	1.01687	1.02459	0.998025	0.96177	0.96907	0.943944	0.816439	0.953662	0.91378	0.995714	0.896794	0.913457	0.809714	no
YDL150W	RPC53	RNA polymerase III subunit C53	0.994956	1.05012	1.1539	1.00722	1.04482	1.14808	1.00214	0.977393	0.765705	0.207395	0.977238	0.797976	0.293439	0.989488	no
YDL151C	BUD30	Dubious open reading frame; unlikely to encode a functional protein, based on available experimental and comparative sequence data; not conserved in closely related Saccharomyces species; 96% of ORF overlaps the verified gene RPC53; diploid mutant displays a weak budding pattern phenotype in a systematic assay	NA	NA	NA	NA	NA	NA	NA	NA	NA	NA	NA	NA	NA	NA	no
YDL152W	NA	Dubious open reading frame; unlikely to encode a functional protein, based on available experimental and comparative sequence data; partially overlaps the verified ORF SAS10/YDL153C, a component of the small ribosomal subunit processosome	NA	NA	NA	NA	NA	NA	NA	NA	NA	NA	NA	NA	NA	NA	no
YDL153C	SAS10	Subunit of U3-containing Small Subunit (SSU) processome complex; involved in production of 18S rRNA and assembly of small ribosomal subunit; disrupts silencing when overproduced; mutant has increased aneuploidy tolerance; essential gene	0.955118	1.06487	1.19894	1.05414	1.01707	1.14513	1.00683	0.761601	0.680552	0.0919875	0.79324	0.935196	0.294876	0.967356	no
YDL154W	MSH5	Protein of the MutS family; forms a dimer with Msh4p that facilitates crossovers between homologs during meiosis; msh5-Y823H mutation confers tolerance to DNA alkylating agents; homologs present in C, elegans and humans	1.1753	1.25558	0.973661	0.805876	1.47568	1.14435	0.947148	0.353971	0.140066	0.890909	0.246195	0.0087286	0.481243	0.801772	no
YDL155W	CLB3	B-type cyclin involved in cell cycle progression; activates Cdc28p to promote the G2/M transition; may be involved in DNA replication and spindle assembly; accumulates during S phase and G2, then targeted for ubiquitin-mediated degradation; relative distribution to the nucleus increases upon DNA replication stress; CLB3 has a paralog, CLB4, that arose from the whole genome duplication	0.956145	1.05742	0.954962	1.08883	1.01104	0.913082	1.04108	0.744843	0.692479	0.707454	0.576801	0.955065	0.475365	0.770857	no
YDL156W	CMR1	Nuclear protein with a role in protein quality control; localizes to the intranuclear quality control compartment (INQ) in response to proteasome inhibition or DNA replication stress; INQ likely sequesters proteins involved in DNA metabolism for degradation or re-folding; DNA-binding protein with preference for UV-damaged DNA; contains three WD domains (WD-40 repeat); human ortholog WDR76 also ex…	1.02161	0.925998	0.84855	1.13105	0.946012	0.86689	1.15549	0.918481	0.68422	0.243725	0.527355	0.791908	0.397223	0.342083	no
YDL157C	NA	Putative protein of unknown function; the authentic, non-tagged protein is detected in highly purified mitochondria in high-throughput studies	0.865867	1.01057	1.09099	1.22976	0.87502	0.944656	1.0648	0.0607209	0.931129	0.27163	0.00515711	0.109997	0.571785	0.483099	no
YDL158C	NA	Dubious open reading frame; unlikely to encode a functional protein, based on available experimental and comparative sequence data	0.923388	1.86772	1.01834	1.27075	1.72463	0.940325	1.1734	0.953946	0.549448	0.984555	0.884288	NA	0.969131	0.898243	no
YDL159C-B	NA	Putative protein of unknown function; identified by gene-trapping, microarray-based expression analysis, and genome-wide homology searching	NA	NA	NA	NA	NA	NA	NA	NA	NA	NA	NA	NA	NA	NA	no
YDL159W	STE7	Signal transducing MAP kinase kinase; involved in pheromone response where it phosphorylates Fus3p; involved in the pseudohyphal/invasive growth pathway where it phosphorylates of Kss1p; phosphorylated by Ste11p; degraded by ubiquitin pathway	0.940043	1.037	1.06435	0.980195	0.97482	1.00053	0.921425	0.711963	0.851578	0.674101	0.940986	0.91167	0.998782	0.607521	no
YDL159W-A	NA	Putative protein of unknown function; identified by sequence comparison with hemiascomycetous yeast species	0.6258	1.22	1.91989	2.24085	0.763479	1.20147	1.40233	0.568262	0.850685	0.339281	0.326629	0.784724	0.849156	0.673079	no
YDL160C	DHH1	Cytoplasmic DEAD-box helicase, stimulates mRNA decapping; coordinates distinct steps in mRNA function and decay, interacting with both decapping and deadenylase complexes; role in translational repression, mRNA decay, and possibly mRNA export; interacts and cooperates with Ngr1p to promote specific mRNA decay; ATP- and RNA-bound form promotes processing body (PB) assembly, while ATPase stimulatio…	1.30405	1.02897	0.931774	0.994079	1.34184	1.21508	1.29633	0.00894791	0.860655	0.553805	0.979626	0.00500354	0.0970009	0.0108733	no
YDL160C-A	MHF2	Component of the heterotetrameric MHF histone-fold complex; in humans the MHF complex interacts with both DNA and Mph1p ortholog FANCM to stabilize and remodel blocked replication forks and repair damaged DNA; mhf2 srs2 double mutants are MMS hypersensitive; orthologous to human centromere constitutive-associated network (CCAN) subunit CENP-X, also known as MHF2	0.756708	1.17345	1.1167	1.0653	0.887956	0.845015	0.80612	0.121307	0.449639	0.580476	0.848864	0.613045	0.426455	0.248396	no
YDL161W	ENT1	Epsin-like protein involved in endocytosis and actin patch assembly; functionally redundant with Ent2p; binds clathrin via a clathrin-binding domain motif at C-terminus; relocalizes from bud neck to cytoplasm upon DNA replication stress; ENT1 has a paralog, ENT2, that arose from the whole genome duplication	0.814324	1.0478	1.25451	0.998848	0.85325	1.02158	0.813386	0.00649682	0.673941	0.00145487	0.994639	0.0603853	0.864326	0.00596905	no
YDL162C	NA	Dubious open reading frame; unlikely to encode a functional protein, based on available experimental and comparative sequence data; partially overlaps ENT1/YDL161W, a verified gene involved in endocytosis and actin cortical patch assembly	2.03428	0.947428	1.78669	0.488889	1.92734	3.63463	0.994538	NA	0.97984	0.631132	NA	NA	0.362479	0.997499	no
YDL163W	NA	Dubious open reading frame; unlikely to encode a functional protein, based on available experimental and comparative sequence data; partially overlaps the verified gene CDC9/YDL164C encoding DNA ligase	NA	NA	NA	NA	NA	NA	NA	NA	NA	NA	NA	NA	NA	NA	no
YDL164C	CDC9	DNA ligase I found in nucleus and mitochondria; essential enzyme that joins Okazaki fragments during DNA replication; also acts in ribonucleotide excision repair, base excision repair, and recombination; DNA ligase I mutants trigger ubiquitination of PCNA at K107, facilitating Rad59p-mediated bypass of unligated Okazaki fragments; human homolog LIG1 can complement yeast cdc9 temperature-sensitive…	0.939672	0.935802	0.995423	0.895648	0.879347	0.935372	0.841615	0.656225	0.65317	0.974354	0.469721	0.323101	0.654941	0.126177	no
YDL165W	CDC36	Component of the CCR4-NOT core complex, involved in mRNA decapping; this complex has multiple roles in regulating mRNA levels including regulation of transcription and destabilizing mRNAs through deadenylation; basal transcription factor	0.814482	1.11279	1.29672	1.17244	0.906348	1.05615	0.954934	0.00955654	0.252883	0.000368863	0.0788311	0.325157	0.625114	0.669716	no
YDL166C	FAP7	Essential NTPase required for small ribosome subunit synthesis; mediates processing of the 20S pre-rRNA at site D in the cytoplasm but associates only transiently with 43S preribosomes via Rps14p; complex with Rps14 is conserved between humans, yeast, and arches; may be the endonuclease for site D; depletion leads to accumulation of pre-40S ribosomes in 80S-like ribosomes; human TAF9 functionally…	0.956589	1.04226	1.2713	1.03934	0.997017	1.21611	0.994223	0.692129	0.733064	0.00140103	0.804883	0.985316	0.0238667	0.964503	no
YDL167C	NRP1	Putative RNA binding protein of unknown function; localizes to stress granules induced by glucose deprivation; predicted to be involved in ribosome biogenesis	1.21875	1.02801	1.01803	1.06936	1.25289	1.24072	1.30328	0.00384367	0.800929	0.849299	0.527087	0.00110478	0.00271767	4.0397e-05	no
YDL168W	SFA1	Bifunctional alcohol dehydrogenase and formaldehyde dehydrogenase; formaldehyde dehydrogenase activity is glutathione-dependent; functions in formaldehyde detoxification and formation of long chain and complex alcohols, regulated by Hog1p-Sko1p; protein abundance increases in response to DNA replication stress	0.788523	1.18962	1.4414	1.25836	0.938042	1.13658	0.992248	0.000564562	0.0164829	1.13253e-08	0.00147297	0.512979	0.119716	0.945206	no
YDL169C	UGX2	Protein of unknown function; transcript accumulates in response to any combination of stress conditions	0.775889	1.05215	0.838365	0.961644	0.816349	0.650478	0.746129	0.493433	0.917967	0.640731	0.957224	0.6341	0.243067	0.419232	Gcn4
YDL170W	UGA3	Transcriptional activator for GABA-dependent induction of GABA genes; binds to DNA elements found in the promoters of target genes and increases their expression in the presence of GABA (gamma-aminobutyrate); zinc finger transcription factor of the Zn(2)-Cys(6) binuclear cluster domain type; localized to the nucleus; examples of GABA genes include UGA1, UGA2, and UGA4	2.61913	0.417959	0.49903	1.43709	1.09469	1.30702	3.76394	2.22098e-21	5.60558e-18	1.15185e-11	0.00146731	0.596141	0.0402381	4.46627e-41	Gcn4
YDL171C	GLT1	NAD(+)-dependent glutamate synthase (GOGAT); synthesizes glutamate from glutamine and alpha-ketoglutarate; with Gln1p, forms the secondary pathway for glutamate biosynthesis from ammonia; expression regulated by nitrogen source; assembles into filaments as cells approach stationary phase and under cytosolic acidification and starvation conditions	1.85588	0.605035	0.565198	1.21469	1.12287	1.04894	2.25433	4.88943e-17	1.16775e-11	1.46557e-14	0.0331029	0.26409	0.705043	1.07685e-29	Gcn4
YDL172C	NA	Dubious open reading frame; unlikely to encode a functional protein, based on available experimental and comparative sequence data	NA	NA	NA	NA	NA	NA	NA	NA	NA	NA	NA	NA	NA	NA	no
YDL173W	PAR32	Protein of unknown function; hyperphosphorylated upon rapamycin treatment in a Tap42p-dependent manner; green fluorescent protein (GFP)-fusion protein localizes to the cytoplasm; PAR32 is not an essential gene	1.09751	0.883959	0.877296	0.98669	0.970155	0.962842	1.0829	0.225378	0.0879666	0.0500898	0.926977	0.778075	0.709649	0.31323	no
YDL174C	DLD1	Major mitochondrial D-lactate dehydrogenase; oxidizes D-lactate to pyruvate, transcription is heme-dependent, repressed by glucose, and derepressed in ethanol or lactate; located in the mitochondrial inner membrane	1.18564	0.83522	0.773892	1.31992	0.990271	0.917557	1.56494	0.00402855	0.00179558	2.69433e-06	4.56404e-07	0.935468	0.249973	4.21878e-18	no
YDL175C	AIR2	RNA-binding subunit of the TRAMP nuclear RNA surveillance complex; involved in nuclear RNA processing and degradation; involved in TRAMP complex assembly as a bridge between Mtr4p and Trf4p; stimulates the poly(A) polymerase activity of Pap2p in vitro; has 5 zinc knuckle motifs; AIR2 has a paralog, AIR1, that arose from the whole genome duplication; Air2p and Air1p have nonredundant roles in regu…	0.959945	0.924731	0.957061	1.15255	0.88769	0.918726	1.10638	0.746655	0.506699	0.695863	0.189945	0.283086	0.468755	0.327616	no
YDL176W	NA	Protein of unknown function; predicted by computational methods to be involved in fructose-1,6-bisphosphatase (Fbp1p) degradation; interacts with components of the GID complex; YDL176W is not an essential gene	1.1036	0.96972	0.934768	0.982502	1.07018	1.03161	1.08429	0.309444	0.812299	0.473071	0.919197	0.556533	0.813617	0.421557	no
YDL177C	NA	Putative protein of unknown function; similar to the mouse IMPACT gene; YDL177C is not an essential gene	1.18271	0.879345	1.16608	1.17281	1.04001	1.37914	1.38709	0.265281	0.427735	0.259176	0.356434	0.863736	0.0200414	0.0103395	no
YDL178W	DLD2	D-2-hydroxyglutarate dehydrogenase, and minor D-lactate dehydrogenase; mitochondrial matrix protein that oxidizes D-2-hydroxyglutarate (D-2HG), an oncometabolite, to alpha-ketoglutarate with a minor role in lactate catabolism; located in the mitochondrial matrix	1.14019	0.801412	0.726592	0.954117	0.913758	0.82845	1.08787	0.0471262	0.000170373	1.60834e-08	0.659095	0.243619	0.0047329	0.23958	no
YDL179W	PCL9	Cyclin; forms a functional kinase complex with Pho85p cyclin-dependent kinase (Cdk), expressed in late M/early G1 phase, activated by Swi5p; PCL9 has a paralog, PCL2, that arose from the whole genome duplication	0.798261	1.2795	1.27481	0.9743	1.02137	1.01763	0.777746	0.0487509	0.0263022	0.02243	0.912385	0.919481	0.929265	0.0231234	no
YDL180W	NA	Putative protein of unknown function; green fluorescent protein (GFP)-fusion protein localizes to the vacuole	1.1898	0.771949	0.755906	1.35812	0.918462	0.899375	1.61588	0.0960596	0.00666638	0.00219423	0.00103916	0.530893	0.401939	2.15533e-08	Gcn4
YDL181W	INH1	Protein that inhibits ATP hydrolysis by the F1F0-ATP synthase; inhibitory function is enhanced by stabilizing proteins Stf1p and Stf2p; has a calmodulin-binding motif and binds calmodulin in vitro; INH1 has a paralog, STF1, that arose from the whole genome duplication	1.24923	1.10551	0.989036	1.07581	1.38103	1.23554	1.34394	0.6062	0.84852	0.980244	0.917652	0.44618	0.649831	0.453373	no
YDL182W	LYS20	Homocitrate synthase isozyme and functions in DNA repair; catalyzes the condensation of acetyl-CoA and alpha-ketoglutarate to form homocitrate, which is the first step in the lysine biosynthesis pathway; LYS20 has a paralog, LYS21, that arose from the whole genome duplication	3.00725	0.308748	0.490848	1.86125	0.928482	1.4761	5.59723	1.91388e-08	9.68634e-10	0.000450555	0.00524444	0.839697	0.118682	2.27487e-20	Gcn4
YDL183C	NA	Protein that may form an active mitochondrial KHE system; mitochondrial inner-membrane protein; non-essential gene; KHE system stands for K+/H+ exchanger system	1.82916	0.479373	0.674244	1.42848	0.876851	1.2333	2.61292	0.000156448	1.94448e-06	0.0146446	0.0444615	0.603304	0.329194	9.33972e-11	Gcn4
YDL184C	RPL41A	Ribosomal 60S subunit protein L41A; comprises only 25 amino acids; rpl41a rpl41b double null mutant is viable; homologous to mammalian ribosomal protein L41, no bacterial homolog; RPL41A has a paralog, RPL41B, that arose from the whole genome duplication	0.587621	1.09134	1.18523	1.22602	0.641294	0.696465	0.720433	0.397918	0.917967	0.803461	0.842657	0.525356	0.620927	0.629952	no
YDL185C-A	NA	Dubious open reading frame; unlikely to encode a functional protein, based on available experimental and comparative sequence data; partially overlaps the verified gene YDL185W; identified by homology with hemiascomycetous yeast species	NA	NA	NA	NA	NA	NA	NA	NA	NA	NA	NA	NA	NA	NA	no
YDL185W	VMA1	Subunit A of the V1 peripheral membrane domain of V-ATPase; protein precursor undergoes self-catalyzed splicing to yield the extein Tfp1p and the intein Vde (PI-SceI), which is a site-specific endonuclease; the V1 peripheral membrane domain of the vacuolar H+-ATPase (V-ATPase) has eight subunits; involved in methionine restriction extension of chronological lifespan in an autophagy-dependent mann…	1.07174	0.860806	0.946219	1.08472	0.922564	1.0141	1.16254	0.385335	0.0242744	0.467814	0.369946	0.325304	0.90321	0.0220267	no
YDL186W	NA	Putative protein of unknown function; YDL186W is not an essential gene	1.20521	0.87675	0.8143	1.0356	1.05667	0.981406	1.24812	0.525062	0.693144	0.432237	0.94414	0.897335	0.966942	0.426998	no
YDL187C	NA	Dubious open reading frame; unlikely to encode a functional protein, based on available experimental and comparative sequence data	1	8.96114	2.21583	1	7.07549	1.74956	1	NA	NA	NA	NA	NA	NA	NA	no
YDL188C	PPH22	Catalytic subunit of protein phosphatase 2A (PP2A); functionally redundant with Pph21p; methylated at C terminus; forms alternate complexes with several regulatory subunits; involved in signal transduction and regulation of mitosis; protein abundance increases in response to DNA replication stress; dephosphorylates Tel1p/Mec1p-phosphorylated Cdc13p to promote telomerase release from telomeres at …	0.903628	1.01981	10.6931	9.17645	0.921525	9.66259	8.2921	0.804499	0.968563	3.53999e-23	1.82665e-19	0.865759	8.2108e-21	5.59793e-19	no
YDL189W	RBS1	Protein involved in assembly of the RNA polymerase III (Pol III) complex; high copy suppressor of Pol III assembly mutation and psk1 psk2 mutations that confer temperature-sensitivity for galactose utilization; physically interacts with Pol III; proposed to bind single-stranded nucleic acids via its R3H domain	1.11132	0.859896	44.7418	30.0309	0.955618	49.7224	33.3739	0.614287	0.4515	1.88913e-194	1.76357e-155	0.867841	1.46679e-203	9.39268e-164	no
YDL190C	UFD2	Ubiquitin chain assembly factor (E4); cooperates with a ubiquitin-activating enzyme (E1), a ubiquitin-conjugating enzyme (E2), and a ubiquitin protein ligase (E3) to conjugate ubiquitin to substrates; also functions as an E3	0.901528	1.00451	0.886937	1.13784	0.905596	0.799599	1.0258	0.13617	0.968559	0.0632294	0.0698186	0.190616	0.000565328	0.779762	no
YDL191W	RPL35A	Ribosomal 60S subunit protein L35A; homologous to mammalian ribosomal protein L35 and bacterial L29; RPL35A has a paralog, RPL35B, that arose from the whole genome duplication	0.925656	1.08114	0.967513	1.05139	1.00077	0.895584	0.973227	0.460997	0.473701	0.760266	0.744198	0.99657	0.283847	0.825607	no
YDL192W	ARF1	ADP-ribosylation factor; GTPase of the Ras superfamily involved in regulation of coated vesicle formation in intracellular trafficking within the Golgi; ARF1 has a paralog, ARF2, that arose from the whole genome duplication; arf1 arf2 double null mutation is complemented by human ARF1, ARF4, ARF5, or ARF6	0.875802	1.05271	1.12012	1.08601	0.921962	0.981002	0.951127	0.150678	0.668081	0.201668	0.514317	0.458181	0.892448	0.655237	no
YDL193W	NUS1	Forms dehydrodolichyl diphosphate syntase complex with RER2 or SRT1; tet-repressible mutant shows accumulation of hypoglycosylated forms of CPY, suggesting that Nus1p may be involved in protein trafficking; mutations in human homolog NUS1 have been implicated in congenital scoliosis, neurological impairment, refractory epilepsy, hearing deficit, and visual impairment; human cis-prenyltransferase …	0.857828	1.25179	1.0838	0.909076	1.07382	0.929711	0.779831	0.111234	0.0100139	0.4274	0.471375	0.558916	0.545869	0.00442385	no
YDL194W	SNF3	Plasma membrane low glucose sensor, regulates glucose transport; high affinity sensor that contains 12 predicted transmembrane segments and a long C-terminal tail required for induction of hexose transporters; also senses fructose and mannose; SNF3 has a paralog, RGT2, that arose from the whole genome duplication	1.2726	1.06643	0.991154	1.22518	1.35714	1.26134	1.55916	0.0614422	0.715714	0.960328	0.147192	0.0181903	0.0970009	8.54183e-05	no
YDL195W	SEC31	Component of the Sec13p-Sec31p complex of the COPII vesicle coat; COPII coat is required for vesicle formation in ER to Golgi transport; mutant has increased aneuploidy tolerance	0.987968	0.955909	0.90909	1.03461	0.944408	0.898152	1.02217	0.926222	0.699752	0.271348	0.828054	0.613708	0.269876	0.854906	no
YDL196W	NA	Dubious open reading frame; unlikely to encode a functional protein, based on available experimental and comparative sequence data; open reading frame is located in promoter region of essential gene SEC31	0.853479	0.887762	0.933485	0.973611	0.757686	0.79671	0.830956	0.826142	0.885298	0.920878	0.98085	0.706341	0.767395	0.796021	no
YDL197C	ASF2	Anti-silencing protein; causes derepression of silent loci when overexpressed	0.974677	1.10103	1.09417	1.05298	1.07314	1.06646	1.02632	0.850629	0.37607	0.356945	0.751144	0.572776	0.608427	0.846742	no
YDL198C	GGC1	Mitochondrial GTP/GDP transporter; essential for mitochondrial genome maintenance; has a role in mitochondrial iron transport; member of the mitochondrial carrier family	4.02205	0.163112	0.315732	1.52014	0.656046	1.26989	6.11407	6.5432e-21	4.06894e-35	1.87259e-14	0.0221108	0.0204417	0.253914	8.59736e-36	Gcn4
YDL199C	NA	Putative transporter; member of the sugar porter family	1.36104	0.756866	0.731775	1.40936	1.03012	0.995971	1.91819	0.0433749	0.0722774	0.0291792	0.0215148	0.918577	0.988893	6.68929e-07	Gcn4
YDL200C	MGT1	DNA repair methyltransferase (6-O-methylguanine-DNA methylase); involved in protection against DNA alkylation damage	1.19275	0.869992	1.34807	1.18069	1.03769	1.60792	1.40827	0.164807	0.306348	0.00359645	0.235878	0.854063	1.33637e-05	0.00176769	no
YDL201W	TRM8	Noncatalytic subunit of a tRNA methyltransferase complex; Trm8p and Trm82p comprise an enzyme that catalyzes a methyl-transfer from S-adenosyl-l-methionine to the N(7) atom of guanine at position 46 in tRNA; Trm8 lacks catalytic activity if not bound to Trm82p	1.34624	0.884043	0.771356	1.12017	1.19013	1.03843	1.50801	8.29009e-05	0.170237	0.000498184	0.268884	0.0504174	0.76718	1.08888e-08	no
YDL202W	MRPL11	Mitochondrial ribosomal protein of the large subunit; localizes to vacuole in response to H2O2	1.19599	0.696443	0.738283	0.718172	0.832938	0.882978	0.858926	0.171101	0.00125195	0.00703347	0.00610336	0.192317	0.410179	0.257594	no
YDL203C	ACK1	Protein that functions in the cell wall integrity pathway; functions upstream of Pkc1p; GFP-fusion protein expression is induced in response to the DNA-damaging agent MMS; non-tagged Ack1p is detected in purified mitochondria	0.936631	1.02674	0.958391	1.06111	0.961678	0.897659	0.993868	0.402525	0.792572	0.582973	0.550009	0.678466	0.154247	0.952176	no
YDL204W	RTN2	Reticulon protein; involved in nuclear pore assembly and maintenance of tubular ER morphology; promotes membrane curvature; regulates the ER asymmetry-induced inheritance block during ER stress; role in ER-derived peroxisomal biogenesis; interacts with Sec6p, Yip3p, and Sbh1p; less abundant than RTN1; member of RTNLA (reticulon-like A) subfamily; protein increases in abundance and relocalizes to …	1.55611	0.825975	0.726839	0.809593	1.28531	1.13104	1.25982	0.0247968	0.423786	0.102684	0.440268	0.300691	0.665872	0.307071	no
YDL205C	HEM3	Porphobilinogen deaminase; catalyzes the conversion of 4-porphobilinogen to hydroxymethylbilane, the third step in heme biosynthesis; localizes to the cytoplasm and nucleus; expression is regulated by Hap2p-Hap3p, but not by levels of heme; human homolog HMBS can complement yeast mutant and allow growth of haploid null after sporulation of a heterozygous diploid	1.32073	0.777864	1.04276	1.12753	1.02735	1.3772	1.48916	5.61135e-06	3.83333e-05	0.598004	0.113909	0.804234	3.53277e-07	9.39542e-12	no
YDL206W	NA	Putative protein of unknown function; YDL206W is not an essential protein	1.05614	1.08013	1.12228	1.10047	1.14078	1.18529	1.16225	0.777227	0.690321	0.444822	0.67299	0.456963	0.300587	0.338297	no
YDL207W	GLE1	Cytoplasmic nucleoporin required for polyadenylated mRNA export; contains a nuclear export signal; when bound to inositol hexakisphosphate (IP6), functions as an activator for the Dbp5p ATPase activity at the nuclear pore complex during mRNA export; mediates translation initiation; required for efficient translation termination	1.00389	1.05892	1.03992	0.923653	1.06304	1.04397	0.927248	0.97449	0.532601	0.64582	0.42368	0.519432	0.671021	0.362546	no
YDL208W	NHP2	Protein related to mammalian high mobility group (HMG) proteins; nuclear protein; essential for function of H/ACA-type snoRNPs, which are involved in 18S rRNA processing	0.954963	1.19056	1.21033	1.05369	1.13694	1.15582	1.00623	0.660743	0.026051	0.0100689	0.698862	0.151322	0.0979279	0.959611	no
YDL209C	CWC2	Member of the NineTeen Complex (NTC); this complex contains Prp19p and stabilizes U6 snRNA in catalytic forms of the spliceosome containing U2, U5, and U6 snRNAs; binds directly to U6 snRNA; similar to S, pombe Cwf2	1.0358	1.14011	1.18472	0.904558	1.18093	1.22714	0.936942	0.812219	0.25975	0.091942	0.512068	0.157897	0.0682612	0.63361	no
YDL210W	UGA4	GABA (gamma-aminobutyrate) permease; serves as a GABA transport protein involved in the utilization of GABA as a nitrogen source; catalyzes the transport of putrescine and delta-aminolevulinic acid (ALA); localized to the vacuolar membrane	0.787687	1.6615	1.97123	1.03677	1.30874	1.55271	0.816647	0.267339	0.00334339	2.26884e-05	0.930414	0.203661	0.0184774	0.360624	no
YDL211C	NA	Protein of unknown function; green fluorescent protein (GFP)-fusion protein localizes to the vacuole; YDL211C has a paralog, TDA7, that arose from the whole genome duplication	1.01918	1.09844	1.03323	0.98861	1.11951	1.05305	1.00757	0.933309	0.607291	0.855319	0.971405	0.545227	0.809335	0.971828	no
YDL212W	SHR3	Endoplasmic reticulum packaging chaperone; required for incorporation of amino acid permeases into COPII coated vesicles for transport to the cell surface	1.00569	1.04454	1.13248	1.02254	1.05048	1.13893	1.02836	0.956203	0.594921	0.0341621	0.85521	0.549347	0.0475618	0.740935	no
YDL213C	NOP6	rRNA-binding protein required for 40S ribosomal subunit biogenesis; contains an RNA recognition motif (RRM); hydrophilin essential to overcome the stress of the desiccation-rehydration process; NOP6 may be a fungal-specific gene as no homologs have been yet identified in higher eukaryotes	0.897879	1.18173	1.28781	0.964601	1.06105	1.1563	0.866094	0.267806	0.0565829	0.00120366	0.827978	0.617916	0.131236	0.108541	no
YDL214C	PRR2	Serine/threonine protein kinase; inhibits pheromone induced signalling downstream of MAPK, possibly at the level of the Ste12p transcription factor; mutant has increased aneuploidy tolerance; PRR2 has a paralog, NPR1, that arose from the whole genome duplication	2.9241	0.772693	0.352937	1.45583	2.25943	1.03202	4.25699	5.06313e-10	0.23146	1.04332e-09	0.0697963	8.1919e-06	0.931207	2.53321e-18	no
YDL215C	GDH2	NAD(+)-dependent glutamate dehydrogenase; degrades glutamate to ammonia and alpha-ketoglutarate; expression sensitive to nitrogen catabolite repression and intracellular ammonia levels; genetically interacts with GDH3 by suppressing stress-induced apoptosis	1.46228	0.969119	0.728255	1.12176	1.41712	1.06491	1.64033	2.37347e-08	0.787946	3.17341e-06	0.218131	5.65566e-07	0.546673	4.96702e-14	no
YDL216C	RRI1	Catalytic subunit of the COP9 signalosome (CSN) complex; acts as an isopeptidase in cleaving the ubiquitin-like protein Nedd8 from SCF ubiquitin ligases; metalloendopeptidase involved in the adaptation to pheromone signaling; involved in modulation of genes controlling amino acid and lipid metabolism, and ergosterol biosynthesis	1.09843	1.00017	1.0094	1.10601	1.09862	1.10875	1.21487	0.632017	0.999143	0.963849	0.68278	0.657228	0.621139	0.238448	Gcn4
YDL217C	TIM22	Essential core component of the mitochondrial TIM22 complex; involved in insertion of polytopic proteins into the inner membrane; forms the channel through which proteins are imported	0.93579	0.936988	0.900749	1.1026	0.876824	0.842912	1.0318	0.713495	0.738228	0.490743	0.653145	0.437122	0.280506	0.875191	no
YDL218W	NA	Putative protein of unknown function; YDL218W transcription is regulated by Azf1p and induced by starvation and aerobic conditions; expression also induced in cells treated with the mycotoxin patulin	1.67958	0.570745	0.987637	1.49363	0.95861	1.65881	2.50868	0.00849007	0.00354333	0.963849	0.0486996	0.916719	0.0177722	1.74094e-07	no
YDL219W	DTD1	D-Tyr-tRNA(Tyr) deacylase; functions in protein translation, may affect nonsense suppression via alteration of the protein synthesis machinery; ubiquitous among eukaryotes	0.813109	1.16259	1.46552	1.25787	0.94531	1.19163	1.02278	0.0517048	0.19224	3.11752e-05	0.0376144	0.706341	0.129475	0.886085	no
YDL220C	CDC13	Single stranded DNA-binding protein found at TG1-3 telomere G-tails; key roles in regulation of telomerase, telomere end protection, conventional telomere replication; regulates telomere replication through recruitment of specific sub-complexes, essential function is telomere capping; forms homodimer via N-terminus; disruption of dimerization leads to short telomeres; autophagy and proteasome are…	1.04735	0.978874	1.01141	1.0254	1.02522	1.0593	1.07395	0.814873	0.922882	0.954245	0.930784	0.924316	0.783053	0.701881	no
YDL221W	NA	Dubious open reading frame; unlikely to encode a functional protein, based on available experimental and comparative sequence data; partially overlaps the 3' end of essential gene CDC13	0.685386	1.31799	0.71267	1.11495	0.903334	0.488454	0.764169	0.340988	0.53296	0.385285	0.874645	0.857344	0.060685	0.516105	no
YDL222C	FMP45	Integral membrane protein localized to mitochondria; required for sporulation and maintaining sphingolipid content; similar to SUR7; FMP45 has a paralog, YNL194C, that arose from the whole genome duplication	1.40301	1.42542	0.518423	0.598904	1.99988	0.727354	0.840271	0.57466	0.56571	0.178635	0.441893	0.202853	0.631321	0.795688	no
YDL223C	HBT1	Shmoo tip protein, substrate of Hub1p ubiquitin-like protein; mutants are defective for mating projection formation, thereby implicating Hbt1p in polarized cell morphogenesis; HBT1 has a paralog, YNL195C, that arose from the whole genome duplication	1.33201	0.941916	0.89457	1.01436	1.25464	1.19157	1.35114	0.0669643	0.794867	0.520342	0.968163	0.195265	0.342448	0.0484576	no
YDL224C	WHI4	Putative RNA binding protein; regulates the cell size requirement for passage through Start and commitment to cell division; WHI4 has a paralog, WHI3, that arose from the whole genome duplication	1.04226	1.0562	1.05012	0.951384	1.10084	1.0945	0.991595	0.689195	0.592573	0.585288	0.70586	0.304811	0.333596	0.944544	no
YDL225W	SHS1	Component of the septin ring that is required for cytokinesis; present at the ends of rod-like septin hetero-oligomers; C-terminal extension is important for recruitment of Bni5p to the mother-bud neck, which in turn is required for Myo1p recruitment and cytokinesis; undergoes sumoylation and phosphorylation during mitosis; protein abundance increases in response to DNA replication stress	0.899288	1.08665	1.13256	0.967372	0.977211	1.0185	0.869947	0.156619	0.305687	0.067366	0.799735	0.840586	0.871397	0.0476438	no
YDL226C	GCS1	ADP-ribosylation factor GTPase activating protein (ARF GAP); involved in ER-Golgi transport; required for prospore membrane formation; regulates phospholipase Spo14p; shares functional similarity with Glo3p; GCS1 has a paralog, SPS18, that arose from the whole genome duplication	0.833967	1.10211	1.26372	1.19042	0.919123	1.0539	0.992768	8.58194e-06	0.0332434	1.77552e-09	3.73875e-05	0.091832	0.33602	0.915051	no
YDL227C	HO	Site-specific endonuclease; required for gene conversion at the MAT locus (homothallic switching) through the generation of a ds DNA break; expression restricted to mother cells in late G1 as controlled by Swi4p-Swi6p, Swi5p, and Ash1p	0.726413	1.00182	1.62047	1.63068	0.727736	1.17713	1.18455	0.0172234	0.995854	7.13046e-05	0.000137351	0.0244492	0.315173	0.256828	no
YDL228C	NA	Dubious open reading frame; unlikely to encode a functional protein, based on available experimental and comparative sequence data; almost completely overlaps the verified gene SSB1	NA	NA	NA	NA	NA	NA	NA	NA	NA	NA	NA	NA	NA	NA	no
YDL229W	SSB1	Cytoplasmic ATPase that is a ribosome-associated molecular chaperone; functions with J-protein partner Zuo1p; may be involved in folding of newly-made polypeptide chains; member of the HSP70 family; interacts with phosphatase subunit Reg1p; SSB1 has a paralog, SSB2, that arose from the whole genome duplication	1.1127	0.94437	0.888064	1.05451	1.0508	0.988146	1.17335	0.438306	0.72984	0.334706	0.80418	0.771679	0.955236	0.191504	no
YDL230W	PTP1	Phosphotyrosine-specific protein phosphatase; dephosphorylates a broad range of substrates in vivo, including Fpr3p; localized to the cytoplasm and the mitochondria; proposed to be a negative regulator of filamentation	1.54557	0.529014	0.722234	1.74247	0.817627	1.11626	2.6931	8.38491e-05	1.66037e-09	0.00330803	1.75332e-07	0.15842	0.485966	3.28608e-23	Gcn4
YDL231C	BRE4	Zinc finger protein containing five transmembrane domains; null mutant exhibits strongly fragmented vacuoles and sensitivity to brefeldin A, a drug which is known to affect intracellular transport	1.11364	1.02912	1.03261	1.03945	1.14607	1.14995	1.15757	0.197324	0.804968	0.73074	0.780817	0.105557	0.0977413	0.0582342	no
YDL232W	OST4	Subunit of the oligosaccharyltransferase complex of the ER lumen; complex catalyzes protein asparagine-linked glycosylation; type I membrane protein required for incorporation of Ost3p or Ost6p into the OST complex	0.730006	1.25221	0.895047	1.19192	0.914121	0.65339	0.87011	0.680881	0.798331	0.886334	0.879091	0.935196	0.582293	0.87172	no
YDL233W	MFG1	Regulator of filamentous growth; interacts with FLO11 promoter and regulates FLO11 expression; binds to transcription factors Flo8p and Mss11p; green fluorescent protein (GFP)-fusion protein localizes to the nucleus; YDL233W is not an essential gene	0.955901	1.10703	0.976987	0.933311	1.05821	0.933903	0.892153	0.727311	0.362954	0.85028	0.659786	0.67214	0.599799	0.289678	no
YDL234C	GYP7	GTPase-activating protein for yeast Rab family members; members include Ypt7p (most effective), Ypt1p, Ypt31p, and Ypt32p (in vitro); involved in vesicle mediated protein trafficking; contains a PH-like domain	0.725542	0.993965	1.09294	1.04192	0.721164	0.792975	0.755956	0.0041057	0.97944	0.511671	0.861271	0.00500354	0.0687929	0.0137551	no
YDL235C	YPD1	Osmotic stress-responsive phosphorelay intermediate sensor protein; phosphorylated by the plasma membrane sensor Sln1p in response to osmotic stress and then in turn phosphorylates the response regulators Ssk1p in the cytosol and Skn7p in the nucleus	0.837156	1.26661	1.18247	1.00741	1.06035	0.989909	0.84336	0.0909105	0.0152737	0.0931446	0.973656	0.678668	0.956095	0.103952	no
YDL236W	PHO13	Conserved phosphatase acting as a metabolite repair enzyme; shows specific dephosphorylating activity on two side-products of central carbohydrate metabolism, 2-phosphoglycolate and 4-phosphoerythronate; alkaline phosphatase specific for p-nitrophenyl phosphate; also has protein phosphatase activity; human ortholog PGP shows similar substrate specificity, deletion causes similar metabolite accumu…	1.00727	0.993761	0.921764	1.08246	1.00098	0.928465	1.09033	0.936445	0.947887	0.155455	0.26243	0.991801	0.272768	0.148792	no
YDL237W	AIM6	Protein of unknown function; required for respiratory growth; YDL237W is not an essential gene	0.827049	1.06544	1.16933	1.03069	0.881174	0.967095	0.852434	0.0118185	0.529948	0.034959	0.842271	0.151528	0.774146	0.0404362	no
YDL238C	GUD1	Guanine deaminase; a catabolic enzyme of the guanine salvage pathway producing xanthine and ammonia from guanine; activity is low in exponentially-growing cultures but expression is increased in post-diauxic and stationary-phase cultures	0.64592	1.46804	1.07104	0.910191	0.948238	0.691803	0.587911	0.0586784	0.109366	0.819659	0.839487	0.891363	0.152576	0.0190529	no
YDL239C	ADY3	Protein required for spore wall formation; subunit of the leading edge protein (LEP) complex (Ssp1-Ady3-Don1-Irc10) that forms a ring-like structure at the leading edge of the prospore membrane during meiosis II; mediates assembly of the LEP complex, formation of the ring-like structure via interaction with spindle pole body components and prospore membrane maturation; potentially phosphorylated …	0.695492	1.42903	1.16055	0.956078	0.993879	0.807156	0.664945	0.0177715	0.0189395	0.389218	0.89228	0.985023	0.239521	0.00768613	no
YDL240C-A	NA	Dubious open reading frame; unlikely to encode a functional protein, based on available experimental and comparative sequence data; identified by sequence comparison with hemiascomycetous yeast species	0.779382	0.403435	1.25293	3.57	0.31443	0.97651	2.78239	0.854967	0.519556	0.850652	0.228775	NA	0.988893	0.280617	no
YDL240W	LRG1	GTPase-activating protein (GAP); contains Rho1p-specific GAP activity, interacting with activated forms of Rho1p; functions along with Sac7p as a negative regulator of the Pkc1p-mediated cell wall integrity signaling pathway; negative regulator of cell wall 1,3-beta-glucan biosynthesis; required for efficient cell fusion; contains a RhoGAP domain and three Lin-11-Isl1-Mec-3 (LIM) domains	1.04629	1.17661	1.13505	0.927389	1.23108	1.18759	0.970317	0.682628	0.0462868	0.116412	0.546295	0.0135191	0.0536321	0.801772	no
YDL241W	NA	Putative protein of unknown function; SWAT-GFP and mCherry fusion proteins localize to the endoplasmic reticulum; YDL241W is not an essential gene	0.993046	0.84087	1.48143	1.43029	0.835023	1.47113	1.42035	0.973262	0.18478	0.000184477	0.0016975	0.184579	0.000802818	0.00125222	no
YDL242W	NA	Putative protein of unknown function; conserved across S, cerevisiae strains	0.928308	1.11264	1.2518	0.818779	1.03287	1.16206	0.760079	0.824579	0.757277	0.361636	0.598678	0.942575	0.640621	0.321411	no
YDL243C	AAD4	Putative aryl-alcohol dehydrogenase; involved in oxidative stress response; similar to P, chrysosporium aryl-alcohol dehydrogenase; expression induced in cells treated with the mycotoxin patulin; members of the AAD gene family comprise three pairs (AAD3 + AAD15, AAD6/AAD16 + AAD4, AAD10 + AAD14) whose two genes are more related to one another than to other members of the family	0.977475	1.46075	1.05187	0.835932	1.42785	1.02817	0.817103	0.920888	0.00403573	0.782701	0.374697	0.0141397	0.913229	0.226633	no
YDL244W	THI13	Protein involved in synthesis of the thiamine precursor HMP; member of a subtelomeric gene family including THI5, THI11, THI12, and THI13; hydroxymethylpyrimidine is also known as HMP	0.813302	1.10846	0.921249	0.799934	0.901512	0.749254	0.650588	0.458283	0.765705	0.784825	0.536748	0.765205	0.305075	0.0832511	no
YDL245C	HXT15	Putative transmembrane polyol transporter; supports growth on and uptake of mannitol, sorbitol and xylitol with moderate affinity when overexpressed in a strain deleted for hexose family members; minor hexose transport activity when overexpressed in a similar strain; similarity to hexose transporters; expression is induced by low levels of glucose and repressed by high levels of glucose	0.88878	1.33756	1.43935	1.29108	1.18879	1.27927	1.14749	0.355337	0.00387168	0.000120092	0.021255	0.15615	0.0278049	0.245923	no
YDL246C	SOR2	Sorbitol dehydrogenase; protein sequence is 99% identical to the Sor1p sorbitol dehydrogenase	0.733801	1.56845	1.68192	0.890703	1.15093	1.2342	0.653599	0.0485463	0.00153173	0.000143985	0.653145	0.474215	0.237178	0.0038201	no
YDL247W	MPH2	Alpha-glucoside permease; transports maltose, maltotriose, alpha-methylglucoside, and turanose; almost identical to Mph3p; encoded in a subtelomeric position in a region likely to have undergone duplication	0.989077	1.00222	1.06479	0.98388	0.991274	1.05316	0.973133	0.953946	0.994848	0.641367	0.947356	0.971307	0.762293	0.875191	no
YDL247W-A	NA	Dubious open reading frame; unlikely to encode a functional protein, based on available experimental and comparative sequence data; identified by sequence comparison with hemiascomycetous yeast species	0.729159	1.11041	1.69011	1.71445	0.809667	1.23236	1.25011	0.742447	0.925714	0.505209	0.62557	0.855736	0.84573	0.817855	no
YDL248W	COS7	Endosomal protein involved in turnover of plasma membrane proteins; member of the DUP380 subfamily of conserved, often subtelomeric COS genes; required for the multivesicular vesicle body sorting pathway that internalizes plasma membrane proteins for degradation; Cos proteins provide ubiquitin in trans for nonubiquitinated cargo proteins; the authentic, non-tagged protein is detected in highly pu…	0.686648	1.29297	1.32517	1.33011	0.887818	0.909928	0.913316	0.00519635	0.0794823	0.0375389	0.0632995	0.51935	0.623478	0.609325	no
YDR001C	NTH1	Neutral trehalase, degrades trehalose; required for thermotolerance and may mediate resistance to other cellular stresses; phosphorylated and activated by Cdc28p at the G1/S phase transition to coordinately regulate carbohydrate metabolism and the cell cycle; inhibited by Dcs1p; NTH1 has a paralog, NTH2, that arose from the whole genome duplication	0.996427	0.779635	0.735484	1.00261	0.77685	0.732856	0.999028	0.986929	0.0472011	0.00779072	0.990835	0.0559692	0.0157857	0.995886	Gcn4
YDR002W	YRB1	Ran GTPase binding protein; involved in nuclear protein import and RNA export, ubiquitin-mediated protein degradation during the cell cycle; shuttles between the nucleus and cytoplasm; is essential; homolog of human RanBP1	0.951682	1.10081	1.21505	1.07583	1.04762	1.15634	1.02385	0.677613	0.370807	0.0219797	0.60626	0.718695	0.152576	0.858519	no
YDR003W	RCR2	Vacuolar protein; presumably functions within the endosomal-vacuolar trafficking pathway, affecting events that determine whether plasma membrane proteins are degraded or routed to the plasma membrane; RCR2 has a paralog, RCR1, that arose from the whole genome duplication	0.867421	1.05502	1.30177	1.02699	0.915144	1.12918	0.890836	0.235897	0.734237	0.0074355	0.905732	0.540493	0.346022	0.351271	no
YDR003W-A	NA	Putative protein of unknown function; identified by expression profiling and mass spectrometry	0.751493	1.01135	1.06675	0.842069	0.760024	0.801655	0.632809	0.621444	0.992407	0.914418	0.844333	0.657945	0.734674	0.377365	no
YDR004W	RAD57	Protein that stimulates strand exchange; stimulates strand exchange by stabilizing the binding of Rad51p to single-stranded DNA; involved in the recombinational repair of double-strand breaks in DNA during vegetative growth and meiosis; forms heterodimer with Rad55p	1.00471	1.10949	1.05572	1.02566	1.11471	1.06069	1.03049	0.973262	0.251303	0.560272	0.874645	0.254847	0.590502	0.792664	no
YDR005C	MAF1	Highly conserved negative regulator of RNA polymerase III; involved in tRNA processing and stability; inhibits tRNA degradation via rapid tRNA decay (RTD) pathway; binds N-terminal domain of Rpc160p subunit of Pol III to prevent closed-complex formation; regulated by phosphorylation mediated by TORC1, protein kinase A, Sch9p, casein kinase 2; localizes to cytoplasm during vegetative growth and tr…	0.856934	1.40318	1.40898	0.925799	1.20244	1.2074	0.793349	0.156619	0.000188415	0.00013154	0.645566	0.0932007	0.0868317	0.0206529	no
YDR006C	SOK1	Protein of unknown function; overexpression suppresses the growth defect of mutants lacking protein kinase A activity; involved in cAMP-mediated signaling; localized to the nucleus; similar to the mouse testis-specific protein PBS13	1.14257	0.980047	0.918426	0.999957	1.11977	1.04936	1.14252	0.273457	0.910248	0.485306	0.999763	0.400749	0.76669	0.262231	no
YDR007W	TRP1	Phosphoribosylanthranilate isomerase; catalyzes the third step in tryptophan biosynthesis; in 2004, the sequence of TRP1 from strain S228C was updated by changing the previously annotated internal STOP (TAA) to serine (TCA); enhances vegetative growth at low and high temperatures when used as an auxotrophic marker in strains such as W303	0.990138	1.00292	1.0318	1.21362	0.993028	1.02163	1.20165	0.955346	0.991765	0.81684	0.0931613	0.975177	0.905307	0.0892577	no
YDR008C	NA	Dubious open reading frame; unlikely to encode a functional protein, based on available experimental and comparative sequence data; partially overlaps TRP1/YDR007W on opposite strand	0.768329	0.515123	1.20011	0.714389	0.395784	0.922078	0.548885	NA	0.654512	0.886334	NA	NA	0.963295	0.647009	no
YDR009W	GAL3	Transcriptional regulator; involved in activation of the GAL genes in response to galactose; forms a complex with Gal80p to relieve Gal80p inhibition of Gal4p; binds galactose and ATP but does not have galactokinase activity; GAL3 has a paralog, GAL1, that arose from the whole genome duplication	0.991946	1.26597	1.16469	1.11583	1.25578	1.15531	1.10684	0.97449	0.141513	0.344419	0.656949	0.188258	0.448987	0.597202	no
YDR010C	NA	Dubious open reading frame; unlikely to encode a functional protein, based on available experimental and comparative sequence data	0.64739	1.88642	2.19479	1.86989	1.22125	1.42088	1.21055	0.324108	0.107618	0.023934	0.148272	0.698391	0.429937	0.691671	no
YDR011W	SNQ2	Plasma membrane ATP-binding cassette (ABC) transporter; multidrug transporter involved in multidrug resistance and resistance to singlet oxygen species	1.11395	0.879857	1.12621	1.09419	0.980117	1.25454	1.21888	0.772618	0.744689	0.719548	0.865166	0.971419	0.510746	0.546434	Gcn4
YDR012W	RPL4B	Ribosomal 60S subunit protein L4B; homologous to mammalian ribosomal protein L4 and bacterial L4; RPL4B has a paralog, RPL4A, that arose from the whole genome duplication	1.01614	1.01801	0.943444	1.04784	1.03444	0.958671	1.06475	0.892026	0.885298	0.510773	0.729734	0.76927	0.701968	0.498428	no
YDR013W	PSF1	Subunit of the GINS complex (Sld5p, Psf1p, Psf2p, Psf3p); complex is localized to DNA replication origins and implicated in assembly of the DNA replication machinery	0.910629	1.12247	1.29399	1.00692	1.02215	1.17834	0.916927	0.44769	0.335198	0.00528813	0.976571	0.905652	0.152085	0.485314	no
YDR014W	RAD61	Subunit of a complex that inhibits sister chromatid cohesion; also negatively regulates chromosome condensation; inhibited by Eco1p-acetylated cohesin subunits Smc3p and Mcd1p; binds Smc3p ATPase head of cohesin; related to the human Wapl protein that controls the association of cohesin with chromatin	0.830387	1.19705	1.06866	1.11843	0.994018	0.8874	0.928727	0.117849	0.134601	0.621338	0.493239	0.981249	0.390207	0.606694	no
YDR014W-A	HED1	Meiosis-specific protein; down-regulates Rad51p-mediated mitotic recombination when the meiotic recombination machinery is impaired; promotes synapsis and required for the normal morphogenesis of synaptonemal complex; prevents the recruitment of Rad54p to site-specific DNA double-strand breaks in vivo; early meiotic gene, transcribed specifically during meiotic prophase	0.594772	1.236	1.08486	1.12831	0.73514	0.645245	0.67109	NA	0.919055	0.964977	NA	NA	0.825297	0.826357	no
YDR015C	NA	Dubious open reading frame; unlikely to encode a functional protein, based on available experimental and comparative sequence data; overlaps the verified gene HED1/YDR014W-A	NA	NA	NA	NA	NA	NA	NA	NA	NA	NA	NA	NA	NA	NA	no
YDR016C	DAD1	Essential subunit of the Dam1 complex (aka DASH complex); complex couples kinetochores to the force produced by MT depolymerization thereby aiding in chromosome segregation; is transferred to the kinetochore prior to mitosis	1.11104	0.910857	0.773067	1.32025	1.012	0.85891	1.46685	0.580792	0.650995	0.0828382	0.0892226	0.968844	0.421453	0.0066888	no
YDR017C	KCS1	Inositol hexakisphosphate and inositol heptakisphosphate kinase; generation of high energy inositol pyrophosphates by Kcs1p is required for many processes such as vacuolar biogenesis, stress response, RNA polymerase I-mediated rRNA transcription and telomere maintenance; inositol hexakisphosphate is also known as IP6; inositol heptakisphosphate is also known as IP7	1.26599	1.11398	0.905608	0.934605	1.41028	1.14649	1.1832	0.0178453	0.369049	0.365568	0.693034	0.000320419	0.255771	0.112567	no
YDR018C	NA	Probable membrane protein with three predicted transmembrane domains; similar to C, elegans F55A11,5 and maize 1-acyl-glycerol-3-phosphate acyltransferase; YDR018C has a paralog, CST26, that arose from the whole genome duplication	0.835862	1.63712	1.70499	0.804233	1.36841	1.42513	0.672228	0.729532	0.238248	0.155604	0.75555	0.522548	0.447033	0.375363	no
YDR019C	GCV1	T subunit of the mitochondrial glycine decarboxylase complex; glycine decarboxylase is required for the catabolism of glycine to 5,10-methylene-THF; expression is regulated by levels of levels of 5,10-methylene-THF in the cytoplasm	2.0306	0.531226	0.390437	1.09121	1.07871	0.792823	2.21581	4.53545e-08	9.3419e-07	9.43141e-14	0.734937	0.725366	0.172873	3.14978e-10	no
YDR020C	DAS2	Putative protein of unknown function; non-essential gene identified in a screen for mutants with increased levels of rDNA transcription; weak similarity with uridine kinases and with phosphoribokinases	1.05997	1.18688	1.08591	1.11791	1.25807	1.15104	1.18495	0.673423	0.117678	0.480607	0.440268	0.0348655	0.254315	0.120814	no
YDR021W	FAL1	Nucleolar protein required for maturation of 18S rRNA; member of the eIF4A subfamily of DEAD-box ATP-dependent RNA helicases; 18S rRNA biogenesis defect of the null mutant is functionally complemented by human EIF4A3	1.26109	1.0767	0.837768	0.975341	1.35782	1.0565	1.22999	0.0193469	0.568887	0.0720051	0.902621	0.00176086	0.708416	0.0404557	no
YDR022C	ATG31	Autophagy-specific protein required for autophagosome formation; forms a complex with Atg17p and Atg29p that localizes other proteins to the pre-autophagosomal structure; constitutively phosphorylated, and phosphorylation of residue S174 is required for function; high-copy suppressor of CIK1 deletion	1.33612	0.778124	0.966687	1.11394	1.03967	1.29161	1.48835	0.141091	0.219515	0.887244	0.728688	0.91167	0.24162	0.0288415	no
YDR023W	SES1	Cytosolic seryl-tRNA synthetase; class II aminoacyl-tRNA synthetase that aminoacylates tRNA(Ser), displays tRNA-dependent amino acid recognition which enhances discrimination of the serine substrate, interacts with peroxin Pex21p	0.973511	1.04168	1.09321	0.990312	1.01409	1.06425	0.964079	0.765247	0.643555	0.176695	0.94414	0.903719	0.443084	0.666325	no
YDR024W	FYV1	Dubious open reading frame; unlikely to encode a functional protein, based on available experimental and comparative sequence data; not conserved in closely related Saccharomyces species; mutation decreases survival upon exposure to K1 killer toxin	1.36361	0.251333	0.231767	1.80425	0.342721	0.31604	2.46029	NA	0.468904	0.377194	NA	NA	0.591067	0.575177	no
YDR025W	RPS11A	Protein component of the small (40S) ribosomal subunit; homologous to mammalian ribosomal protein S11 and bacterial S17; N-terminally propionylated in vivo; RPS11A has a paralog, RPS11B, that arose from the whole genome duplication	0.960228	1.06565	0.966423	1.07871	1.02327	0.927987	1.0358	0.665507	0.476688	0.695249	0.447977	0.842201	0.391323	0.70965	no
YDR026C	NSI1	RNA polymerase I termination factor; binds to rDNA terminator element, required for efficient Pol I termination; required for rDNA silencing at NTS1; facilities association of Sir2p with NTS1, contributes to rDNA stability and cell longevity; interacts physically with Fob1p and RENT subunits, Sir2p and Net1p; may interact with ribosomes, based on co-purification experiments; Myb-like DNA-binding …	1.12526	0.972682	0.968095	1.15805	1.09452	1.08936	1.30311	0.0521157	0.750713	0.64582	0.0126672	0.195265	0.22426	4.18822e-07	no
YDR027C	VPS54	Component of the GARP (Golgi-associated retrograde protein) complex; GARP is required for the recycling of proteins from endosomes to the late Golgi, and for mitosis after DNA damage induced checkpoint arrest; potentially phosphorylated by Cdc28p; members of the GARP complex are Vps51p-Vps52p-Vps53p-Vps54p	0.964279	1.15608	0.931656	0.994911	1.11478	0.898376	0.959372	0.783671	0.153237	0.514203	0.980231	0.34724	0.355682	0.753378	no
YDR028C	REG1	Regulatory subunit of type 1 protein phosphatase Glc7p; involved in negative regulation of glucose-repressible genes; involved in regulation of the nucleocytoplasmic shuttling of Hxk2p; REG1 has a paralog, REG2, that arose from the whole genome duplication	1.00372	0.949253	0.861379	0.942316	0.952788	0.864587	0.945825	0.97449	0.578187	0.0280356	0.591053	0.626273	0.06009	0.520535	no
YDR029W	NA	Putative protein of unknown function; conserved among S, cerevisiae strains; YDR029W is not an essential gene	0.868773	1.17236	0.757653	1.05494	1.01852	0.658228	0.916506	0.588051	0.545446	0.197617	0.899326	0.963035	0.0658351	0.757827	no
YDR030C	RAD28	Protein involved in DNA repair; related to the human CSA protein that is involved in transcription-coupled repair nucleotide excision repair	1.07663	0.94001	1.05915	1.03021	1.01204	1.14032	1.10916	0.651559	0.731062	0.699584	0.906604	0.962666	0.391825	0.492718	no
YDR031W	MIX14	Mitochondrial intermembrane space protein of unknown function; required for normal oxygen consumption; contains twin cysteine-x9-cysteine motifs; protein abundance increases in response to DNA replication stress	1.19747	0.858105	1.06673	0.821854	1.02756	1.27738	0.984147	0.449509	0.551627	0.7941	0.490393	0.942771	0.299035	0.959108	no
YDR032C	PST2	Protein with similarity to a family of flavodoxin-like proteins; induced by oxidative stress in a Yap1p dependent manner; the authentic, non-tagged protein is detected in highly purified mitochondria in high-throughput studies; protein abundance increases in response to DNA replication stress; PST2 has a paralog, RFS1, that arose from the whole genome duplication	0.804746	0.908292	1.54165	1.09678	0.730944	1.24063	0.882629	0.0805756	0.537682	4.79896e-05	0.634504	0.00919539	0.101936	0.362376	no
YDR033W	MRH1	Protein that localizes primarily to the plasma membrane; also found at the nuclear envelope; long-lived protein that is asymmetrically retained in the plasma membrane of mother cells; the authentic, non-tagged protein is detected in mitochondria in a phosphorylated state; null mutation confers sensitivity to acetic acid	0.818428	1.17518	0.956914	0.996713	0.9618	0.783165	0.815738	0.0419226	0.120341	0.715438	0.98699	0.796028	0.0153878	0.0343607	no
YDR034C	LYS14	Transcriptional activator involved in regulating lysine biosynthesis; involved in the regulation of genes of the lysine biosynthesis pathway; requires 2-aminoadipate semialdehyde as co-inducer	1.49836	0.715446	0.727631	1.38404	1.07199	1.09025	2.07379	8.90774e-07	5.09762e-05	0.000115512	0.000131556	0.592005	0.468444	2.00434e-21	Gcn4
YDR034C-A	NA	Putative protein of unknown function; contained within the solo Ty1 LTR element YDRWdelta7	2.28454	0.356707	0.269493	0.881747	0.814912	0.615668	2.01439	0.40043	0.297873	0.145659	0.938503	NA	0.731347	0.489136	no
YDR034W-B	NA	Predicted tail-anchored plasma membrane protein; contains conserved CYSTM module; related proteins in other organisms may be involved in response to stress; N- and C-terminal fusion proteins localize to the cell periphery; YDR034W-B has a paralog, YBR056W-A, that arose from the whole genome duplication	0.471557	1.37534	1.03123	1.19479	0.64855	0.486284	0.56341	0.11828	0.604748	0.963195	0.842271	0.452155	0.164516	0.249516	no
YDR035W	ARO3	3-deoxy-D-arabino-heptulosonate-7-phosphate (DAHP) synthase; catalyzes the first step in aromatic amino acid biosynthesis and is feedback-inhibited by phenylalanine or high concentration of tyrosine or tryptophan	2.92129	0.282747	0.42166	1.69677	0.825988	1.23179	4.95677	3.52009e-26	3.25341e-36	3.56552e-17	1.77114e-06	0.166366	0.124235	3.9723e-59	Gcn4
YDR036C	EHD3	3-hydroxyisobutyryl-CoA hydrolase; member of a family of enoyl-CoA hydratase/isomerases; non-tagged protein is detected in highly purified mitochondria in high-throughput studies; phosphorylated; mutation affects fluid-phase endocytosis	0.954066	0.976668	0.861797	0.687781	0.931806	0.822211	0.656188	0.754303	0.894094	0.184007	0.000364155	0.641615	0.106686	2.07712e-05	no
YDR037W	KRS1	Lysyl-tRNA synthetase	1.56236	0.613496	0.718184	1.55872	0.9585	1.12206	2.43527	9.95376e-09	1.46287e-10	3.05231e-05	3.89168e-08	0.744737	0.278119	4.61414e-34	Gcn4
YDR038C	ENA5	Protein with similarity to P-type ATPase sodium pumps; member of the Na+ efflux ATPase family	1.13163	1.0086	1.03956	1.05033	1.14136	1.17639	1.18858	0.113961	0.945997	0.662739	0.695681	0.104597	0.0383807	0.0160008	no
YDR039C	ENA2	P-type ATPase sodium pump; involved in Na+ efflux to allow salt tolerance; likely not involved in Li+ efflux	1.14935	0.980907	1.07099	1.03944	1.1274	1.23094	1.19468	0.0558019	0.864865	0.374036	0.763991	0.131798	0.00368502	0.00899358	no
YDR040C	ENA1	P-type ATPase sodium pump; involved in Na+ and Li+ efflux to allow salt tolerance	1.15998	0.96977	1.10718	1.05225	1.12491	1.28431	1.22059	0.0609899	0.793884	0.200728	0.697771	0.183435	0.00100038	0.00657815	no
YDR041W	RSM10	Mitochondrial ribosomal protein of the small subunit; has similarity to E, coli S10 ribosomal protein; essential for viability, unlike most other mitoribosomal proteins	1.1207	0.721373	0.839829	0.772496	0.808442	0.941195	0.865736	0.493985	0.0132526	0.216539	0.0882051	0.172501	0.767885	0.354996	no
YDR042C	NA	Putative protein of unknown function; expression is increased in ssu72-ts69 mutant	0.842522	1.38939	2.15889	0.893312	1.17059	1.81891	0.752635	0.513946	0.140954	1.26633e-05	0.776713	0.580027	0.00279326	0.235688	no
YDR043C	NRG1	Transcriptional repressor; recruits the Cyc8p-Tup1p complex to promoters; mediates glucose repression and negatively regulates a variety of processes including filamentous growth and alkaline pH response; activated in stochastic pulses of nuclear localization in response to low glucose	0.396732	2.0182	1.45642	1.21864	0.800684	0.577807	0.483474	1.02622e-13	3.40776e-08	0.00673029	0.31705	0.165743	5.86553e-05	7.65192e-09	no
YDR044W	HEM13	Coproporphyrinogen III oxidase; oxygen-requiring enzyme that catalyzes sixth step in heme biosynthetic pathway; transcription is repressed by oxygen and heme (via Rox1p and Hap1p); human homolog CPOX can complement yeast mutant and allow growth of haploid null after sporulation of a heterozygous diploid	1.10822	1.013	1.10149	0.712664	1.12263	1.22069	0.789791	0.526689	0.953662	0.51814	0.0104945	0.498791	0.181581	0.0782824	no
YDR045C	RPC11	RNA polymerase III subunit C11; mediates pol III RNA cleavage activity and is important for termination of transcription; homologous to TFIIS	0.824725	1.20975	1.23506	1.16677	0.997712	1.01859	0.962265	0.358835	0.37478	0.26501	0.576007	0.995387	0.955236	0.886761	no
YDR046C	BAP3	Amino acid permease; involved in uptake of cysteine, leucine, isoleucine and valine; BAP3 has a paralog, BAP2, that arose from the whole genome duplication	1.4503	0.677589	0.637994	1.37171	0.982705	0.925281	1.98938	0.00389568	0.00199713	0.000221591	0.0242905	0.945791	0.686528	3.33854e-09	no
YDR047W	HEM12	Uroporphyrinogen decarboxylase; catalyzes the fifth step in the heme biosynthetic pathway; localizes to both the cytoplasm and nucleus; a hem12 mutant has phenotypes similar to patients with porphyria cutanea tarda	0.924552	1.09441	1.08984	0.998567	1.01184	1.00761	0.923227	0.176578	0.111269	0.105902	0.988634	0.903279	0.936127	0.163774	no
YDR048C	NA	Dubious open reading frame; unlikely to encode a functional protein, based on available experimental and comparative sequence data; partially overlaps ORF VMS1/YDR049W	0.405385	2.40278	1	1	0.974049	0.461187	0.49352	NA	NA	NA	NA	NA	NA	NA	no
YDR049W	VMS1	Component of a Cdc48p-complex involved in protein quality control; exhibits cytosolic and ER-membrane localization, with Cdc48p, during normal growth, and contributes to ER-associated degradation (ERAD) of specific substrates at a step after their ubiquitination; forms a mitochondrially-associated complex with Cdc48p and Npl4p under oxidative stress that is required for ubiquitin-mediated mitocho…	0.969437	1.02242	1.03671	1.09495	0.991175	1.00502	1.06149	0.788958	0.86548	0.722668	0.425118	0.956363	0.975944	0.558615	no
YDR050C	TPI1	Triose phosphate isomerase, abundant glycolytic enzyme; mRNA half-life is regulated by iron availability; transcription is controlled by activators Reb1p, Gcr1p, and Rap1p through binding sites in the 5' non-coding region; inhibition of Tpi1p activity by PEP (phosphoenolpyruvate) stimulates redox metabolism in respiring cells; E104D mutation in human homolog TPI1 causes a rare autosomal disease; …	0.909527	0.988389	1.10502	1.05737	0.898967	1.00505	0.961709	0.120147	0.90182	0.079312	0.508813	0.0889206	0.963019	0.587733	no
YDR051C	DET1	Acid phosphatase; involved in the non-vesicular transport of sterols in both directions between the endoplasmic reticulum and plasma membrane; deletion confers sensitivity to nickel	0.910279	1.11617	1.33215	1.1257	1.01603	1.21263	1.0247	0.185923	0.110838	2.46848e-07	0.105026	0.889809	0.00275746	0.790789	no
YDR052C	DBF4	Regulatory subunit of Cdc7p-Dbf4p kinase complex; required for Cdc7p kinase activity and initiation of DNA replication; phosphorylates the Mcm2-7 family of proteins; cell cycle regulated; relative distribution to the nucleus increases upon DNA replication stress; co-expression of human CDC7 and DBF4 complements single cdc7 or dbf4 null mutations or the cdc7 dbf4 double null mutation	0.946477	1.13705	1.11711	1.01868	1.07619	1.05731	0.964159	0.55647	0.0968094	0.135132	0.903908	0.4365	0.575362	0.715766	no
YDR053W	NA	Putative protein of unknown function; open reading frame overlaps 5' end of essential DBF4 gene encoding the regulatory subunit of the Cdc7p-Dbf4p kinase complex	0.205603	3.48237	1	1	0.715986	0.233905	0.250304	NA	NA	NA	NA	NA	NA	NA	no
YDR054C	CDC34	Ubiquitin-conjugating enzyme (E2); catalytic subunit of SCF ubiquitin-protein ligase complex (together with Skp1p, Rbx1p, Cdc53p, and an F-box protein) that regulates cell cycle progression by targeting key substrates for degradation; protein abundance increases in response to DNA replication stress; human CDC34 functionally complements the thermosensitivity of the cdc34-2 mutant	0.89984	1.12619	1.11279	1.19729	1.01339	1.00133	1.07737	0.259612	0.194755	0.213967	0.0404677	0.932634	0.993456	0.446474	no
YDR055W	PST1	Cell wall protein that contains a putative GPI-attachment site; secreted by regenerating protoplasts; up-regulated by activation of the cell integrity pathway, as mediated by Rlm1p; upregulated by cell wall damage via disruption of FKS1; PST1 has a paralog, ECM33, that arose from the whole genome duplication	0.777233	0.958187	1.24921	0.942277	0.744734	0.970929	0.732369	0.00615128	0.765705	0.0136185	0.724554	0.00144437	0.84467	0.000384322	no
YDR056C	EMC10	Putative protein of unknown function; subunit of evolutionarily conserved EMC (Endoplasmic Reticulum Membrane Complex) implicated in ERAD (ER-associated degradation) and proper assembly of multi-pass transmembrane (TM) proteins; EMC acts in yeast as an ER-mitochondria tether that interacts with outer membrane protein Tom5p of TOM (Translocase of the Mitochondrial Outer Membrane) complex; YDR056C …	0.848487	1.22367	1.32484	1.10973	1.03827	1.12411	0.941588	0.0471262	0.00950414	9.59632e-05	0.33107	0.753486	0.21195	0.549006	no
YDR057W	YOS9	ER quality-control lectin; integral subunit of the HRD ligase; participates in efficient ER retention of misfolded proteins by recognizing them and delivering them to Hrd1p; binds to glycans with terminal alpha-1,6 linked mannose on misfolded N-glycosylated proteins and participates in targeting proteins to ERAD; member of the OS-9 protein family	0.989677	1.08187	1.18691	0.967061	1.0707	1.17466	0.957078	0.950891	0.546366	0.0796938	0.866378	0.626694	0.157682	0.755793	no
YDR058C	TGL2	Triacylglycerol lipase that is localized to the mitochondria; has lipolytic activity towards triacylglycerols and diacylglycerols when expressed in E, coli	1.05507	0.903889	1.20334	1.05228	0.953669	1.26961	1.11024	0.772618	0.562815	0.161346	0.841422	0.82808	0.102068	0.518652	no
[truncated: 5,491 more rows]
